# Supplementary material for: Differential lncRNA/mRNA expression profiling and ceRNA network analyses in amniotic fluid from foetuses with ventricular septal defects
Source: PeerJ. 2023 Feb 27;11:e14962. doi: 10.7717/peerj.14962 (PMC9979828; doi:10.7717/peerj.14962)
Supplement: Supplemental Information 1 [file peerj-11-14962-s001.xlsx]

## Sheet: Sheet1
Table S1 Detailed clinical data for each individual human subject
Sample	Maternal age (years)	Gestational age (weeks)	Number of deliveries	Body mass index (kg/m2)
T1	31	22	2	23
T2	34	20	2	21
T3	24	20	1	22
T4	31	20	3	21
T5	37	22	3	22
T6	35	22	2	23
T7	26	21	1	21
T8	29	22	1	24
T9	34	21	3	23
T10	29	22	2	21
T11	29	21	1	22
N1	33	21	2	24
N2	33	21	3	19
N3	34	20	2	22
N4	33	22	1	23
N5	35	20	2	21
N6	30	21	3	22
N7	27	20	1	22
N8	31	20	2	21
N9	19	22	1	23
N10	34	20	3	22
N11	39	20	3	21
T: VSD group sample; N: Control group sample.
