# Supplementary material for: Differential lncRNA/mRNA expression profiling and ceRNA network analyses in amniotic fluid from foetuses with ventricular septal defects
Source: PeerJ. 2023 Feb 27;11:e14962. doi: 10.7717/peerj.14962 (PMC9979828; doi:10.7717/peerj.14962)
Supplement: Supplemental Information 2 [file peerj-11-14962-s002.xlsx]

## Sheet: Sheet1
Table S2 Sequences of the primer used for qRT-PCR
Gene	Forward primer (5'-3')	Reverse primer (3'-5')
IDS	CGCGTTTCTTTCCTCACTGG	CCGACATGGTCACATAGCCA
ID1	ACGACATGAACGGCTGTTACTCAC	GAGAATCTCCACCTTGCTCACCTTG
NR2F2	CGCCTATAAATCGCATTCCCTC	AGTACGGCACCCGGAGAAA
GPC3	CAGTCAGCAGGCAACTCCGAAG	AAGAAGAAGCACACCACCGAGATG
AL022323.5	TTGGGAACCTTGAACCCACC	TTTGGTGTAGAGGAGCGTGG
LINC00598	ATCTTCCTCCTCCTCACTTCTCTGC	GGCTTCTCTGGTTATCACTCGTTCC
GATA3-AS1	TCTTGGGAAAAAGGCAGAAGAAAG	TTTCTGGCCTTTGGTGTCGC
PWRN1	AAAACATCTCGGCAGGTAAAG	GCAATCAGACACACAAGCACA
LINC01551	GCAGACAGAAGCCCTTGAAGT	TCAACACTGTCCACTACCCCTA
GAPDH	TTGGTATCGTGGAAGGACTCA	AGTAGAGGCAGGGATGATGTT
