# Supplementary material for: Differential lncRNA/mRNA expression profiling and ceRNA network analyses in amniotic fluid from foetuses with ventricular septal defects
Source: PeerJ. 2023 Feb 27;11:e14962. doi: 10.7717/peerj.14962 (PMC9979828; doi:10.7717/peerj.14962)
Supplement: Supplemental Information 3 [file peerj-11-14962-s003.xlsx]

## Sheet: Sheet1
Transcript_ID	GeneSymbol	P-value	FDR	Fold Change	Regulation	T1	T2	T3	T4	T5	N1	N2	N3	N4	N5
HBMT00001235558	CATG00000084711.1	0.00127781	0.156914	2.89582	up	5.07863	5.59831	5.89987	4.91001	5.17985	3.78268	2.83122	4.3298	4.13321	3.9199
T331597	G077702	0.0452707	0.329809	3.97473	up	4.6909	3.97716	8.0884	7.61066	5.79648	4.10987	3.29072	3.66126	4.71532	4.43214
ENST00000438736	LINC02590	0.00658153	0.206715	2.88718	up	7.45548	8.17612	7.36785	6.19624	6.82281	5.83106	5.04877	6.5708	5.35289	5.56667
ENST00000531994	GRM5-AS1	0.0354861	0.305072	2.12436	up	2.97471	4.80128	5.32782	4.72401	3.93522	3.03929	2.94624	3.29223	3.68738	3.36274
FTMT24200006550	CATG00000007019.1	0.00557772	0.202157	2.1967	up	7.69855	7.14992	6.56025	6.33668	6.2746	6.0609	5.26895	5.62799	5.82156	5.56393
ENST00000628780	LINC01451	0.0222394	0.262702	2.14315	up	5.83916	6.61897	7.20387	7.86866	6.22031	5.48448	5.15201	5.98091	5.81494	5.81996
ENST00000484476	LDLRAP1	0.00437025	0.194699	2.19179	up	6.71496	7.20723	7.32104	7.9481	6.98085	5.91987	5.49336	6.11868	6.71905	6.26067
ENST00000632331	LINC01090	0.0069718	0.207082	2.12082	up	11.7683	12.2717	12.0895	10.8615	11.9282	11.0769	10.3703	11.1718	10.4619	10.4151
ENST00000576808	AC124319.1	0.0484529	0.337859	2.1153	up	2.97471	4.06541	4.94415	5.13548	3.34837	2.41143	2.80323	3.50197	3.12566	3.22152
ENST00000614509	AC106028.4	0.0246919	0.270001	2.76853	up	6.68412	4.56868	4.75331	5.0792	4.11601	3.18254	3.11573	4.75045	3.39051	3.4165
ENST00000436845	LINC01423	0.00452861	0.195366	2.01166	up	5.14154	5.20364	4.99611	4.62943	3.9816	3.88466	3.29771	3.93902	3.78531	4.0037
ENST00000504808	LINC02021	0.0212134	0.260772	2.03059	up	5.91373	6.39936	7.66293	6.75874	6.57103	5.93802	5.625	6.26846	5.12939	5.23543
ENST00000554537	AL133523.1	0.00239947	0.163701	2.37415	up	8.84508	8.32933	8.50616	7.54258	8.05809	7.17417	6.77261	7.53027	7.11101	6.45614
ENST00000442133	PPP3CB-AS1	0.00098468	0.156914	2.07951	up	10.0188	10.027	10.3324	10.0797	9.94091	9.14716	8.26703	9.09231	9.43334	9.17777
ENST00000504301	AC111000.4	0.00279129	0.168305	2.13838	up	4.55385	5.01747	5.82098	5.01845	4.46754	3.74176	3.98607	4.14402	3.91657	3.60729
ENST00000446184	AL669970.2	0.000653371	0.156914	2.00323	up	7.15765	7.86149	7.4749	7.29604	6.89727	6.50491	5.98496	6.467	6.36827	6.35058
ENST00000443778	LINC00327	0.00939962	0.218716	3.0386	up	8.67377	9.26147	8.5086	7.48378	7.83554	7.05808	5.73594	7.78695	6.91803	6.24713
ENST00000564394	AC137932.1	0.00106112	0.156914	3.97345	up	7.03112	6.32336	8.45771	8.17433	7.15709	5.22248	5.44827	5.33868	5.64381	5.53841
ENST00000309331	GRIK1-AS1	0.0176545	0.249281	2.03291	up	5.78188	6.21558	5.5793	5.11372	4.66721	4.4632	3.682	4.87189	4.84171	4.38115
T258061	G059442	0.0221588	0.262702	2.25293	up	9.41457	9.43046	8.47455	8.15566	9.10562	7.99354	7.58561	8.86705	7.24714	7.0285
TCONS_00006544	XLOC_003164	0.0144143	0.242472	2.1498	up	6.23054	5.77334	6.98776	5.89312	6.07017	5.50629	4.39277	5.91877	4.58499	5.03108
T140209	G032709	0.0319713	0.294952	2.40281	up	5.83988	6.49135	6.20648	4.51305	5.41245	4.39481	3.34723	5.52138	4.44133	4.43486
TCONS_00023984	XLOC_011316	0.00382265	0.187696	2.70473	up	8.31905	8.91382	8.51571	7.42947	7.78943	7.07544	6.34929	7.5568	6.4501	6.35843
ENST00000566054	LINC02130	0.000930171	0.156914	2.01779	up	5.35909	5.01413	4.82637	4.55677	4.33328	4.03912	3.8978	3.69468	3.86352	3.53066
ENST00000528428	RAG2	0.0421023	0.320922	2.1692	up	5.96532	6.4294	4.54627	4.60462	4.55253	4.16385	3.27011	4.39802	4.54332	4.13703
T141421	G032935	0.0249899	0.270513	2.2266	up	4.40838	5.32805	6.80032	5.4093	5.07934	3.97527	3.8012	4.59237	4.40195	4.48039
ENST00000447343	AL121845.1	0.0084522	0.214602	2.30834	up	4.47869	5.70335	6.06008	4.93748	4.6212	4.30199	3.49889	3.92278	4.31524	3.72763
ENST00000450247	AC005871.1	0.0455733	0.330718	2.49052	up	5.77369	7.18095	5.94784	4.52241	5.19324	4.86139	3.5359	5.42424	3.86821	4.34614
T127301	G029713	0.00332852	0.179334	2.19624	up	4.39671	4.10071	4.77501	4.4369	3.56855	3.39505	2.41549	3.15759	3.46828	3.16628
ENST00000445817	LINC01641	0.00876412	0.214709	2.04588	up	7.67173	7.57496	8.57575	7.52206	6.96569	6.84572	6.15323	6.72984	6.98674	6.43105
ENST00000391970	PTPRC	0.0051786	0.197654	2.25112	up	9.21879	10.1227	9.25821	8.79815	8.79082	8.29949	7.57554	8.66642	7.87862	7.91538
TCONS_00021712	XLOC_010296	0.00102875	0.156914	2.72189	up	5.4747	5.48343	5.65791	4.83789	4.66538	3.2389	3.32601	4.29071	3.98543	4.0552
ENST00000509252	TRIM52-AS1	0.00120321	0.156914	2.06011	up	6.49863	6.82597	6.90147	6.44447	5.9545	5.82381	5.02136	5.44618	5.54366	5.57644
T058234	G013478	0.0116769	0.228847	2.58349	up	7.46804	8.02941	7.70155	6.2649	6.67875	6.10634	5.06548	6.64368	5.91235	5.56818
NR_024074	GOLGA8IP	0.0115183	0.228847	2.2872	up	6.9999	7.54163	8.28981	7.05044	7.34346	6.2808	6.03546	7.29632	5.61559	6.02918
ENST00000564869	TMEM186	0.00742524	0.20912	2.27206	up	8.16841	8.81401	8.25145	7.63098	7.639	6.89617	6.19696	7.7573	6.95362	6.77981
T144201	G033563	0.0160828	0.244607	2.22025	up	4.96338	5.88173	6.68894	5.19304	5.55983	5.17372	3.87629	4.86214	4.32413	4.29703
ENST00000586552	LINC00479	0.043336	0.324648	2.09997	up	4.16544	4.46847	6.25314	6.06306	4.66524	3.99288	4.16489	3.64683	4.11383	4.34507
TCONS_00018545	XLOC_008866	0.00522252	0.198624	2.55253	up	8.31694	8.60836	8.4175	7.26497	7.34428	6.87351	5.89248	6.99699	6.99966	6.42978
ENST00000476208	ANKAR	0.0407361	0.316471	2.04393	up	5.54985	5.50021	3.47807	4.02431	4.08411	3.58679	3.33222	3.51215	3.49466	3.554
ENST00000554650	AL158801.2	0.0108411	0.228847	2.25078	up	8.83727	8.08954	9.23971	9.79085	8.57461	7.86953	6.99621	7.76049	8.25469	7.79894
ENCT00000289336	CATG00000060189.1	0.0474122	0.334752	2.41653	up	5.28221	5.46212	6.0327	5.72733	8.23762	4.90703	4.74088	4.64604	5.12666	4.95668
ENST00000492725	ATP1B3-AS1	0.00016081	0.156914	2.25429	up	7.37626	7.14114	7.45522	7.06528	6.66991	5.9787	5.55479	6.01469	6.18175	6.11452
ENST00000474561	AC093904.1	0.00457211	0.195366	2.69314	up	6.00875	7.18543	7.33077	6.18035	6.58382	5.27146	4.59969	6.11881	4.88935	5.26336
T153267	G035523	0.0185585	0.252852	2.55821	up	5.76684	6.69261	4.89205	4.60598	4.69884	4.27762	3.76331	4.73314	3.50272	3.60388
T107430	G025351	0.00639368	0.20592	2.25017	up	7.61507	7.10585	7.58299	7.53118	6.26726	6.2445	5.32687	6.39186	6.28959	5.99937
NR_103772	LOC100288162	0.000893118	0.156914	2.76625	up	5.80462	6.16683	6.2534	5.89653	5.71267	4.28804	3.98468	5.52817	4.30609	4.3874
FTMT24800003018	CATG00000009146.1	0.00411823	0.189527	2.01394	up	5.47421	4.40827	4.67427	4.70833	3.98378	3.7619	3.49858	3.43054	3.79967	3.70805
T070890	G016402	0.00751418	0.210713	2.09676	up	6.02459	5.61045	5.74354	4.64923	5.10491	4.69214	4.08826	4.8651	4.13536	4.01105
ENST00000485041	TUBA4B	0.00759393	0.210976	2.17789	up	9.61989	9.34174	10.2849	10.8	9.25275	8.76361	8.34689	8.78187	9.04642	8.74583
T101265	G023885	0.0008385	0.156914	2.58421	up	4.31432	5.20543	5.11169	4.65469	4.50986	3.62177	2.65841	3.83867	3.3422	3.48631
ENST00000443633	LINC01166	0.00537878	0.201109	2.18055	up	4.58749	4.2026	5.47955	4.55528	4.06771	3.04205	3.36266	4.06302	3.40688	3.39457
ENST00000586962	AC002116.2	0.000440554	0.156914	2.21968	up	4.54602	4.31451	5.10161	5.12921	4.23172	3.51743	3.5267	3.46839	3.33781	3.72098
TCONS_00023350	XLOC_011212	0.00177591	0.158809	2.36196	up	6.27882	6.69949	5.79868	5.66905	5.32031	5.10348	4.38407	4.82883	4.60083	4.64923
NR_027084	RP11-744K17.9	0.0230011	0.26552	2.27966	up	5.11078	5.92824	7.13756	5.85839	5.58464	5.00382	3.75497	5.26475	4.76418	4.88781
ENST00000470042	NBPF24	0.0054645	0.201463	3.37641	up	5.0548	5.13805	7.24008	6.7332	5.29472	4.03894	3.83058	4.13943	4.31004	4.3644
ENST00000621095	AC026469.1	0.0349935	0.304842	2.34159	up	4.43764	4.43867	5.93279	6.51309	4.95193	3.85999	3.36738	4.7118	3.72505	4.47246
NR_130127	ZNF511-PRAP1	0.00152858	0.157752	2.06873	up	7.79691	7.43942	7.92602	7.62422	6.96415	6.73712	5.95228	6.52698	6.76894	6.52169
ENST00000589540	AL157938.2	0.00824943	0.214602	2.61279	up	6.34364	7.1032	7.90002	7.39382	5.7656	5.53508	5.24066	5.25371	5.77443	5.77443
TCONS_00025267	XLOC_012072	0.00173836	0.158809	2.17231	up	9.58715	9.43634	9.15348	8.59518	8.47455	8.20533	7.6873	8.00886	8.02711	7.72193
HBMT00001230142	CATG00000083795.1	0.0309784	0.292401	2.15883	up	8.00292	8.13654	9.65267	9.51417	7.96337	7.43311	6.89564	8.01181	7.61507	7.76278
ENST00000322220	HECW1-IT1	0.0110202	0.228847	2.06573	up	5.23913	6.00582	5.58692	4.77834	4.44381	3.91896	3.78489	4.57941	4.46384	4.07365
ENST00000583942	LINC02582	0.00494669	0.195947	2.03662	up	10.8	11.7196	11.4212	10.56	11.1454	10.3221	9.89302	10.645	9.71764	9.93752
ENST00000592094	LINC00910	0.00205245	0.162305	2.41043	up	4.71498	4.81518	5.73223	5.32231	4.34553	3.47448	4.11172	4.00608	3.38246	3.60907
ENST00000580048	LINC00909	0.0445879	0.327772	3.19959	up	5.961	6.35222	9.14823	8.69603	6.80584	5.54652	4.8572	6.11806	5.49319	6.55893
ENST00000445450	ZNF503	0.0154504	0.243303	2.43522	up	7.20803	8.29834	7.93126	6.99173	6.64202	6.1591	5.53331	7.19758	5.77704	5.98411
FTMT22000006760	CATG00000077092.1	0.00713681	0.207082	2.34848	up	6.97373	7.09244	7.40222	8.04035	6.22965	6.00154	5.22009	6.14726	6.16209	6.04875
ENST00000421147	LINC02474	0.00615052	0.205067	2.02972	up	9.83921	10.6357	11.0288	9.91633	10.3775	9.49405	9.03898	9.91598	9.13376	9.10835
NR_135060	DCP1B	0.0151478	0.243303	2.14594	up	8.11042	8.39791	9.07324	7.5532	8.06863	7.13662	6.67195	8.12129	6.95084	6.81464
ENST00000451368	AC004540.2	0.00139828	0.156914	2.05164	up	5.27975	4.71442	5.12629	5.52564	4.53892	3.76865	3.94997	4.38869	4.13669	3.75712
ENST00000544339	AC125616.1	0.000707672	0.156914	2.34546	up	4.91959	5.17821	5.63714	4.79476	4.91631	3.89206	3.57022	4.41555	3.41378	4.00504
T260159	G059815	0.0435696	0.325209	2.03164	up	5.68985	5.85165	7.0941	5.24824	5.94644	4.80365	4.85657	6.06945	4.30418	4.68322
ENST00000640346	AL158064.1	0.0175621	0.249057	2.09314	up	6.11072	6.87139	7.52838	7.17377	5.90388	5.65176	5.0049	6.09315	5.77852	5.73144
T304787	G071083	0.0336157	0.299994	2.6867	up	5.53408	7.17768	4.34241	4.40517	4.816	3.97846	3.70363	4.46076	3.61897	3.38436
ENST00000427030	AC003084.1	0.0236682	0.267549	2.83632	up	4.52687	4.4454	6.67673	5.07945	4.56371	3.39341	2.92526	4.80902	3.0071	3.63727
T001422	G000172	0.00407306	0.188894	2.45996	up	6.53128	7.19727	7.97501	6.58699	6.50153	5.65921	5.14319	6.1516	5.63577	5.70915
T028928	G006465	0.000582816	0.156914	2.29766	up	9.24971	9.48796	9.03936	8.52837	8.83727	8.01793	7.49227	8.24789	7.53705	7.8467
TCONS_00011819	XLOC_005302	0.0334998	0.299679	2.70792	up	5.21078	4.17384	6.11205	6.53249	3.83463	3.89433	4.37672	3.45759	3.71831	3.2309
T019592	G004336	0.0138294	0.238816	2.5118	up	5.70495	6.87164	6.40608	4.75854	5.24475	4.79988	3.81023	4.80753	4.39858	4.52612
ENST00000420172	AL020993.1	0.00264618	0.165931	3.04776	up	6.75259	7.29498	7.23757	6.29452	6.07313	5.21726	4.43776	6.13871	4.97319	4.84713
T015056	G003293	0.0345793	0.302677	2.86534	up	10.8461	9.38567	8.46723	8.07814	8.1781	8.07838	7.85979	6.76356	7.92602	6.73392
MICT00000357699	CATG00000108287.1	0.00785713	0.212698	2.15964	up	4.16006	4.95217	6.01009	5.20463	4.72126	3.88945	3.58537	3.9154	4.05588	4.04815
ENST00000565845	ATXN2L	0.00115113	0.156914	2.00044	up	9.08436	9.08524	9.47794	9.86284	8.81868	8.39164	8.01989	8.37819	8.45318	8.08458
ENST00000590679	AL031772.1	0.00252037	0.163701	3.12382	up	6.62079	6.98396	7.56895	5.65369	6.04151	4.91557	4.80956	5.5934	4.66282	4.671
ENST00000496335	PDAP1	0.00547718	0.201463	2.29984	up	6.44921	7.1472	7.06243	6.17263	5.99371	5.26073	4.70421	6.05533	5.51405	5.2832
T067342	G015639	0.0136424	0.238586	3.36455	up	4.60386	5.38507	6.83687	5.94665	4.54529	3.5108	2.41549	4.18477	4.24022	4.2144
NR_146881	LINC02255	0.0109141	0.228847	2.6722	up	6.54805	6.94458	6.29576	5.15834	5.48601	4.75429	3.68712	5.36948	4.81382	4.71788
T155707	G035955	0.00118667	0.156914	2.34869	up	4.58652	4.91938	4.49767	4.26351	3.96252	3.85528	2.76191	3.26082	2.86982	3.32248
TCONS_00004618	XLOC_002527	0.0229896	0.26552	2.01586	up	6.91715	6.56697	7.15333	6.70892	5.51166	5.7729	5.16495	5.44083	6.31829	5.1041
ENST00000413494	AL022329.2	0.0407648	0.316471	2.25575	up	5.63357	5.58387	7.51126	6.8792	5.214	5.3044	4.20476	5.12141	5.17329	5.15003
MICT00000192240	CATG00000049047.1	0.00436845	0.194699	2.04918	up	4.72365	5.75195	5.03032	4.58209	5.11175	3.91162	3.74998	4.54977	3.6092	4.20395
ENST00000558185	AC012050.1	0.00295837	0.171452	2.36295	up	5.87214	5.71439	6.72884	5.57241	5.13521	5.0907	4.35519	4.39684	4.55179	4.42553
TCONS_00023502	XLOC_011346	2.65142e-05	0.119885	2.10597	up	4.62872	4.33143	4.40911	4.80053	4.19322	3.33095	3.58727	3.49972	3.33548	3.23717
ENST00000568751	LINC01229	0.0235902	0.267489	2.16863	up	4.42376	5.74702	5.05689	4.14197	3.84961	3.1484	2.91846	4.03443	3.79347	3.74059
ENST00000642039	AC091939.1	0.00605442	0.204584	2.13376	up	7.37788	7.82775	8.15968	8.98148	7.65151	6.84357	6.53338	7.06175	7.13151	6.96108
T317445	G074324	0.00574679	0.202829	2.41324	up	6.94984	7.66293	8.57165	7.61245	6.85806	6.53365	5.75323	6.54725	6.2697	6.19624
ENST00000570199	AC068724.3	0.00382253	0.187696	2.20873	up	6.08797	6.22364	7.03682	6.42766	5.6788	5.22073	4.51457	5.59316	5.14216	5.26819
ENST00000586894	AC008686.1	0.000557892	0.156914	2.08135	up	5.25803	4.49906	4.65044	4.77514	4.42382	3.52281	3.87499	4.03404	3.42652	3.46055
ENST00000422780	AC092490.1	0.0207031	0.259466	2.07178	up	7.90095	8.36956	7.81721	6.7978	7.22832	6.85646	5.94598	7.34346	6.30981	6.40378
T344492	G081010	0.032938	0.298241	2.73065	up	5.30347	6.53102	6.62398	5.46195	4.26607	4.75487	2.80961	4.38846	4.27164	4.71567
FTMT26600004608	CATG00000034727.1	0.000282697	0.156914	2.24398	up	9.97575	9.42209	9.47567	9.78714	9.3844	8.76677	8.00916	8.73628	8.52507	8.17747
NR_045121	DGCR9	0.000148286	0.156914	2.12209	up	7.84286	7.81452	8.06175	8.53887	8.00215	7.01974	6.62743	7.14283	7.13505	6.90767
ENST00000471005	SLC4A1	0.00195523	0.159003	2.6962	up	6.47904	7.17861	6.37574	6.02167	5.65386	4.90065	4.32351	5.51421	4.93163	4.8843
T048559	G011317	0.00737376	0.208746	2.0234	up	8.88734	9.48369	8.81166	8.30487	8.23002	8.00686	7.24507	8.22254	7.59243	7.56679
HBMT00000734730	CATG00000040757.1	0.00866046	0.214709	2.13444	up	10.4131	10.6877	10.8345	9.53497	10.2886	9.61403	8.97374	9.95155	8.92453	8.82571
ENST00000419151	LINC02090	0.0167486	0.247147	2.01941	up	5.09653	5.96501	4.85571	4.14677	4.58441	3.8657	3.77152	4.48525	3.79955	3.65675
TCONS_00029515	XLOC_014158	0.00432303	0.194699	2.03511	up	5.26173	4.57918	6.04612	4.98591	4.95392	4.45473	3.9642	4.00148	4.10672	4.1742
ENST00000518172	AC008514.1	0.00366745	0.185758	2.03415	up	11.1501	11.4643	11.5459	10.5596	10.8373	10.4595	9.74105	10.5372	9.91355	9.78386
ENST00000473885	TUBA4B	0.00728315	0.208046	2.04769	up	9.84643	9.64129	10.4706	11.0415	9.74855	9.2381	8.68327	9.08078	9.3351	9.24121
ENST00000454104	AL357140.1	0.00205561	0.162305	2.55613	up	4.88711	5.63148	5.42951	5.20743	4.83232	3.76304	3.90336	4.79581	3.33157	3.42429
ENST00000603156	AC004130.1	0.0165957	0.247049	2.05855	up	5.9087	6.67134	6.12999	5.07369	5.63357	5.07898	4.04442	5.37206	4.91798	4.79571
TCONS_00010235	XLOC_004700	0.00138211	0.156914	2.29158	up	9.41969	9.14389	9.4261	8.50251	8.46096	8.11892	7.35866	7.97958	7.78878	7.72552
T063079	G014555	0.0157518	0.243388	2.18722	up	4.54515	3.29656	4.68836	4.4021	2.98743	2.41143	2.90656	3.08644	3.03096	2.83871
ENST00000521523	AC064802.1	0.00385248	0.188199	2.06522	up	10.0118	10.6925	10.7451	9.75752	10.2928	9.41214	9.03545	9.87707	8.91509	9.02857
TCONS_00013978	XLOC_006617	2.11578e-05	0.119885	2.2063	up	5.56988	5.69601	5.7231	5.66046	5.51666	4.60158	4.01405	4.52802	4.59811	4.71623
ENST00000448948	AC003035.2	0.0486963	0.338591	2.01393	up	6.45086	6.29554	5.5825	4.44713	5.41948	4.95906	3.84351	5.31074	4.55296	4.47917
ENST00000470435	OR2A1-AS1	0.0173192	0.248742	2.57393	up	8.01305	8.8066	7.61782	7.02689	7.02689	6.53914	5.5059	7.26284	6.56127	5.80225
ENST00000615487	AC010503.4	0.0120369	0.229817	2.15238	up	4.91138	3.9534	5.10231	5.26239	3.71004	3.26058	3.97407	3.26688	3.51181	3.39651
ENST00000435444	AL135923.2	0.0101104	0.223727	2.02173	up	7.59905	6.92821	6.68738	6.75782	6.29939	6.46105	5.26548	6.15431	5.81969	5.49336
T269117	G062332	0.0148701	0.243303	2.90508	up	8.50769	9.09856	8.04446	7.14069	7.54876	6.76695	5.57608	7.69968	6.5595	6.04505
ENST00000564963	LOXL1-AS1	0.0134077	0.237463	2.04936	up	4.3206	3.72122	5.15346	4.95308	3.79642	3.5636	3.14542	2.87569	3.67322	3.51099
ENST00000586675	AC004637.1	0.00466229	0.195366	2.48967	up	5.97439	6.16438	6.05717	5.39299	5.03707	4.60686	3.74193	5.28836	4.14007	4.26904
ENST00000395731	HTR5A-AS1	0.0203124	0.259466	2.15501	up	5.99658	4.94479	6.62113	6.6504	5.10688	4.67804	4.58025	4.43764	5.13063	4.95474
T036689	G008310	0.024481	0.269818	2.08901	up	4.45951	4.95812	4.53271	4.34751	3.01297	3.73079	2.69533	3.60119	2.99964	2.96977
TCONS_l2_00009699	XLOC_l2_005195	0.00223665	0.163507	2.09552	up	7.83603	8.1335	8.79082	8.06343	7.81966	7.16304	6.71892	7.62801	6.7529	7.04403
TCONS_00024747	XLOC_012031	0.0399988	0.315816	2.40518	up	8.6548	8.93114	7.58561	6.67634	7.13785	6.72331	5.98951	7.50895	6.44516	5.98808
ENST00000526229	NCAM1-AS1	0.00877731	0.214709	2.49354	up	6.22065	6.5717	5.46819	4.77918	4.98787	4.55227	3.91058	4.76485	4.22395	3.98498
ENST00000414769	MIR503HG	0.00320642	0.178076	2.00094	up	9.29373	8.80905	9.60383	10.0552	9.19087	8.44535	7.98697	8.56014	8.67563	8.28123
ENST00000613093	AC084018.2	0.00783043	0.212698	2.06844	up	5.21673	4.72925	6.02384	6.16636	4.93428	4.11985	4.51105	4.454	4.30821	4.43465
ENST00000558691	LINGO1-AS1	0.00470558	0.195366	2.8837	up	4.75565	5.73206	4.39529	3.93409	4.06927	2.96551	2.90433	3.82769	2.41835	3.13089
T109441	G025902	0.0468544	0.333761	2.09851	up	4.83284	4.74191	5.64689	4.15504	4.52728	3.97697	3.33255	5.07256	2.87034	3.30471
T259943	G059783	0.0363784	0.306828	2.16432	up	5.16541	5.85789	6.51691	4.61391	5.47183	4.83987	4.205	5.38271	3.80921	3.8196
ENST00000518902	LINC01484	0.014761	0.243303	2.11733	up	5.07734	5.20012	6.16545	5.78776	4.21375	4.07459	3.94523	4.1054	4.44631	4.46168
ENCT00000004319	CATG00000115245.1	0.00415158	0.190264	2.1181	up	11.1977	10.9392	11.6552	10.7263	10.4939	10.1989	9.66528	10.495	9.75187	9.48738
TCONS_00006757	XLOC_003387	0.0365412	0.306828	2.37039	up	9.59028	10.0877	8.51431	7.69565	8.40633	8.16001	7.0001	8.22409	7.43406	7.25038
T132737	G031142	0.00518763	0.197654	2.0486	up	5.38348	5.32142	5.76	5.15912	4.47589	4.44494	3.7786	4.69169	3.86833	4.14315
TCONS_00010233	XLOC_004700	0.012699	0.233487	2.04493	up	8.23612	8.58158	8.12259	7.14494	7.41132	7.09957	6.37601	7.39663	6.87022	6.59388
ENST00000450618	AL033519.3	0.0264769	0.276487	2.47289	up	4.78699	4.32726	6.06974	6.10283	3.80445	3.75844	4.12393	3.6595	3.71922	3.29919
TCONS_00029886	XLOC_014334	0.0220806	0.262702	2.25677	up	8.74181	9.19456	8.15921	7.36852	7.56817	7.02897	6.70387	7.92386	6.70776	6.79652
ENST00000478366	ITIH4-AS1	0.0455015	0.330328	2.29068	up	4.56616	4.42165	5.57201	2.88098	3.99466	3.14664	3.35486	3.86381	2.41835	2.67291
ENST00000609143	LINC01278	0.00689029	0.207082	2.22198	up	5.47779	6.2262	6.9182	5.68358	5.45736	4.81654	4.24209	5.13075	5.05364	4.76087
NR_110738	LOC101928804	0.0023442	0.163701	2.08358	up	6.13585	5.80126	5.65058	5.41221	4.96423	4.54401	4.04417	4.66703	4.90886	4.50474
ENST00000454935	OLMALINC	0.00275022	0.167224	2.10711	up	10.587	10.6747	11.0136	10.0082	10.25	9.84458	9.14283	9.91098	9.12729	9.13151
ENST00000457853	LINC01270	0.0166276	0.247147	2.11019	up	6.9069	5.80328	7.22913	6.7479	5.70961	5.65113	4.69541	5.38256	5.57781	5.70303
T163183	G037783	0.0101882	0.223993	2.21566	up	6.08077	6.69508	7.09724	6.71042	5.23258	5.22303	4.80529	5.42036	5.30355	5.32519
ENST00000594558	AC104534.1	0.00565404	0.202624	2.4687	up	9.6224	8.80401	9.21707	8.08206	8.22587	7.62668	7.17747	8.05393	7.61195	6.96262
ENST00000588192	AC011471.2	0.032676	0.297318	2.4969	up	4.53363	5.44243	6.86342	4.72082	5.5429	4.00094	3.86166	5.13014	3.2541	4.25566
ENST00000558963	AC087516.2	0.0488177	0.338972	2.09062	up	6.08769	5.66261	6.23184	6.14765	4.91893	4.29672	4.78171	6.20975	4.46373	3.97716
ENST00000370535	LINC00632	0.0233008	0.26658	2.90708	up	7.24347	7.7062	6.16828	5.11156	5.75811	5.30791	4.30789	5.65635	4.76317	4.25445
T312311	G073197	0.0349366	0.304842	2.55834	up	7.79155	8.27125	6.52601	5.65776	6.12778	5.84473	5.05076	6.06872	5.47779	5.15631
ENST00000514568	AC092490.1	0.00499546	0.196074	2.1366	up	5.98029	6.18914	7.33424	6.19147	6.05899	5.41116	4.95992	5.69667	4.96287	5.24691
T342826	G080487	0.0123279	0.230964	2.58244	up	5.46671	6.45108	4.30691	4.68088	4.49863	3.79658	3.23156	4.21504	3.61682	3.70051
NR_146456	LINC02446	0.00824917	0.214602	2.01635	up	7.14543	7.3235	8.25507	7.67616	6.79172	6.62463	5.92489	6.81334	6.37401	6.39628
T152908	G035460	0.0447631	0.328063	2.56839	up	4.26343	4.37987	5.48715	4.9885	2.40763	2.41143	2.41549	3.01873	3.55434	3.32225
ENST00000455257	AL358115.1	0.00651611	0.206715	2.02285	up	5.67908	6.36293	5.49127	5.20298	4.84772	4.13354	4.5253	4.79857	4.38327	4.66134
T236685	G054366	0.0214779	0.261603	2.48008	up	6.83406	7.58582	6.81729	5.80927	6.10112	5.76965	4.389	6.35058	5.04012	5.04628
ENST00000443997	MIR497HG	0.00221662	0.163507	2.73708	up	5.58958	4.97617	6.54805	6.51391	5.44311	4.59194	4.09507	4.11912	4.40921	4.5923
NR_121632	CA3-AS1	0.0124562	0.232242	2.37492	up	4.91437	6.08279	6.08904	6.97444	5.54172	4.38186	4.17615	5.24414	4.67197	4.88883
ENST00000591056	ZNF561-AS1	0.00646851	0.20592	2.08208	up	7.36526	7.01223	8.39388	8.1429	7.12031	6.64794	6.27424	6.47327	6.67153	6.67747
T050852	G011911	0.0168101	0.247147	2.50369	up	8.74141	8.93718	8.41405	7.28135	7.55377	7.09016	6.06963	7.72658	7.06659	6.35454
BIG-lncRNA-1001.1	BIG-lncRNA-1001	0.0164641	0.246943	2.21792	up	7.02149	7.78317	6.85018	5.86764	6.65839	5.78039	5.38435	6.5163	5.43788	5.31592
ENST00000411694	LINC01678	0.00263098	0.165777	2.01937	up	6.68698	6.26918	7.23389	6.7953	6.21558	5.55589	5.21425	5.4558	5.97	5.93545
ENST00000634933	LINC00856	0.0243434	0.269818	2.00524	up	6.22507	6.0918	7.54228	7.18009	5.83089	5.54101	5.08493	5.80927	5.50091	5.91513
ENST00000604849	KANTR	0.00835464	0.214602	2.08582	up	7.62987	8.15223	7.24211	6.94507	6.91416	6.35123	5.86028	7.03731	6.20157	6.12999
FTMT25400005109	CATG00000022043.1	0.00297007	0.171452	2.14282	up	4.35962	4.1376	4.70022	4.91557	3.67728	2.93658	3.4984	2.92837	3.65349	3.27588
ENST00000599641	MIMT1	0.0205149	0.259466	2.74759	up	5.70317	4.63626	6.66727	6.58788	4.29923	4.04183	4.31281	4.54585	3.93511	3.76738
ENST00000434868	LINC01422	0.0119556	0.229817	2.39156	up	6.09644	5.66844	7.17013	5.88438	5.12204	4.68204	4.36702	5.47739	4.59735	4.52787
NR_104329	GATA3-AS1	0.00647284	0.20592	2.22178	up	7.74314	8.52896	7.37661	7.00912	7.04002	6.47821	6.00639	6.85991	6.39245	6.20231
ENST00000458377	AC005237.1	0.0495358	0.340934	2.13135	up	7.35533	8.43407	6.82126	5.88972	6.6925	6.17672	5.48459	6.67044	5.78607	5.61622
ENST00000564922	NAGPA	0.00599373	0.20456	2.00071	up	9.64376	9.58926	8.47645	8.68517	8.96753	8.28756	7.97034	8.45932	7.90963	7.73277
ENST00000557804	VPS33B-DT	5.97424e-05	0.129556	2.15754	up	5.33212	5.40085	5.15715	4.97119	5.02508	4.08615	4.33857	3.63429	4.2022	4.07825
ENST00000648951	LINC01709	0.00821434	0.214602	2.04155	up	8.62142	9.01084	9.15606	7.97294	8.04491	7.73614	7.53705	8.02362	7.32104	7.04002
T377132	G089183	0.00517374	0.197654	2.56838	up	5.84243	6.96708	6.13199	5.48089	5.06187	4.50463	4.18192	5.11156	4.48572	4.39613
ENST00000512349	AC034238.3	0.0410712	0.317527	2.49281	up	8.31148	7.95622	9.93814	10.6203	8.52837	7.83639	7.14421	7.73778	8.22506	7.82221
ENST00000454596	AL117378.1	0.0083384	0.214602	2.00717	up	11.4486	11.8588	11.9923	10.8174	11.1057	10.8419	10.0449	10.9169	10.3121	10.0812
NR_130745	LOC100288778	0.00581904	0.20289	2.00313	up	5.57172	4.89489	5.07226	4.90975	4.13943	3.78573	3.98653	4.3805	3.5275	3.89648
TCONS_00018650	XLOC_009001	0.000817796	0.156914	2.4696	up	9.07068	9.13105	9.10408	8.43723	8.94275	8.12547	7.3157	8.08773	7.02277	7.61274
TCONS_00008604	XLOC_004110	0.000400285	0.156914	3.62521	up	5.86648	5.5974	5.97688	4.44411	4.69339	3.64909	3.33076	3.55509	3.33883	3.41416
T193423	G044560	0.0111041	0.228847	2.15155	up	4.63851	4.40982	3.90397	2.88098	3.91408	2.59356	3.18905	3.09604	2.41835	2.92347
ENST00000496530	SMARCD3	0.0394959	0.314794	2.16549	up	6.8579	6.6368	5.14806	5.18775	4.86589	4.35854	4.64309	5.27123	4.61713	4.23294
ENST00000597199	LINC01480	0.00182145	0.158809	2.46708	up	8.11552	7.7573	8.27271	7.42027	7.52112	6.56443	6.32336	7.39126	6.12641	6.16745
NR_102761	TRIM52-AS1	0.000823352	0.156914	2.06254	up	7.26156	7.30455	7.45041	7.19949	6.8092	6.39831	5.50489	6.38221	6.36424	6.15345
ENST00000562681	AC064799.2	0.0286228	0.282141	2.00319	up	4.69822	5.04128	6.58594	6.15525	5.0548	4.29566	4.35546	4.42308	4.69788	4.7519
ENST00000414790	H19	0.0307745	0.291747	2.12584	up	7.72206	7.04697	7.08446	6.88782	6.30375	5.57908	6.0809	7.1671	5.67775	5.10006
T287840	G067248	0.00507362	0.197651	2.36331	up	4.32012	4.49186	4.67804	5.92424	4.30706	3.26827	3.49768	3.90727	3.27282	3.57124
ENST00000568031	AC134312.5	0.00236281	0.163701	2.06735	up	5.46016	4.91182	5.13776	4.19735	4.57185	3.6036	3.89738	4.00227	3.55146	3.98531
ENST00000453714	AC012370.2	0.0472721	0.334752	2.05665	up	5.39192	5.18615	5.82673	5.91341	3.56015	3.93116	4.18883	4.43906	4.35295	3.76487
ENST00000569908	PWRN1	0.00122417	0.156914	2.09566	up	6.17085	6.27443	6.2614	5.45282	5.71601	5.15602	4.72499	5.32301	4.77643	4.55803
NR_073144	PGR-AS1	0.0119804	0.229817	2.34534	up	4.16324	3.54933	4.93891	4.98945	3.34275	2.7493	3.27155	2.57348	3.45257	2.78778
ENST00000515186	AC105345.2	0.00817285	0.214602	3.10153	up	6.81104	7.80973	7.09016	5.70859	6.10613	5.14926	4.19084	5.98899	5.09409	4.93755
ENST00000455228	LINC01940	0.00396245	0.188395	2.32645	up	6.5482	6.98929	6.23442	5.50235	5.72257	4.92079	4.54178	5.42214	4.96617	5.0553
ENST00000506014	LINC00461	0.000794124	0.156914	2.24492	up	6.62197	7.24507	7.38336	7.21428	6.73738	5.52964	5.42555	6.22138	6.09106	6.10112
ENST00000548955	AC083805.1	0.028871	0.283192	2.15574	up	9.20901	9.38677	10.8063	11.0692	9.39247	8.84585	8.41442	8.86673	9.05983	9.13597
ENST00000531470	MIR100HG	0.00510582	0.197654	2.76147	up	6.09465	6.89121	6.72294	5.69089	5.65058	5.12059	3.84567	5.44159	4.95217	4.36309
ENST00000416398	ZNF503-AS1	0.0103465	0.225508	2.07964	up	6.61343	6.19546	7.72712	6.62656	6.10353	5.75627	5.08815	5.78666	5.60833	5.74502
HSALNT0262809	ZIM2	0.0222524	0.262702	2.18131	up	4.59685	4.02163	5.21594	5.84552	4.38439	3.59725	2.94326	3.58283	3.9726	4.34241
ENST00000562506	AP003071.3	0.0237675	0.267865	2.37395	up	4.68204	4.40795	5.90466	6.20667	4.01121	3.80968	4.20565	3.47802	3.88945	3.59327
T105520	G024915	0.00298754	0.171452	2.01837	up	4.55812	5.42796	5.29747	4.37475	4.56868	3.5542	3.74615	4.19005	3.72223	3.94839
ENST00000629794	AL353658.2	0.0298073	0.2875	2.00651	up	2.97471	3.75671	4.61645	4.64497	4.06527	3.31727	2.6189	3.63653	2.41835	3.04363
T277316	G064356	0.0451554	0.32943	2.00776	up	4.29352	5.05431	6.64445	5.49575	5.15458	4.48659	3.65014	4.73896	4.32758	4.41139
ENST00000487102	AC074386.1	0.0169952	0.24794	2.3159	up	9.03189	9.47657	9.02539	8.12757	8.21494	7.80999	6.76718	8.41959	7.87322	6.94851
ENST00000548359	AC027288.1	0.00313219	0.175503	2.06971	up	9.4787	10.2284	10.3655	9.53171	9.90354	9.07868	8.62087	9.44307	8.51107	8.60707
ENST00000580336	LINC00470	0.0106222	0.227267	2.00772	up	6.20547	6.49955	7.58645	7.48181	6.53313	6.14805	5.44852	5.8701	5.85895	5.953
ENST00000591374	AC007993.3	0.0071142	0.207082	2.23542	up	2.97471	4.00041	4.78572	4.31326	3.81054	2.41143	2.89166	3.00935	2.68818	3.08129
ENST00000382225	AC108134.1	0.00331224	0.179199	2.0781	up	4.19101	4.06629	4.78384	3.93447	4.33212	3.39244	3.58283	3.48792	2.41835	3.14987
T224579	G051882	0.027065	0.277897	2.3411	up	2.97471	5.4801	3.7575	4.14173	3.76902	2.93321	2.41549	3.46809	2.41835	2.75199
ENST00000589433	AC006387.1	0.00979117	0.222396	2.40155	up	4.9612	4.91526	4.72941	4.22801	3.34435	3.63259	2.41549	3.60944	3.12782	3.07306
ENST00000430457	AC023590.1	0.00442628	0.195366	2.55576	up	6.09023	6.31035	5.61765	4.99507	5.02078	4.56322	3.48939	4.70467	4.42287	4.08517
ENST00000469268	AC020636.1	0.0228919	0.265116	2.44205	up	6.13282	7.08254	6.50016	5.3574	5.39778	4.84135	3.7417	5.73122	4.99984	4.71612
ENST00000429305	AL596442.1	0.0188081	0.253597	2.06925	up	4.38095	5.12493	4.45978	4.56018	3.56556	3.39344	2.41549	3.4731	3.92558	3.63827
T004293	G000814	0.0376405	0.309681	2.07417	up	5.10322	6.35408	7.04672	5.57908	5.98054	5.31169	4.68719	5.79237	4.31489	4.69486
ENST00000527970	AC127526.2	0.00245555	0.163701	2.27196	up	9.88845	10.5066	10.5372	9.37546	10.0915	9.14864	8.7688	9.41625	8.57201	8.57383
T169064	G039264	0.00592242	0.203592	2.03309	up	5.55332	5.06187	6.31214	5.70436	4.79699	4.51586	4.23587	4.4625	4.72301	4.37307
TCONS_00018373	XLOC_008653	0.0301155	0.289332	2.25586	up	8.3417	7.95335	9.52232	10.1497	8.20647	7.67828	7.33882	7.48563	8.1381	7.66431
ENCT00000079441	CATG00000005878.1	0.00696721	0.207082	2.25794	up	7.15104	7.19498	8.28123	8.18238	6.91662	6.55026	5.91193	6.07564	6.74215	6.57125
ENST00000420563	AC053503.2	0.00679714	0.207082	3.29715	up	7.16304	8.54533	7.71023	6.80717	6.52408	5.82268	4.60244	6.48951	5.8622	5.36693
ENST00000430184	AL357033.2	0.00806588	0.214377	2.28454	up	4.8008	5.67803	5.64046	4.8192	5.08911	4.19863	3.17841	4.79612	3.6113	4.28363
ENST00000430719	AC007308.6	0.020943	0.259524	2.29546	up	7.77426	7.86578	6.39167	5.93235	6.58411	6.03301	5.48448	6.06328	5.73897	5.2345
ENST00000525578	MRVI1-AS1	0.00737093	0.208746	2.11127	up	8.99318	9.04329	9.63606	9.97263	8.75585	8.18282	7.43844	8.43234	8.58463	8.37224
T270135	G062591	0.00947377	0.218716	2.52591	up	5.09743	4.54627	5.65311	5.84029	4.12227	2.87525	3.63633	3.94566	4.04663	4.07151
ENST00000519630	AP002852.1	0.0283573	0.28115	2.25594	up	6.67582	7.02605	8.56166	8.27833	6.9321	6.32945	5.50539	6.48128	6.69452	6.59469
ENST00000524275	AC104257.1	0.0019237	0.158809	2.25359	up	9.8851	10.4422	10.5328	9.47422	9.89462	9.05405	8.69151	9.4425	8.68741	8.49232
TCONS_00013683	XLOC_006345	0.0127821	0.23395	2.51133	up	8.12064	8.77593	7.97209	7.27153	7.48254	6.75889	5.84074	7.69493	6.61317	6.07272
ENST00000557528	AC026495.1	0.0401179	0.316089	2.41105	up	5.51624	6.84398	7.23721	6.20858	5.96044	5.43967	5.1195	6.16906	3.60723	5.08269
ENST00000442226	UBXN10-AS1	0.00236646	0.163701	2.079	up	5.45408	4.75094	6.04151	5.53983	4.94014	4.43479	4.08633	4.21699	4.49117	4.21778
ENST00000644500	AL365184.1	0.0131075	0.235137	2.03827	up	6.54876	7.26031	7.38692	6.15323	6.69698	5.98686	4.98045	6.34985	5.93669	5.65562
NR_108107	FAM230B	0.00148137	0.156914	2.96991	up	6.21764	7.44146	8.01203	7.383	7.61611	5.88304	5.66008	6.08923	5.26498	5.92083
ENST00000416366	LINC00174	0.000409675	0.156914	2.02505	up	10.3815	11.0484	11.2513	11.2146	10.9896	10.0702	9.90941	10.1757	9.70555	9.93479
ENST00000541243	RERG-AS1	0.00850932	0.214602	2.06309	up	4.66003	5.68277	4.43438	4.36996	4.45555	3.96737	3.16011	4.14344	3.64003	3.46773
ENST00000566297	LINC01686	0.00157146	0.157752	2.01271	up	5.24066	6.33511	5.82851	5.48214	5.44975	4.80741	4.3824	4.94334	4.57848	4.57886
NR_033846	LINC00841	0.0118196	0.229227	2.09035	up	5.88124	5.75299	7.31398	6.52565	5.69179	5.27946	4.80409	5.11743	5.48856	5.15739
ENST00000523682	AC064802.1	0.00654857	0.206715	2.02173	up	9.73522	10.5324	10.6463	9.74615	10.2932	9.45797	8.88967	9.8322	8.90151	8.79401
ENST00000648691	AC020907.1	0.0473811	0.334752	2.27449	up	10.453	11.0181	9.4345	8.48124	9.48563	9.11545	8.10487	9.24449	8.42489	8.05503
ENST00000415503	AC006547.1	0.0254671	0.272278	2.07211	up	6.97383	6.63413	6.63258	7.65421	5.36091	5.81637	5.43589	5.55259	5.81277	5.38256
ENST00000582092	SS18	0.00800964	0.213999	2.26693	up	8.20432	8.30681	9.22908	9.09161	7.50393	7.36183	6.8452	7.47256	7.4865	7.26595
MICT00000164077	CATG00000036569.1	0.00278123	0.168305	2.00743	up	9.2438	9.68646	10.4959	9.70817	9.71639	8.95263	8.52644	9.14539	8.66194	8.53759
T234043	G053835	0.00984687	0.222396	2.03478	up	4.38103	5.71485	5.55297	5.4253	4.52703	4.36764	3.66558	4.17593	3.96977	4.29791
ENST00000521131	AC009446.1	0.00526352	0.199378	2.00058	up	10.9212	11.2399	11.7606	10.709	10.9366	10.5381	9.70936	10.6077	9.8736	9.83653
T027892	G006271	0.0150381	0.243303	2.1497	up	5.1974	5.67942	6.26466	4.4135	5.10799	4.50611	3.75197	4.76958	4.11419	4.00041
TCONS_00004747	XLOC_001426	0.00536941	0.201109	3.73874	up	5.80478	6.81138	5.68871	5.38964	4.27062	4.09612	2.73493	4.3858	3.90053	3.33498
ENST00000591053	MIR7515HG	0.00938514	0.218716	2.84421	down	2.97471	4.61487	3.46112	4.30701	5.31104	5.43415	6.20565	5.60883	5.27896	5.6813
ENST00000608176	AC073529.1	0.00616865	0.205067	2.01818	down	2.97471	3.10348	2.6831	2.88098	3.65876	3.43802	3.97496	4.37341	3.85868	4.72126
compmerge.2637.pooled.chr20	MIR663AHG	0.0472784	0.334752	2.16351	down	2.97471	5.00917	2.6831	2.88098	4.32361	4.55074	4.51273	4.457	4.86949	5.04849
MICT00000098001	CATG00000017845.1	0.0203843	0.259466	2.13533	down	2.97471	3.99768	3.82041	2.88098	4.51365	4.60174	4.00657	4.74755	5.00772	5.29617
ENST00000400831	LINC02487	0.0144015	0.242412	2.82544	down	2.97471	4.75796	3.43316	4.46565	5.43844	5.30329	6.28984	5.69682	5.39082	5.88153
TCONS_00006111	XLOC_002720	0.000349805	0.156914	2.06796	down	2.97471	2.50407	2.6831	2.88098	2.90054	3.49396	3.76616	3.80144	3.70615	4.41672
ENST00000578800	AP005329.1	0.0357528	0.305959	2.33701	down	2.97471	3.862	4.66797	5.30863	5.52817	5.39728	5.85578	5.48763	5.72298	6.00114
ENST00000440403	AP000320.1	0.03601	0.306358	2.40726	down	10.8072	11.7051	9.36222	9.86003	11.8252	11.8842	12.1517	12.1629	11.5451	12.1529
T244979	G056180	0.0127036	0.233487	2.11832	down	2.97471	4.20107	3.55872	2.88098	4.54865	4.59419	4.55917	4.60132	4.94664	4.87742
ENST00000415141	AL157935.1	0.0124182	0.231989	2.3802	down	7.36898	8.45697	6.94458	7.44885	8.86018	8.74322	9.25049	9.30294	8.67022	9.36812
uc003dtq.3	AF090939	0.0280129	0.279946	2.11938	down	2.97471	4.29053	2.6831	2.88098	2.66063	4.60887	4.41521	4.75257	3.33637	3.79514
ENST00000437308	LINC01762	0.0237517	0.267865	2.18425	down	2.97471	3.40507	3.4233	4.84525	4.54856	4.54488	4.98515	4.75901	4.9218	5.62175
ENST00000424751	LINC00839	0.0284475	0.281569	2.18011	down	10.5534	11.0015	9.28107	9.94514	11.5459	11.3853	11.6942	11.9263	11.1384	11.8049
ENST00000501648	AP001122.1	0.0250146	0.270668	2.37903	down	2.97471	4.90777	3.58307	2.88098	4.65196	5.30918	5.1056	5.17346	4.37054	5.29159
TCONS_00009850	XLOC_004262	0.0258917	0.274376	2.1116	down	2.97471	3.82136	2.6831	2.88098	4.63957	3.94009	4.74569	4.71976	4.3814	4.60447
compmerge.5258.pooled.chr6	AL391807.1	0.0207758	0.259466	2.12441	down	2.97471	4.40165	2.6831	2.88098	4.25234	4.46773	4.59447	4.18515	4.71423	4.66652
T356784	G084179	0.00624097	0.205841	2.15068	down	4.95324	5.13662	4.33786	5.58692	5.98781	5.99691	6.48166	6.4907	6.0991	6.45803
ENST00000635333	AC008691.1	0.000508278	0.156914	2.38779	down	2.97471	3.02112	2.6831	2.88098	3.80686	4.25162	4.72137	4.43565	4.07108	4.16544
ENST00000419183	AC105935.1	0.0214315	0.26159	2.50805	down	6.79411	7.32397	8.5297	8.57461	8.29327	8.80905	9.88378	9.32035	9.81001	8.3253
ENST00000564541	MANEA-DT	0.02005	0.258997	2.00248	down	2.97471	3.74725	2.6831	3.98876	3.89738	4.41157	4.22577	3.77274	4.98144	4.90863
ENST00000447058	AC003991.1	0.000371705	0.156914	2.91061	down	2.97471	3.53333	2.6831	2.88098	3.88116	4.32838	4.62781	4.88502	4.66268	5.15602
ENST00000523870	AP003472.1	0.0296222	0.287098	2.2611	down	9.29547	10.0251	7.95536	8.48906	10.1506	10.2177	10.4665	10.5964	9.9317	10.5883
ENST00000513653	SNCA-AS1	0.0315755	0.293846	2.04855	down	13.3295	14.0809	12.6856	13.0547	14.1343	14.0408	14.1701	15.2658	13.9261	15.0554
ENST00000524708	AP001360.1	0.00482225	0.195947	2.04006	down	2.97471	2.50407	2.6831	2.88098	3.79842	4.16497	3.48352	4.25153	3.85868	4.22564
ENST00000431427	HTR3E-AS1	0.0145062	0.242918	2.30584	down	2.97471	4.45006	4.34466	4.80165	5.146	5.37537	5.37435	5.7837	5.33261	5.87753
ENST00000450750	LINC01639	0.0345068	0.302347	2.94079	down	6.45994	5.87054	7.11276	8.89109	8.18623	8.32292	9.81259	8.65046	8.50934	9.00625
ENST00000508752	FAM198B-AS1	0.0100228	0.2227	2.29979	down	6.83134	7.11514	5.75649	6.6791	7.86711	7.91933	8.09687	8.39199	7.73873	8.10978
T332803	G078032	0.0231593	0.26632	2.11784	down	2.97471	4.16292	3.81048	5.01565	4.396	4.47186	5.12189	5.17624	5.54136	5.46139
T343362	G080668	0.0122384	0.230593	2.47424	down	2.97471	3.69765	2.6831	2.88098	4.80198	4.79446	4.97091	4.28377	4.84787	4.67636
ENST00000574598	TIGD7	0.00387637	0.188199	2.31647	down	2.97471	2.50407	2.6831	2.88098	3.8645	3.73423	4.21265	3.90934	4.27002	4.84076
ENST00000593065	AC005381.1	0.00476443	0.195702	3.27577	down	2.97471	3.32124	2.6831	2.88098	4.07838	3.83332	6.12396	4.88098	5.01511	4.6442
ENST00000648513	AC064799.2	0.014785	0.243303	2.10813	down	2.97471	4.05174	3.71084	2.88098	4.6909	4.46155	4.89167	4.83968	4.67114	4.82493
T361719	G085443	0.0168045	0.247147	2.34821	down	11.2595	11.7387	9.94887	10.4699	12.0151	11.9983	12.4843	12.5693	11.9882	12.5497
ENST00000482728	SMIM4	0.0343162	0.301978	2.0211	down	4.22904	3.84359	3.99097	5.67544	5.18011	5.16839	6.16121	5.35752	5.51624	5.79149
ENST00000554665	AL121852.1	0.0102942	0.225493	2.04499	down	4.72525	5.03799	4.12089	5.68886	5.54398	5.94618	6.48199	5.86334	6.16386	5.82206
ENST00000563734	AC009065.4	0.0178938	0.250754	2.15275	down	5.34039	4.9032	3.90625	5.1772	6.12621	5.96333	6.49849	6.34255	6.14525	6.03454
ENST00000584262	LINC01476	0.0389283	0.313196	2.12893	down	6.23147	7.14739	5.07427	5.17804	6.89648	6.9854	7.26663	7.4684	6.88	7.37788
ENST00000581028	LINC02074	0.0443751	0.327208	2.27655	down	2.97471	5.02227	4.09335	2.88098	5.22897	5.06126	5.08289	5.39351	5.39226	5.20463
ENST00000580756	AP000915.1	0.033575	0.299994	2.24863	down	2.97471	4.6991	4.00064	5.00714	5.44379	5.31211	5.48885	5.89706	5.28633	5.98627
T367518	G086856	0.0143924	0.242412	2.34063	down	2.97471	4.38568	3.68831	2.88098	4.87391	4.76263	5.10454	4.93439	5.04754	5.08899
ENST00000615819	AC097634.2	0.00514644	0.197654	2.06444	down	2.97471	3.59956	2.6831	2.88098	2.88484	4.0493	3.82155	3.36227	4.32255	4.69629
ENST00000615154	AC007786.3	0.00452997	0.195366	2.26146	down	2.97471	2.50407	3.76803	2.88098	3.59931	4.07902	3.87041	4.1721	4.55705	4.93479
ENST00000595902	AC009542.1	0.00159083	0.157752	3.81619	down	2.97471	2.50407	2.6831	2.88098	4.70902	5.0547	5.50579	4.98733	4.85396	5.01076
ENST00000500447	MIR210HG	0.0431121	0.324509	2.89242	down	2.97471	5.33928	3.69485	2.88098	5.51081	5.67803	6.16265	5.45618	6.17883	4.58632
TCONS_00016098	XLOC_007489	0.00657486	0.206715	2.38935	down	6.0184	7.52808	7.48782	6.71419	7.52166	8.1668	8.21026	8.11381	8.97577	8.08662
ENST00000503085	AC133961.1	0.0262209	0.275334	2.11725	down	2.97471	4.66683	4.59447	4.33516	5.2779	5.35028	5.72921	5.66312	5.10537	5.41204
ENST00000504869	THAP9-AS1	0.00548234	0.201463	2.4735	down	4.27674	4.86714	3.4878	4.49801	5.55026	5.80308	6.01152	5.92413	5.59546	5.87852
ENST00000528553	AC090124.1	0.0163754	0.246479	2.25936	down	8.08773	8.01384	6.60017	7.38162	8.81298	8.72862	9.14352	9.08491	8.64237	9.17649
ENST00000479395	AL138787.2	0.0176763	0.249318	3.13953	down	2.97471	4.872	2.6831	2.88098	5.23143	5.34863	5.36818	5.0973	5.35476	5.72609
ENST00000609161	LINC00893	0.0327308	0.297608	2.14567	down	2.97471	3.06642	2.6831	4.1088	3.6064	3.44468	5.32798	4.26728	3.92102	4.98562
NR_045680	HEIH	0.0273055	0.278765	2.20536	down	11.39	11.9081	10.0817	10.6542	12.0605	12.1488	12.4741	12.8116	11.7149	12.65
ENST00000535996	MLXIP	0.0220591	0.262702	2.53873	down	10.3797	10.0312	9.7592	10.1112	11.1128	11.0213	11.4082	13.0242	10.6615	11.9995
ENST00000448729	TMEM254-AS1	0.0396253	0.31486	2.06834	down	10.9449	10.1872	8.70268	9.39389	10.6993	10.8678	11.3975	10.9935	10.8928	11.0188
ENST00000449672	AOAH-IT1	0.0113885	0.228847	2.74286	down	2.97471	5.04275	3.60625	2.88098	4.21619	4.98241	5.52036	5.69745	4.64982	5.14926
ENST00000452809	ASH1L-AS1	0.00834318	0.214602	3.18598	down	7.89778	8.37726	6.6187	7.14967	8.8405	9.06737	9.44046	10.3626	8.82497	9.54724
ENST00000587182	MYHAS	0.016761	0.247147	2.02249	down	6.22247	5.19304	4.58563	5.13221	6.15627	6.35079	6.71591	6.20809	6.78387	6.31163
ENST00000502809	AC025465.2	0.033128	0.298949	4.82843	down	9.60488	9.62667	6.8438	7.52952	10.4243	10.4643	10.7694	13.197	9.96201	10.9942
ENST00000531136	AC013762.1	0.0431477	0.324518	2.18184	down	10.5532	11.2728	9.31318	9.58372	11.5776	11.3676	11.7139	11.8941	11.1501	11.8024
T056570	G013086	0.0240185	0.2691	2.58552	down	9.43386	9.9691	7.8764	8.31148	10.2605	10.3586	10.84	10.8952	9.9873	10.6225
ENST00000512647	AC012613.1	0.0352455	0.304842	2.00627	down	8.95586	9.56677	7.6566	7.87126	9.34928	9.6956	9.93234	9.7863	9.46174	9.54638
ENST00000541320	TMEM132D-AS1	0.0396063	0.314806	2.04935	down	10.2432	10.2686	8.44077	9.51922	10.7428	10.6587	10.9915	11.161	10.4928	11.0864
ENST00000441231	PLCB1-IT1	0.000880476	0.156914	2.44654	down	8.58375	8.74398	8.36377	8.60633	9.43102	9.73894	10.4243	10.1227	9.53844	10.3582
T363113	G085780	0.0367573	0.307765	3.59282	down	9.18237	9.16123	5.99831	7.00326	9.63341	9.83871	10.2593	10.6262	9.61598	9.86398
ENST00000523182	RAB11FIP1	0.00275033	0.167224	2.46578	down	2.97471	3.58797	4.06893	2.88098	3.88127	4.62474	4.16908	5.04711	4.76998	5.29318
T371374	G087573	0.023374	0.26658	2.18891	down	2.97471	4.61329	4.50759	4.65571	5.13992	5.33038	5.04159	5.40566	5.75734	6.00732
ENST00000454877	AC020743.1	0.0160071	0.244026	2.16021	down	5.09089	6.44645	5.55377	6.18642	6.71626	6.8252	7.34578	7.41674	6.41917	7.54274
T030645	G006890	0.0063763	0.20592	2.40914	down	2.97471	3.95923	3.45942	4.74636	4.33166	4.6909	5.42495	5.18515	4.99841	5.51457
compmerge.4163.pooled.chr12	AC006065.4	0.0362282	0.306828	2.12308	down	2.97471	4.12005	4.57644	4.7469	5.38406	5.42996	5.58112	5.95507	4.98733	5.27946
T269618	G062461	0.00576187	0.202829	2.82843	down	2.97471	4.41433	2.6831	2.88098	4.4625	4.76871	5.04275	4.93748	4.89643	5.27026
T102993	G024277	0.000766238	0.156914	2.07048	down	6.64078	6.69722	7.03112	7.24249	7.38869	7.66921	8.201	8.16377	7.80939	8.40676
ENST00000558104	RORA-AS2	0.00639764	0.20592	2.1196	down	2.97471	3.64276	2.6831	2.88098	4.13279	3.91587	4.6427	4.42382	4.31868	4.43224
ENST00000641765	MIR193BHG	0.00579067	0.20289	2.07362	down	4.21722	3.81818	3.7887	4.0821	4.55803	5.00608	4.98745	4.47134	5.96415	5.29596
NR_105008	LOC102503427	0.0122672	0.230657	2.45973	down	7.31667	7.70231	5.94112	6.29161	7.85523	8.05546	8.30239	8.6573	8.04298	8.5413
ENST00000635395	AL355306.2	0.000103258	0.154733	6.39586	down	2.97471	3.16595	2.6831	2.88098	4.50624	5.47868	6.2573	6.45881	5.55866	5.84322
T328651	G077053	0.029672	0.28719	2.05526	down	2.97471	4.45046	3.56251	2.88098	4.72781	4.35192	4.74964	4.75887	4.88765	5.04497
ENST00000432782	PLCE1-AS2	0.00600562	0.20456	2.10029	down	4.51797	4.92811	3.87673	4.49227	5.49336	5.37501	5.93038	5.63913	5.72609	5.99075
ENST00000522264	AL160262.1	0.00223681	0.163507	2.4007	down	2.97471	2.50407	2.6831	2.88098	3.4935	3.58838	4.84626	3.96827	3.88434	4.5664
ENST00000606829	AL590999.1	0.025424	0.272182	2.10774	down	2.97471	4.77849	3.53238	2.88098	4.33639	4.77643	5.04734	4.35697	4.73258	4.96811
ENST00000522464	AC091987.1	0.00522836	0.198624	2.39146	down	2.97471	3.85187	2.6831	2.88098	4.25284	4.68463	4.18628	4.44679	4.67952	4.93576
ENCT00000049262	CATG00000116153.1	0.0143322	0.241872	2.20422	down	2.97471	4.50298	4.07498	4.49312	5.13623	5.12921	5.29578	5.42658	5.46119	5.57062
ENST00000591172	ZNF582-AS1	0.0297814	0.287356	2.04406	down	2.97471	4.19112	4.78171	3.8966	4.37598	4.97248	5.53363	5.40352	5.3055	4.16219
ENST00000422345	BX284668.1	0.0464479	0.332916	2.13217	down	12.3643	12.8174	10.7328	11.2155	12.9545	12.972	13.1632	13.4389	12.6568	13.3154
T180044	G041465	0.0196204	0.25782	2.0126	down	10.7026	11.0933	9.94435	10.1331	11.3439	11.3753	11.6531	12.193	10.9929	12.0483
ENST00000581502	AP005062.1	0.0094371	0.218716	2.13312	down	8.60805	8.63023	7.91783	8.89637	9.64342	9.52713	10.0938	10.0514	9.35537	10.1331
ENST00000439186	AL035706.1	0.0109559	0.228847	2.26528	down	2.97471	3.8418	2.6831	4.12055	4.4999	4.84737	5.03404	4.9172	4.4454	4.77451
TCONS_00018621	XLOC_008974	0.0454529	0.330328	2.01055	down	2.97471	4.78053	4.75056	4.66209	5.48564	5.40225	5.55435	5.44558	5.40712	5.88216
T143531	G033378	0.0112129	0.228847	2.26244	down	9.26512	9.69758	8.23385	8.65071	10.0969	10.1445	10.5249	10.466	10.0284	10.6699
ENST00000449741	SLC26A4-AS1	0.0302368	0.290031	2.20175	down	10.3969	11.1208	9.16326	9.55386	11.1253	11.2155	11.6407	11.7871	10.8689	11.5412
ENST00000499110	AC099508.1	0.0248217	0.270222	2.44032	down	5.73594	6.31092	4.23493	5.19068	6.53772	6.90358	7.33352	7.29707	6.14958	6.7618
ENST00000467830	TRAF3IP3	0.00629159	0.20592	2.65594	down	8.55646	8.67377	7.57181	8.6616	9.73935	9.7013	10.3557	10.3419	9.56726	10.283
compmerge.3113.pooled.chr8	LINC00964	0.0292254	0.285164	2.22623	down	9.90871	10.0158	8.2014	8.73795	10.3938	10.365	10.7802	10.9149	10.268	10.7026
ENST00000561241	TPM1-AS	0.00957979	0.219837	2.71199	down	2.97471	4.28145	2.6831	2.88098	4.52223	4.63821	4.72446	5.39384	4.50576	5.27697
ENST00000593109	ZNF582-AS1	0.00120244	0.156914	2.58172	down	2.97471	3.36409	2.6831	2.88098	4.09001	4.67338	4.72511	4.64178	4.73249	4.06179
TCONS_00026358	XLOC_012710	0.00227246	0.163701	2.28348	down	2.97471	3.11252	2.6831	2.88098	4.09779	4.44182	4.3648	4.44956	3.91439	4.53471
ENST00000523747	AC022784.1	0.0127401	0.233776	2.46905	down	4.32143	4.50565	4.89737	6.30838	5.57029	5.99909	7.01454	6.1652	6.30729	6.6368
ENST00000641674	CASC19	0.00859988	0.214709	2.49026	down	2.97471	4.32413	2.6831	2.88098	4.35065	4.62638	5.10688	4.65514	4.57995	4.82671
ENST00000609089	AC016717.2	0.00290381	0.171239	2.25634	down	2.97471	2.50407	2.6831	2.88098	3.96433	4.01623	4.37523	3.81585	4.40237	4.26744
ENST00000565937	AC009065.5	0.0285207	0.281679	2.03303	down	2.97471	4.13819	3.87174	4.20118	4.93785	4.83729	5.2757	4.97029	5.72719	4.43135
T215907	G049958	0.00407942	0.188894	3.26192	down	8.70525	8.01935	7.60034	9.10928	9.54969	9.90099	11.1996	10.2972	9.85221	10.2625
ENST00000476186	AC084024.1	0.0167611	0.247147	2.06726	down	9.21361	9.29334	7.6843	8.84379	9.61496	9.80676	10.0873	9.87469	9.8215	10.2984
T114617	G027072	0.0157229	0.243303	2.45619	down	2.97471	4.4267	4.14931	5.07166	5.25097	5.58416	6.0761	5.77062	5.2779	5.64668
TCONS_00001692	XLOC_001050	0.0040061	0.188395	2.38325	down	7.00148	7.25932	6.89291	7.44338	8.52735	8.44984	8.98534	8.77986	8.37093	8.80311
NR_036495	LOC646938	0.0146358	0.243303	2.26497	down	6.92644	6.44739	6.5609	7.32828	8.06046	7.94691	9.12399	8.35446	7.72005	8.07552
ENST00000458654	AP001619.2	0.00638375	0.20592	2.32235	down	2.97471	3.74117	2.6831	2.88098	4.40017	4.65488	4.37016	4.72057	4.32299	4.68946
ENCT00000135170	CATG00000021446.1	0.0259909	0.274479	2.79324	down	4.65912	4.67982	2.6831	2.88098	5.11452	5.82206	5.44799	5.64327	4.73738	5.77653
ENST00000539222	AP000797.3	0.0154571	0.243303	2.87463	down	8.74361	8.6353	6.89564	7.83	9.57777	9.50556	9.83921	10.4882	9.37375	10.0925
NR_152600	SNHG6	0.045001	0.329135	2.62827	down	6.9064	7.69623	8.22481	5.93251	7.44509	9.06647	9.22814	9.45421	8.40313	7.02368
ENST00000440189	AC016396.1	0.0177178	0.249496	2.5055	down	2.97471	4.3372	2.6831	2.88098	4.81988	5.11398	4.59115	4.90526	5.03659	4.67439
T001910	G000285	0.0274846	0.279238	2.42015	down	6.49317	7.13938	4.90907	5.24385	7.04492	7.5674	7.40569	7.6906	7.04935	7.49282
ENST00000359941	TP53TG1	0.00464192	0.195366	2.42865	down	2.97471	3.02508	2.6831	2.88098	3.2315	4.64124	4.52464	5.01291	3.28343	3.73395
ENST00000514401	AC006296.1	0.00479798	0.195702	2.37343	down	2.97471	4.02716	2.6831	2.88098	4.07803	4.38417	4.64862	4.27996	4.58537	4.98071
ENST00000430988	AC011239.1	0.03502	0.304842	2.03394	down	6.61161	6.47764	5.41649	7.19787	7.47951	7.31795	8.38953	7.55439	7.40286	7.63978
HBMT00000381335	CATG00000014382.1	0.000274772	0.156914	4.15631	down	2.97471	2.50407	3.39222	2.88098	4.17552	4.55138	5.44031	5.30329	5.43368	5.47536
ENST00000512853	SNX25	0.0260447	0.27462	2.85613	down	5.08269	4.72146	2.6831	2.88098	5.19812	5.55964	5.89235	5.46937	5.71499	5.50032
NR_036557	LOC100506747	8.38961e-05	0.154733	2.27152	down	2.97471	3.3782	2.6831	2.88098	3.37929	4.21938	4.23247	4.02326	4.19626	4.54322
T108308	G025598	0.0201342	0.258997	3.03297	down	2.97471	4.96981	2.6831	4.44109	5.41352	5.68555	5.85091	5.36818	5.56111	6.02016
ENST00000592557	AL031772.1	0.0146514	0.243303	2.83211	down	4.972	6.09486	4.56882	4.25284	6.66807	6.90877	6.73043	6.80851	7.27541	6.34286
ENST00000588890	AL157935.1	0.0173374	0.248742	2.64718	down	4.32116	5.73855	4.02031	4.27996	6.27056	6.28757	6.55789	6.58788	5.86049	6.35897
TCONS_00010357	XLOC_004846	0.0170311	0.248013	2.14659	down	2.97471	3.2735	2.6831	4.17115	4.29401	4.01105	5.00082	4.40339	4.61179	4.87967
T186000	G042688	0.00735039	0.208746	2.08355	down	2.97471	3.8101	2.6831	2.88098	3.96469	4.86152	4.36741	4.10707	4.14086	4.13196
NR_146599	C1QTNF3-AMACR	0.0155769	0.243303	2.057	down	5.10747	5.22292	4.20118	5.95037	5.76414	6.1257	6.67286	6.54291	5.84501	6.26229
TCONS_00003809	XLOC_001608	0.0422005	0.321266	2.24037	down	2.97471	4.63375	4.05725	2.88098	5.25978	5.3156	4.84155	5.20588	4.78881	5.4733
ENST00000464271	LINC00877	0.00406716	0.188894	2.05052	down	2.97471	3.61674	2.6831	2.88098	3.73766	3.87439	4.46659	4.42969	3.80335	4.49913
ENST00000560404	AC010809.2	0.000865245	0.156914	2.22609	down	2.97471	3.20391	2.6831	2.88098	3.90431	4.09827	4.1482	4.32559	4.33099	4.51651
FTMT22400008881	CATG00000085471.1	0.0122954	0.230854	2.49746	down	4.60554	3.87117	2.6831	2.88098	4.36288	4.82691	5.22073	4.63047	5.39741	4.93046
ENST00000593878	SLC8A1-AS1	0.0205534	0.259466	2.2737	down	4.23898	4.16219	2.6831	2.88098	4.5772	4.49739	5.02386	4.70118	4.90427	5.34097
ENST00000586391	AC012301.1	0.0114502	0.228847	2.12876	down	5.22018	5.01681	4.15332	5.36888	5.80771	6.23819	6.26452	5.88193	6.86673	5.7656
NR_110557	LINC02293	0.0181021	0.251805	2.26017	down	2.97471	4.26285	2.6831	2.88098	4.47812	4.75576	4.56914	4.96811	4.22215	4.64677
TCONS_00017292	XLOC_008114	0.00101297	0.156914	2.27881	down	2.97471	3.53275	2.6831	2.88098	3.63727	4.18505	4.30408	4.75639	3.90655	4.49816
ENST00000522743	AP003351.1	0.00774573	0.212578	2.42273	down	2.97471	3.36056	2.6831	4.00951	4.2971	4.31214	5.38323	4.70031	4.37899	4.9335
ENST00000500538	UBA6-AS1	0.00812005	0.214602	2.14657	down	2.97471	3.84746	2.6831	4.09559	3.97905	4.26698	4.57185	4.57429	4.59833	5.07863
T097905	G023046	0.0223642	0.262944	2.13411	down	6.82671	8.2574	8.9946	8.71354	8.54392	9.20323	9.39545	9.30498	9.64376	9.25693
FTMT20600013563	CATG00000051491.1	0.00813707	0.214602	2.17821	down	8.53887	8.93344	8.07855	8.82231	9.69758	9.68053	10.2443	10.2866	9.35566	10.1194
ENST00000565297	AC083837.1	0.0173775	0.248828	2.06669	down	5.68023	6.15367	4.55502	5.25576	6.52631	6.64775	6.80498	6.72466	6.45108	6.77912
ENST00000605740	AC093915.1	0.00330335	0.17909	2.00269	down	2.97471	3.20359	2.6831	2.88098	3.12409	4.1623	3.90812	4.73226	3.45909	3.61439
ENST00000414600	SOX9-AS1	0.0195107	0.257077	3.33785	down	7.04425	6.21673	6.85194	8.91899	8.62176	8.82155	10.2605	8.63774	9.28834	9.3401
ENST00000609823	Z98949.1	0.00759652	0.210976	2.20394	down	2.97471	4.54585	3.76458	3.94028	4.72623	5.10111	5.03197	4.924	5.17942	5.41557
ENST00000562834	AL049555.1	0.00426988	0.19358	2.05526	down	2.97471	2.50407	3.59478	2.88098	3.10744	4.22643	4.63738	4.03857	3.9131	3.4431
ENST00000430529	LINC01865	0.015839	0.243623	2.00128	down	5.25385	5.16677	3.5938	4.40795	5.07197	5.3926	5.77322	5.63983	5.98184	5.71149
ENST00000453470	LINC00297	4.36838e-05	0.126982	3.51684	down	2.97471	2.50407	2.6831	2.88098	3.65384	4.42635	5.1371	4.76657	4.68964	4.74845
FTMT20200008533	CATG00000083467.1	0.0129069	0.234539	2.47703	down	2.97471	4.01434	2.6831	4.45745	4.68731	4.91498	5.08062	4.97848	4.94108	5.44484
ENST00000584273	LINC01956	0.0245525	0.269818	2.0964	down	2.97471	4.33328	3.52133	3.95652	5.03558	4.68368	4.92368	5.16089	4.79375	5.59899
ENST00000608505	ITGA9-AS1	0.00997913	0.2227	2.24865	down	5.59715	5.94706	5.30114	6.50365	7.0001	7.0941	7.6612	7.42325	6.68948	7.32636
NR_034093	MRVI1-AS1	0.0262453	0.275396	2.01677	down	2.97471	4.75317	3.93534	3.98097	5.05757	4.86661	5.33119	5.11963	5.19801	5.24653
ENST00000527564	FLJ20021	0.0129051	0.234539	2.33248	down	2.97471	3.26466	3.92111	2.88098	3.41941	4.60638	5.57658	4.74215	4.06302	3.58206
ENST00000425364	AL360227.1	0.00302543	0.172655	2.24742	down	2.97471	3.82598	2.6831	2.88098	3.9355	4.25866	4.23847	4.49522	4.34437	4.8049
ENST00000578746	TTN-AS1	0.00127402	0.156914	3.01998	down	2.97471	3.8348	2.6831	2.88098	4.16617	4.96287	5.28672	4.93881	4.3483	4.97575
T098120	G023127	0.0369411	0.308206	2.97961	down	2.97471	2.50407	2.6831	5.45345	3.99437	4.59764	6.03437	5.01076	4.30937	5.53318
TCONS_00013448	XLOC_006101	0.00468901	0.195366	3.02239	down	2.97471	3.92993	2.6831	2.88098	4.34006	4.60813	5.03172	4.26055	5.74299	5.14387
ENST00000592536	AC099811.4	0.014623	0.243303	2.3784	down	8.12083	7.62356	6.41298	7.70011	8.76677	8.65365	9.32229	9.08255	8.78742	9.0283
ENST00000447278	VLDLR-AS1	0.00213823	0.163507	2.32339	down	2.97471	2.50407	2.6831	2.88098	3.18065	3.44202	4.95482	4.00639	4.0254	3.87606
T267053	G061812	0.0336376	0.300006	2.16359	down	7.77788	7.9283	6.05924	6.82822	8.37224	8.41071	8.4858	8.92738	8.18366	8.52547
ENST00000479634	MLLT10	0.0179824	0.25111	2.02491	down	2.97471	4.16114	2.6831	2.88098	3.69952	4.54627	4.75728	3.8348	4.5474	3.80298
NR_120666	NRG3-AS1	0.0311703	0.292966	2.29255	down	4.25259	4.28736	2.6831	2.88098	4.9218	5.15796	5.14768	4.50108	4.87851	5.32538
FTMT21000000207	CATG00000063589.1	0.00291493	0.171239	2.91942	down	2.97471	3.72318	3.78931	4.6442	4.93178	5.27658	5.75299	5.46296	5.44311	5.85598
ENST00000560924	LINC02284	0.0183507	0.252245	2.13827	down	2.97471	4.15343	2.6831	2.88098	4.41295	4.26647	4.55385	4.51922	4.38395	4.8639
ENST00000594590	AC010335.1	0.00686587	0.207082	2.10064	down	9.82975	10.1337	9.01621	9.6891	10.5825	10.6289	10.942	11.2039	10.5591	11.2716
compmerge.3433.pooled.chr3	ZBTB20-AS1	0.0370305	0.308222	2.20662	down	2.97471	4.77463	2.6831	2.88098	4.42308	4.69541	4.42578	4.86836	4.35341	5.10274
TCONS_00018119	XLOC_008380	0.0238967	0.26849	2.0131	down	4.30399	5.93327	4.22723	4.88474	5.67177	5.98599	6.19709	6.20726	5.63233	6.04541
T044585	G010325	0.000183843	0.156914	3.41112	down	2.97471	3.3675	2.6831	2.88098	4.07	4.77244	5.22497	4.90202	4.68088	5.24721
ENST00000501122	NEAT1	0.0315552	0.293846	3.47473	down	2.97471	6.65924	5.46257	5.05384	6.7771	7.17295	7.36274	7.21011	7.12508	7.04108
ENST00000456299	SOX5	0.0252933	0.271649	2.15918	down	2.97471	4.2754	2.6831	4.12237	4.69729	4.59335	5.22547	4.87636	4.72365	4.88646
ENST00000565495	AC103876.1	0.0121919	0.23024	2.00709	down	2.97471	3.74918	3.63358	2.88098	4.43597	4.08909	4.86345	4.70089	4.49014	4.55641
ENST00000515086	AC112192.1	0.000427306	0.156914	2.11014	down	2.97471	2.50407	2.6831	2.88098	3.53453	3.9384	4.18962	3.79769	4.08598	3.95241
ENST00000621929	AC009163.6	0.023092	0.2662	2.19183	down	7.12486	6.68056	7.59832	8.64102	8.06625	8.38953	9.51582	8.69271	8.3417	8.83193
NR_103733	AC159540.1	0.0177376	0.249508	2.30173	down	4.47489	4.99404	5.1829	6.50734	5.99485	6.34156	7.18237	6.78929	6.17223	6.68215
ENST00000587979	ZNF582-AS1	0.0121776	0.23024	2.11536	down	6.01778	6.20137	6.50279	5.42356	6.72496	7.32998	7.672	7.39196	7.59359	6.28747
ENST00000625515	SATB1-AS1	0.0116723	0.228847	2.11724	down	7.58264	7.75459	6.80117	7.77739	8.55345	8.68026	9.0412	9.1991	8.14629	8.81332
ENST00000436803	LINC00472	0.0343791	0.301978	2.05682	down	2.97471	5.2871	3.83581	4.39366	4.85571	5.44639	5.30538	5.18926	5.1507	5.45736
ENST00000551729	AC026116.1	0.00492468	0.195947	2.05363	down	2.97471	2.50407	2.6831	2.88098	3.74024	4.20989	3.5396	4.00705	3.73449	4.48298
ENST00000416182	AF241725.1	0.0213262	0.261165	2.4795	down	11.3361	11.8246	10.4607	10.9975	12.1008	12.2734	12.2745	13.8602	11.8544	13.0075
NR_038277	PRKG1-AS1	0.048714	0.338591	2.26351	down	8.01953	7.97924	5.85428	6.93589	8.67852	8.4029	8.83917	8.97338	8.46426	8.68056
ENST00000428681	AC093495.1	0.0102881	0.225493	3.73749	down	5.19828	4.68017	3.80344	5.91702	6.48175	6.66495	8.39164	6.79295	6.68489	7.05658
ENST00000609091	AL354694.1	0.0149035	0.243303	2.14609	down	4.49186	4.36336	5.33552	5.80857	5.67689	5.79237	6.85595	6.26886	5.86572	6.40186
ENST00000412084	LINC02470	0.040533	0.316471	2.58193	down	2.97471	5.29633	2.6831	2.88098	4.86648	5.20157	5.20298	4.77543	5.27477	5.08911
NR_037631	AC009414.2	0.0441923	0.326361	2.14445	down	6.30583	6.77388	4.55353	5.59812	6.96832	7.08701	7.46886	7.37762	6.67843	7.09082
ENST00000439700	AC104695.1	0.00547492	0.201463	2.26969	down	2.97471	3.82878	2.6831	2.88098	4.15192	4.76351	4.77028	4.2598	4.18319	4.45519
ENST00000586769	AC012593.1	0.0167835	0.247147	3.5062	down	2.97471	5.14653	2.6831	2.88098	5.36854	5.45754	5.74843	5.70902	5.34186	5.84655
ENST00000513815	LINC00491	0.0422435	0.321266	2.15981	down	12.0852	12.9116	12.219	12.25	13.4828	13.3096	13.5399	14.8313	12.6359	14.1864
ENST00000474886	CFLAR-AS1	0.0387292	0.313074	2.59524	down	2.97471	3.04231	3.73352	5.80701	4.43156	4.8772	5.89335	5.16328	5.20463	5.72997
ENST00000615146	AC034102.8	0.014852	0.243303	2.54234	down	2.97471	4.15627	4.25183	5.13302	5.22426	5.50361	5.51213	5.70729	5.46073	6.28713
NR_144629	AC021218.1	7.0879e-05	0.141883	2.25925	down	5.38835	5.53774	5.48548	5.7932	6.15036	6.7529	6.83349	7.03227	6.6187	6.99699
NR_132791	AL731568.1	0.0116799	0.228847	2.00141	down	6.61225	7.20268	6.66699	8.01384	7.83191	7.99556	8.47313	8.44501	8.02014	8.39892
T011847	G002513	0.0012296	0.156914	2.13204	down	2.97471	2.50407	2.6831	2.88098	3.79826	4.06611	4.08439	4.02285	4.00172	4.12725
MICT00000314054	CATG00000090564.1	0.0172854	0.248742	2.05422	down	5.38936	6.17577	4.82601	6.01709	6.7857	6.70364	7.02149	6.85734	6.69261	7.11178
compmerge.2052.pooled.chr9	AL589843.1	0.00561674	0.202624	2.0146	down	7.09724	6.85734	6.01416	6.82986	7.56772	7.71414	8.2193	7.96436	7.77841	7.74258
T262078	G060285	0.0267775	0.277042	2.26865	down	4.73458	4.36165	2.6831	4.42563	5.25132	5.44283	5.50284	5.6337	5.24475	5.54136
ENST00000585604	SYT4	0.02871	0.282549	2.04389	down	2.97471	4.38133	3.80318	2.88098	4.53961	4.13852	4.94415	4.77489	4.6727	5.20617
ENCT00000044810	CATG00000111123.1	0.0489676	0.33938	2.03579	down	2.97471	5.0041	3.8735	2.88098	4.64512	4.8515	5.01007	4.88935	5.21568	4.53976
T181349	G041732	0.00217848	0.163507	2.1927	down	4.74449	5.39463	4.73071	5.13894	5.97574	6.11432	6.6621	6.16879	6.19483	6.50799
ENST00000455399	PTCHD1-AS	0.0473624	0.334752	2.1167	down	2.97471	4.96835	2.6831	4.25866	4.54432	4.82221	5.27136	4.85757	4.6943	5.19279
ENCT00000202614	CATG00000038721.1	0.0258127	0.274073	2.28475	down	6.79432	6.06472	4.82201	5.74569	7.21161	7.15718	7.64679	7.46939	6.90599	7.4192
T171624	G039830	0.0202846	0.259466	2.0235	down	6.46105	6.9363	5.38662	6.67343	7.13734	7.39663	8.00711	7.81329	6.99604	7.46593
ENST00000420587	GNG12-AS1	0.00995967	0.2227	2.00579	down	2.97471	4.10021	2.6831	2.88098	3.33091	4.32509	3.95425	4.19287	3.78063	4.73793
TCONS_00013698	XLOC_006356	0.0178574	0.25048	2.13105	down	2.97471	4.31244	2.6831	2.88098	4.13591	4.32636	4.08942	4.54302	4.89178	4.5944
ENST00000425887	AC008268.1	0.0035672	0.185277	3.2476	down	2.97471	4.00735	2.6831	2.88098	4.78044	5.04264	5.46733	5.29535	4.79484	5.2233
ENST00000459855	AC046136.1	0.0121336	0.229973	2.38589	down	6.0936	7.21126	7.87556	6.96808	7.6114	8.32977	8.80023	8.11692	9.05903	7.72658
TCONS_00001629	XLOC_000964	0.023406	0.26658	2.02091	down	2.97471	4.1482	4.29217	2.88098	4.37098	4.49717	5.26657	4.80033	4.41448	4.76351
ENST00000491969	TYW1	0.0404972	0.316471	2.56865	down	6.78387	7.3728	6.22941	6.28612	7.07135	10.1501	7.73584	7.63265	7.49372	7.53631
T243634	G055873	0.011186	0.228847	2.29796	down	4.61487	3.7857	3.4491	4.88963	5.14204	5.04887	6.0609	5.60386	5.42796	5.7415
ENST00000533708	RAB30-AS1	0.00143972	0.156914	2.00866	down	2.97471	3.44597	3.55253	2.88098	3.74826	4.20531	4.66102	4.59735	3.99999	4.16994
ENST00000421077	AL441943.2	0.033263	0.29915	2.5444	down	5.30202	5.41075	3.61505	2.88098	5.23212	5.8583	5.88805	5.75232	5.63276	6.04612
NR_111003	LOC642943	0.0496664	0.340975	2.46077	down	10.8441	11.0775	10.9517	11.0788	11.9588	11.6949	12.0689	14.1701	11.2952	13.1774
ENST00000500843	AC090204.1	0.0189275	0.254296	2.23048	down	2.97471	2.50407	2.6831	2.88098	3.42532	4.1721	4.74139	4.79202	3.71299	2.83644
ENST00000510751	SPDL1	0.0366562	0.307216	2.11004	down	9.64977	10.5817	8.61681	9.15862	10.6409	10.7148	10.9878	10.9853	10.1921	11.1542
NR_036473	RCC1	0.0201268	0.258997	2.11111	down	2.97471	3.03437	2.6831	2.88098	2.40763	3.24489	4.5649	3.00262	4.80735	3.75104
MICT00000071289	CATG00000007614.1	0.00244937	0.163701	3.74007	down	2.97471	4.39613	2.6831	4.24073	4.71423	5.24808	6.23673	5.66582	5.58098	5.79262
ENST00000429567	AL353693.1	0.0109206	0.228847	2.0587	down	2.97471	3.33157	2.6831	4.02716	4.20542	4.13962	4.61592	4.72074	4.28501	4.66934
ENST00000438026	AC108879.1	0.00817076	0.214602	2.94289	down	7.6546	7.09752	5.97816	6.42575	8.25627	8.26991	8.89017	9.07802	8.18188	8.77849
ENST00000532315	MIR100HG	0.0425482	0.32215	2.36074	down	11.4501	12.4233	10.7359	10.8714	12.4164	12.4347	12.4948	14.0154	11.9244	13.2242
FTMT21000006204	CATG00000066135.1	0.0118925	0.229754	2.19711	down	4.82743	4.48466	5.10006	5.6337	5.47295	5.69957	7.25205	6.14133	5.74808	6.3558
T224056	G051725	0.0138631	0.238935	2.42027	down	2.97471	3.92177	4.56145	5.25259	4.93839	5.59831	5.63991	5.69166	5.6199	5.47499
ENST00000415193	LINC01047	0.00136051	0.156914	2.15018	down	2.97471	2.50407	2.6831	2.88098	2.89166	3.65447	4.71623	3.81232	3.78178	3.492
ENST00000602602	LINC02603	0.0114908	0.228847	2.28694	down	7.90508	8.3207	6.77981	7.82188	8.72169	8.89204	9.4649	9.42899	8.57424	9.15606
NR_110109	CASC18	0.0167746	0.247147	2.87771	down	7.57735	6.94042	7.2202	8.97577	8.93794	9.19456	10.4855	9.32473	8.96194	9.30954
ENST00000521197	HOXA-AS3	0.00140338	0.156914	2.02171	down	2.97471	3.85966	3.44735	2.88098	3.75402	4.3671	4.31244	4.20344	4.66033	4.45127
ENST00000585536	AC015911.2	0.0129842	0.234807	3.29199	down	2.97471	4.81114	4.78589	5.26835	6.22117	6.52996	6.49425	6.83917	6.13313	6.65956
ENST00000420255	LINC01687	0.0233212	0.26658	3.03548	down	2.97471	4.61952	2.6831	4.98515	5.57379	5.53968	5.88972	5.82487	5.71214	5.87948
ENST00000517733	LINC01484	0.0401685	0.316089	2.10051	down	4.76343	4.49087	2.6831	4.33833	5.18566	5.07067	5.54738	5.20899	5.53287	5.45519
ENST00000554829	AL121790.1	0.0253299	0.27193	2.74539	down	4.52053	5.19125	4.14119	2.88098	5.98518	5.94644	6.27637	5.96276	5.66304	6.15557
T279517	G064902	0.0305178	0.291159	2.04391	down	2.97471	5.02855	4.26884	4.23513	5.12957	5.4833	5.13179	5.25889	5.36432	5.55515
T334291	G078377	0.0205441	0.259466	2.00677	down	2.97471	3.83343	2.6831	2.88098	4.05626	3.81173	4.51317	4.11349	5.01473	3.99976
ENST00000348386	CAST	0.0096166	0.220487	2.92621	down	2.97471	4.89406	4.28036	5.10589	5.52194	6.01683	6.39424	6.22644	5.70667	6.17795
uc003ibp.1	AX747415	0.0172822	0.248742	2.13911	down	2.97471	3.65021	3.83191	2.88098	4.56064	4.77562	4.12725	5.13025	4.29688	5.05349
T378657	G089593	0.002121	0.163507	2.01569	down	11.8809	13.0027	12.4389	12.6317	12.7878	13.3379	13.4041	13.3494	13.778	13.9291
ENST00000608243	AC104458.1	0.00686784	0.207082	2.15478	down	2.97471	3.52519	3.79974	2.88098	4.45609	4.60117	4.27822	4.61529	4.9044	4.77535
ENST00000624295	SNHG5	0.0207368	0.259466	3.07094	down	2.97471	2.50407	2.6831	2.88098	3.76487	4.97428	6.39757	4.17326	3.95975	3.39628
ENST00000588766	AC090386.1	0.00893888	0.215077	2.19911	down	5.12355	6.15323	4.87358	4.72074	6.02654	6.56617	6.74558	6.59827	6.72107	5.95118
ENST00000595925	AC109587.1	0.00724151	0.208046	2.21523	down	2.97471	4.28695	2.6831	2.88098	3.64894	4.26116	4.81153	4.6212	4.1277	4.39038
T380148	G090054	0.0134761	0.237734	2.08537	down	7.83674	7.83763	6.54452	7.18921	8.44728	8.54939	8.75831	8.83228	8.34257	8.67435
ENST00000519935	HOXA10-AS	0.0315826	0.293846	2.20893	down	8.25357	7.9319	8.34257	9.30798	9.53261	9.41059	10.9665	9.91681	9.25882	9.53261
FTMT23000005116	CATG00000103484.1	0.0106865	0.227946	2.05087	down	2.97471	3.732	2.6831	2.88098	4.15488	4.32548	4.01105	4.51218	4.0315	4.72665
FTMT23100012643	CATG00000099437.1	0.0083654	0.214602	2.33593	down	5.22097	6.29384	4.68853	4.68368	6.18786	6.63561	6.64445	6.71746	6.60693	6.59039
NR_123724	PEA15	0.00952921	0.219256	2.27203	down	2.97471	4.08647	2.6831	2.88098	4.2224	4.30005	4.62409	4.76981	4.20598	4.86766
ENST00000523626	KCTD21-AS1	0.00149617	0.156995	2.51395	down	2.97471	3.20346	2.6831	2.88098	4.15677	4.64785	4.74313	4.10596	4.6143	4.43757
ENST00000521399	SNHG6	0.0418332	0.319808	2.67211	down	6.3851	6.58772	7.55898	5.56003	6.9235	8.34094	8.92189	8.98423	7.42239	6.43579
ENST00000523064	RGS20	0.0364602	0.306828	2.10725	down	2.97471	2.50407	2.6831	4.39387	3.55381	3.90145	5.26336	3.96646	3.9571	4.39802
T381217	G090369	0.0297333	0.287356	2.40587	down	4.56213	4.91845	3.81787	2.88098	5.61289	5.62747	5.50842	5.55306	5.43094	6.00521
ENST00000599486	LINC02135	0.0181236	0.251805	2.02449	down	2.97471	3.31638	2.6831	4.24321	4.38818	4.61005	4.51037	4.62995	4.57886	4.36416
T280304	G065137	0.00567353	0.202624	2.42276	down	2.97471	3.80852	2.6831	4.2009	4.37568	4.74894	5.03416	4.74845	4.84525	5.04937
TCONS_00001844	XLOC_001229	0.00353122	0.184619	2.1524	down	2.97471	4.02518	3.79612	2.88098	3.92345	4.39538	4.87508	4.43895	4.48153	4.93921
ENST00000617867	AC243585.1	0.0393332	0.314068	2.30058	down	7.21762	6.81376	4.85367	6.42955	7.56865	7.63239	7.96746	8.13985	7.39591	7.75763
FTMT22100000681	CATG00000090843.1	0.0118859	0.229754	2.20501	down	2.97471	4.3692	2.6831	2.88098	3.79698	4.45037	4.71706	3.9409	4.77418	4.52639
ENST00000579125	ARHGAP27P1-BPTFP1-KPNA2P3	0.0384696	0.312877	2.25137	down	4.51783	4.35762	2.6831	2.88098	4.51557	4.86176	5.84009	4.54178	4.66585	4.89965
ENST00000426818	AL590378.1	0.0245466	0.269818	2.57732	down	9.06564	8.92189	6.97655	8.05639	9.68777	9.5933	10.2611	10.2475	9.54888	9.88676
ENST00000648888	AL592429.2	0.0144767	0.242736	2.02642	down	2.97471	3.93584	3.8721	4.69788	4.46232	4.70792	5.0915	4.94528	4.80165	5.49118
ENST00000590006	MIR7515HG	0.0114317	0.228847	2.90717	down	2.97471	4.07896	2.6831	4.60357	5.02227	5.15266	5.41515	5.63881	5.10553	5.74854
ENST00000524376	MIR100HG	0.0259281	0.274413	2.56934	down	11.5893	12.2886	10.8905	11.1573	12.5486	12.5778	12.6611	14.2049	12.1408	13.6967
BIG-lncRNA-1381.1	BIG-lncRNA-1381	0.00172442	0.158809	2.00795	down	2.97471	2.50407	2.6831	2.88098	3.3541	3.63079	3.86248	3.87185	3.56706	4.4934
ENST00000366209	LINC01320	0.00891896	0.215077	2.35495	down	5.31967	6.0516	4.47573	5.60866	6.28505	6.74395	6.7879	7.08727	6.1706	7.12949
ENCT00000196188	CATG00000037074.1	0.0397782	0.315402	2.35155	down	6.44155	6.13313	4.57176	4.38327	6.71733	6.91549	7.20749	6.98761	6.46534	6.83917
TCONS_00006372	XLOC_002988	0.0258138	0.274073	2.28572	down	2.97471	4.18217	2.6831	3.92253	4.92415	4.44393	4.85367	4.95018	4.98697	5.41515
TCONS_00028347	XLOC_013696	0.00465737	0.195366	2.32565	down	2.97471	4.13013	3.52088	2.88098	4.45711	4.76376	4.6945	4.77165	4.91113	4.91094
ENST00000608358	AL158071.4	0.00835921	0.214602	2.14443	down	4.38892	5.22605	4.9952	5.67262	6.17207	6.20786	6.26027	6.39799	6.34821	6.74353
TCONS_00015147	XLOC_007190	0.0493306	0.339999	2.03306	down	5.89987	5.38571	5.31032	6.81464	6.80295	6.46248	8.08916	7.27475	6.53083	6.97454
ENST00000582145	GARS-DT	0.0182381	0.252245	2.50683	down	6.05622	5.92693	6.11848	7.71484	7.2377	7.47924	8.92591	7.72581	7.54338	8.00916
ENST00000399000	VPS26C	0.0117576	0.228847	2.10709	down	4.34614	5.06217	3.78969	4.60805	5.40887	5.58958	5.85969	5.88654	5.11169	6.14369
ENST00000609553	AC096992.2	0.00677128	0.207082	2.5904	down	2.97471	3.62631	3.53658	2.88098	4.15408	4.43878	4.27312	4.29466	5.2871	5.74486
ENST00000417473	LINC00570	0.0244004	0.269818	2.1655	down	9.43931	9.92607	9.08491	9.01423	10.3427	10.2803	10.4014	11.7495	9.97716	10.9723
ENST00000519375	AC010609.1	0.0132177	0.236239	2.1504	down	2.97471	4.20287	2.6831	2.88098	4.30399	4.50474	4.57123	4.50181	4.48053	4.51037
ENST00000432624	MORC2-AS1	0.0156438	0.243303	2.03839	down	2.97471	4.23804	2.6831	2.88098	4.13899	4.51365	4.25477	4.45644	4.34224	4.48589
T196271	G045232	0.00800673	0.213999	3.19899	down	2.97471	4.8486	2.6831	2.88098	4.63183	5.32538	5.63866	5.25259	5.03647	5.15421
ENST00000593188	AC114488.2	0.014988	0.243303	2.25675	down	2.97471	3.97586	2.6831	4.64043	4.13816	4.51713	5.07265	4.97208	4.79002	4.93163
ENST00000601499	C2orf92	0.0284674	0.281569	2.45162	down	10.8408	10.9216	10.2597	11.0344	11.7103	11.5918	11.9942	13.6502	11.2768	12.7225
ENST00000448260	AC002383.1	0.0164936	0.246944	2.03122	down	2.97471	3.63984	2.6831	2.88098	4.49403	4.32973	4.42138	4.11106	4.41759	4.50463
T199686	G046041	0.0174694	0.248963	2.01564	down	9.01582	10.1608	9.88541	10.0118	10.6566	11.0088	10.7914	11.6451	10.3516	10.9896
TCONS_00007127	XLOC_003061	0.0482855	0.337325	2.26995	down	2.97471	5.36485	3.83156	5.18261	5.45689	5.4743	6.12374	5.78763	5.51682	5.82143
NR_024506	LINC00598	0.0292925	0.285498	2.2964	down	4.55061	5.64569	3.56457	4.16926	5.896	5.90778	6.17672	6.03497	5.60279	6.10072
ENST00000579775	AC090457.1	0.0311905	0.292966	2.65129	down	4.6355	4.61191	4.62833	6.88944	5.88666	6.01131	7.67316	6.56576	6.44362	6.99146
T228924	G052748	0.0391697	0.313696	2.36822	down	2.97471	4.33199	4.00848	5.70541	5.14107	5.03768	6.0988	5.84473	5.54241	5.85705
TCONS_00029736	XLOC_014411	0.0412043	0.31818	2.31771	down	2.97471	4.88988	4.88646	5.28103	5.9087	5.87248	6.25634	6.16238	5.74569	5.96739
ENST00000442823	EPB41L4A-AS1	0.00412221	0.189527	2.39697	down	2.97471	3.45187	3.69279	2.88098	3.83092	5.00967	5.19436	4.31948	4.82295	3.79087
ENST00000608264	BX649601.1	0.0104306	0.226197	2.73362	down	6.84752	6.80267	7.53219	8.55134	8.45771	8.65071	9.8322	9.09076	8.64275	9.22908
ENST00000457427	AL391863.1	0.00865692	0.214709	3.40371	down	7.47256	7.04544	6.63291	8.65404	8.76299	9.02019	10.5469	9.47028	9.01882	9.34732
ENST00000453972	AL121584.1	0.0131	0.235137	2.1832	down	2.97471	3.968	2.6831	2.88098	4.39375	4.42984	4.82234	4.49558	4.15408	4.63094
ENST00000450864	AL356218.1	0.00246561	0.163701	3.28606	down	4.6783	4.60215	2.6831	4.18728	4.69121	5.95196	6.17244	5.56446	5.91269	5.82228
NR_148905	NDUFAF6	0.014392	0.242412	2.40951	down	5.31701	6.16158	5.07481	6.43641	7.07522	6.96224	7.89426	7.36415	6.90102	7.28703
TCONS_00012022	XLOC_005549	0.0044825	0.195366	2.97486	down	2.97471	3.99534	3.53129	5.06234	4.60193	5.16286	6.00297	5.59722	5.38362	5.88304
NR_122123	TSL	0.000779955	0.156914	2.37817	down	2.97471	3.75644	2.6831	2.88098	3.68767	4.16469	4.51594	4.70292	4.32878	4.51982
HSALNT0289253	SNHG6	0.0459063	0.331751	2.87546	down	7.14134	7.08135	8.03715	5.49649	7.52603	8.9625	9.44479	9.53607	7.96707	6.99088
ENST00000457948	AL583824.1	0.032937	0.298241	2.96658	down	8.98148	8.46868	5.94095	7.15888	9.00009	9.19025	9.76589	9.78114	9.18904	9.46777
ENST00000331944	CYTOR	0.0360592	0.306358	2.43824	down	7.24028	7.54746	8.01636	6.56751	7.98858	8.9902	10.0431	8.87968	8.53845	7.33794
ENST00000450535	ZFAS1	0.0240221	0.2691	3.04871	down	2.97471	4.55823	4.45267	2.88098	4.24371	5.83858	6.17577	5.87319	5.57824	3.68553
ENST00000426551	LINC00575	0.00487272	0.195947	2.02807	down	4.93461	5.58907	4.9032	4.7669	6.08942	6.15262	6.19037	6.50297	6.10017	6.43763
ENST00000568229	LOXL1-AS1	0.0067462	0.207082	3.14179	down	6.7857	6.47365	6.32002	8.12205	8.10657	8.3182	9.57063	8.61829	8.49896	9.05983
ENST00000583089	AC090506.1	0.0409319	0.317015	2.14386	down	2.97471	4.85421	2.6831	4.13207	4.49615	5.29722	4.53596	5.10197	4.60484	5.1013
ENST00000644582	SOX2-OT	0.0149001	0.243303	3.07186	down	2.97471	4.71277	2.6831	2.88098	5.12722	5.32381	5.14956	5.04558	5.31759	5.6378
ENST00000590626	AC008569.1	0.0400126	0.315816	2.04121	down	2.97471	3.62433	4.5182	4.33828	4.12373	4.6783	5.60504	5.78705	4.3595	4.29648
ENST00000563172	LINC02582	0.0436423	0.325209	2.21771	down	2.97471	3.56855	5.06298	5.28141	3.76712	5.1373	5.0964	4.8729	5.91541	5.37814
ENST00000511422	AC114284.1	0.0259907	0.274479	2.74374	down	2.97471	2.50407	2.6831	5.02254	3.71599	4.66766	5.74765	4.23551	4.41371	5.1166
compmerge.1592.pooled.chr20	LINC01270	0.0454697	0.330328	2.04059	down	2.97471	3.19547	4.48153	4.88556	4.80792	4.8948	4.86194	4.8601	5.27279	5.60049
ENST00000568788	AC079171.1	0.0189818	0.254296	2.0772	down	2.97471	4.33526	2.6831	2.88098	4.12145	4.42251	4.31822	4.76051	4.15181	4.61568
TCONS_00018162	XLOC_008454	0.00946277	0.218716	2.60383	down	4.25857	4.79288	3.7972	2.88098	5.01076	5.37672	5.50692	5.09478	5.91845	5.74671
T306650	G071654	0.0293254	0.285604	3.42608	down	9.15157	9.12594	6.39345	7.66166	10.0012	9.92833	10.6039	10.7032	9.65463	10.3266
T109723	G025965	0.0322952	0.295713	2.197	down	5.32639	4.05075	3.45208	2.88098	4.66453	5.03924	5.27387	5.0033	5.39575	5.34023
ENST00000624101	AL022323.5	0.0490181	0.33938	2.64177	down	8.80698	8.36435	6.0857	6.84436	9.05617	8.96595	9.70596	9.56292	8.9345	8.99574
ENST00000451126	CASK-AS1	0.00657334	0.206715	2.05197	down	2.97471	3.56304	2.6831	2.88098	4.1173	4.06067	4.19558	4.08454	4.62744	4.43597
BIG-lncRNA-459.1	BIG-lncRNA-459	0.0384555	0.312877	2.44228	down	6.28582	5.71774	4.98271	5.85276	6.55088	6.29452	8.82354	6.85217	7.28979	6.57103
ENST00000617489	MALAT1	0.0311944	0.292966	3.5685	down	11.0565	11.0544	9.14467	9.38225	11.6876	11.6868	11.9882	14.0568	11.2187	12.5515
T362606	G085672	0.0332657	0.29915	2.07866	down	2.97471	3.93625	4.75094	5.17011	4.79375	5.38749	5.21811	5.33714	5.13179	5.82951
ENST00000564875	AC007614.1	0.000981902	0.156914	2.06029	down	2.97471	3.2272	2.6831	2.88098	3.57332	3.93447	4.45569	3.89442	3.8342	4.43479
ENCT00000222744	CATG00000042513.1	0.00317995	0.177579	2.11303	down	8.27403	8.45731	9.54917	9.28529	8.9188	9.72145	9.903	10.2797	9.87051	10.1066
ENST00000505215	AC106864.1	0.00247481	0.163701	2.20554	down	2.97471	3.4461	4.03333	2.88098	3.69884	4.403	4.28246	4.96858	4.25043	4.83517
ENST00000445974	AL589684.1	0.0247209	0.270001	2.45735	down	2.97471	4.28865	4.62612	4.82326	5.49536	5.58595	5.56545	6.29298	5.09108	6.15817
ENST00000648291	AL133268.4	0.0020604	0.162305	3.12913	down	2.97471	3.72899	4.38754	2.88098	4.50764	5.40867	5.01654	5.47868	5.05445	5.75033
ENST00000508590	EPB41L4A-AS1	0.0190963	0.254582	2.80646	down	2.97471	4.54716	4.98945	3.98972	4.84013	6.10509	6.62964	6.00915	5.50451	4.53653
ENST00000419644	AL512444.1	0.0341896	0.301978	2.46683	down	8.33804	7.62006	8.41525	10.1399	9.38476	9.67091	11.036	9.93441	9.60833	10.1616
ENST00000578774	AC080112.1	0.0383199	0.3127	2.04644	down	11.8442	13.1436	11.3294	10.9957	12.7292	13.0594	13.3365	13.0947	12.8296	12.8876
ENST00000498111	ACKR2	0.0266293	0.276858	2.19526	down	2.97471	3.20606	4.2146	4.90637	4.1402	4.72814	5.87631	4.89234	4.6188	4.99832
T150556	G034870	0.000284751	0.156914	3.0906	down	2.97471	3.14205	2.6831	2.88098	3.87523	4.23419	5.09743	4.60849	4.61406	5.14133
ENCT00000137252	CATG00000022030.1	0.0287616	0.282759	2.93175	down	8.18533	8.12547	5.85789	6.36827	8.84301	8.83105	9.2715	9.08436	8.80905	9.14283
T065536	G015095	0.00188519	0.158809	2.01165	down	2.97471	2.50407	2.6831	2.88098	3.6863	3.93526	4.22084	3.75197	3.76821	4.09477
ENST00000585391	AC012593.1	0.0131501	0.235354	3.05596	down	8.12582	8.42266	6.04734	7.36274	8.67759	8.90815	9.67888	9.74855	8.9132	9.44551
MICT00000244847	CATG00000064967.1	0.0494987	0.340769	2.30548	down	7.83897	7.80717	5.51308	6.72928	8.33733	8.18238	8.85506	8.51512	8.20171	8.49689
ENST00000503505	AC092608.1	0.0252363	0.271649	2.68357	down	7.96423	7.68218	5.66863	7.11877	8.65602	8.55725	9.18524	8.91048	8.53444	9.02318
ENCT00000332248	CATG00000072823.1	0.0365395	0.306828	3.12792	down	7.78991	6.9423	4.55774	5.57549	7.9054	8.04052	8.51934	8.12419	8.27657	8.03622
T205483	G047530	0.00174411	0.158809	2.42072	down	2.97471	3.43753	2.6831	2.88098	4.16876	4.24009	4.72705	4.54096	4.46797	4.54619
ENST00000641382	AL033527.5	0.0200951	0.258997	2.03205	down	4.52321	5.55014	4.27518	3.99142	5.60738	5.65225	5.67605	5.54817	6.0267	6.15884
ENST00000501652	LINC01184	0.00170712	0.158809	2.1321	down	4.64089	4.37537	3.61513	4.15729	4.84924	5.07977	5.48295	5.49073	5.3466	5.69925
ENST00000443234	MCHR2-AS1	0.0373984	0.309351	3.38575	down	2.97471	7.09244	4.36298	5.22547	5.71047	6.99772	7.23312	7.02085	6.3018	6.60997
T151531	G035150	0.00852521	0.214602	2.69514	down	2.97471	4.78188	3.54175	2.88098	4.55004	5.14911	5.11181	5.02254	4.94648	5.65122
ENST00000523318	AC103726.2	0.0229656	0.265417	2.12827	down	2.97471	4.17869	2.6831	2.88098	4.37501	4.73505	4.36876	4.83217	3.95967	4.64525
MICT00000208683	CATG00000046847.1	0.0198052	0.258044	2.63923	down	10.3511	9.86877	9.1089	9.09231	10.3005	10.5527	10.9449	12.5554	10.3064	11.3628
ENST00000412196	RP11-782C8.5	0.0246812	0.270001	2.83727	down	4.63424	4.35183	5.18342	6.89564	6.06382	6.40141	7.86601	6.7946	6.39041	7.19903
ENST00000479159	CENPL	0.00147558	0.156914	2.10053	down	2.97471	3.55083	2.6831	2.88098	3.83156	4.19342	4.43486	4.12393	4.38266	4.14007
ENST00000416958	AC118754.1	0.00576771	0.202829	2.28094	down	2.97471	3.47162	2.6831	2.88098	4.14012	4.42298	4.49153	3.74655	4.82306	4.61455
ENST00000418078	AL583808.2	0.0126102	0.233487	2.24594	down	10.6387	10.632	9.64824	11.0213	11.4708	11.4888	12.0408	12.2256	11.2357	12.2567
T272655	G063298	0.0156596	0.243303	2.94938	down	4.46232	5.16969	2.6831	3.94114	5.40771	5.90163	6.14432	5.93854	5.32086	6.16068
ENST00000441356	LINC01920	0.0298992	0.288173	4.36957	down	2.97471	4.06353	4.32892	7.18186	6.05884	6.53398	8.11692	6.86785	6.51645	7.21011
ENST00000617759	AC138932.5	0.0334964	0.299679	2.62817	down	6.90905	6.32704	4.60023	4.72047	7.03338	7.33296	7.76653	7.14421	7.34668	6.97009
ENST00000608240	LINC00484	0.00938642	0.218716	2.22065	down	8.36377	7.93064	6.76145	7.5568	8.61028	8.72749	9.19591	9.18088	8.83193	9.04163
TCONS_00028298	XLOC_013637	0.0037821	0.187696	2.19432	down	2.97471	3.58732	3.52052	2.88098	4.21647	4.21385	4.81481	4.81408	4.21432	4.79182
TCONS_00017365	XLOC_008216	0.0333726	0.299542	2.09939	down	2.97471	5.18764	4.55562	4.75073	5.23713	5.52433	5.77244	5.68918	5.41662	5.65311
ENST00000550035	AC025254.1	0.0130615	0.235077	2.93542	down	2.97471	4.95139	2.6831	3.90165	4.9885	5.56887	5.28518	5.52515	5.21043	5.67754
ENCT00000137497	CATG00000022097.1	0.0176165	0.249201	2.2045	down	2.97471	4.12248	3.49065	4.91469	4.39352	4.80571	5.35909	5.24376	4.62431	5.56545
ENST00000525912	LINC01016	0.00546204	0.201463	2.16933	down	4.80944	5.17852	4.50131	4.66117	5.94904	5.96399	6.3218	6.50345	5.6689	6.2276
ENST00000530249	AC107973.1	0.0259804	0.274479	2.24541	down	8.8066	8.62632	6.83349	7.80665	9.08886	9.06872	9.72145	9.62991	9.19875	9.37799
ENST00000425763	AC107057.1	0.0173371	0.248742	2.13495	down	2.97471	3.88447	2.6831	2.88098	4.52379	4.46611	4.77849	4.21734	4.30604	4.65007
GSE61474_TCONS_00051792	GSE61474_XLOC_010101	0.0354737	0.305067	3.03387	down	11.144	11.1063	8.86407	9.62379	11.7098	11.7239	12.0086	13.2679	11.2004	12.253
T033057	G007500	0.00773519	0.212578	3.21366	down	2.97471	3.13818	2.6831	4.86088	4.42108	4.7247	5.95942	5.16839	5.14781	5.49871
ENST00000413005	AL023495.1	0.0103872	0.226009	2.18046	down	4.58279	5.24177	3.66336	4.14579	5.38979	5.89072	5.69039	5.54136	5.54189	5.98229
ENST00000513259	SNHG4	0.049863	0.341557	2.39674	down	10.3629	10.2858	7.92346	9.13948	10.6225	10.5703	11.3388	11.2371	10.2908	11.2025
ENST00000532890	MIR100HG	0.0322727	0.295648	2.14366	down	11.3515	12.1207	11.028	11.274	12.375	12.3306	12.3084	13.7326	11.9699	13.3081
ENST00000646955	AL357556.4	0.0492218	0.339851	2.09307	down	9.3374	9.37629	7.85035	8.46426	9.67263	9.7602	9.92723	11.0371	9.12537	10.1792
ENST00000602425	LINC01081	0.013767	0.238816	2.34533	down	2.97471	4.69473	3.42558	2.88098	4.52151	4.9678	5.05349	4.85053	4.66249	5.11216
T183271	G042066	0.00116926	0.156914	2.38591	down	2.97471	3.48065	2.6831	2.88098	4.03857	4.43281	4.39988	4.42715	4.32973	4.74115
compmerge.4358.pooled.chr6	LINC01277	0.00604179	0.204584	2.18693	down	2.97471	4.38652	3.54534	2.88098	4.00705	4.84842	4.68542	4.6303	4.37222	4.90279
T354809	G083619	0.0125725	0.233487	2.03163	down	5.05757	5.62535	4.30212	4.86063	6.09723	6.21558	6.27908	6.08994	6.0208	6.4507
ENST00000598149	SATB1-AS1	0.0189646	0.254296	2.42775	down	5.59114	5.89023	4.1561	4.282	5.98369	6.71051	6.73016	6.69584	6.36607	5.79868
ENST00000581125	MAPT-AS1	0.0154615	0.243303	2.32472	down	2.97471	4.04434	2.6831	4.28121	4.0184	4.48284	5.55614	4.89016	4.18633	4.97159
TCONS_00021811	XLOC_010411	0.00198923	0.160496	2.08891	down	2.97471	3.28983	3.39114	2.88098	3.87245	4.3945	4.2745	3.91058	4.25671	4.88657
FTMT23400002268	CATG00000108068.1	0.00176912	0.158809	3.37323	down	2.97471	3.76854	2.6831	2.88098	4.50398	5.05186	5.6478	4.99713	4.59406	5.29113
ENST00000418215	AC000123.1	0.00378422	0.187696	2.33008	down	2.97471	3.84511	3.51288	2.88098	4.11017	4.73002	4.48901	4.43191	4.38618	5.38864
ENST00000457348	LINC01136	0.0274814	0.279238	2.17726	down	6.26692	6.9146	5.08444	5.40307	7.15718	7.06272	7.37817	7.50169	7.06215	7.43406
ENST00000642898	LINC01488	0.0214235	0.26159	2.5119	down	2.97471	3.51233	2.6831	5.02998	4.18333	4.62293	5.68612	4.75751	4.78677	5.17399
ENST00000566745	ADPGK-AS1	0.0243665	0.269818	2.37137	down	13.2298	13.9409	11.9396	12.767	14.0301	14.0646	14.5974	14.8896	13.7326	14.8517
ENST00000650217	LINC02055	0.00709187	0.207082	2.56727	down	4.21331	4.41725	4.75109	5.89196	5.16839	5.81542	7.14739	6.17443	6.13282	5.97311
NR_037142	LOC100289473	0.00718107	0.208046	2.03768	down	8.93239	8.90342	7.96261	9.17573	9.48796	9.55045	10.1047	10.0843	9.65846	10.1989
T208737	G048283	0.00191023	0.158809	2.31772	down	2.97471	2.50407	2.6831	2.88098	3.40835	3.7648	4.0511	4.66777	3.51019	4.52088
TCONS_l2_00005881	XLOC_l2_003139	0.0307967	0.291851	2.25504	down	6.24713	5.1991	5.8614	7.31182	6.69897	6.82784	8.29949	7.66721	6.92045	7.46919
T098692	G023309	0.0318585	0.294618	2.18047	down	8.19547	8.08865	6.34346	7.33296	8.73197	8.65247	9.19119	9.06774	8.50035	8.90395
NR_157226	LINCADL	0.0269798	0.277293	2.73046	down	9.35566	9.62946	8.03143	9.09268	9.73988	10.0817	10.5004	12.2362	9.63881	10.6377
ENST00000457405	AL031275.1	0.00954586	0.219445	2.25609	down	2.97471	3.31585	3.60103	4.69729	4.4517	4.59811	5.22794	4.98672	5.02368	5.07326
FTMT26600002679	CATG00000033947.1	0.0496165	0.340975	3.27356	down	9.97026	10.0851	8.45932	8.83815	10.6891	10.6357	10.8118	13.6227	10.1024	11.4236
ENST00000494880	IVNS1ABP	0.00639284	0.20592	2.74535	down	2.97471	3.74526	3.91147	4.26577	4.45312	4.94404	5.35141	4.94916	6.49877	4.8919
ENST00000627661	TTN-AS1	0.0016284	0.157819	2.20567	down	2.97471	3.30846	2.6831	2.88098	3.63666	3.7712	4.66158	3.86289	4.50321	4.39111
ENST00000455939	LINC00161	0.0205812	0.259466	2.8949	down	5.16875	4.62892	5.13156	7.12949	6.4665	6.78027	8.10877	7.25038	6.68132	7.37204
ENCT00000065928	CATG00000002023.1	0.00483638	0.195947	2.15807	down	5.19837	4.95228	3.85314	4.64298	5.40031	5.72533	6.23881	5.98951	5.6994	5.94274
ENST00000522838	AC099520.1	0.014535	0.243244	2.0355	down	2.97471	4.3206	2.6831	2.88098	3.82585	4.21988	4.52142	4.11369	4.28865	4.6685
T299342	G069975	0.00896767	0.215481	2.08818	down	2.97471	3.60299	3.55796	2.88098	4.10652	4.55029	4.35438	4.87936	3.74259	4.90777
ENCT00000359069	CATG00000080294.1	0.0139534	0.239981	2.87643	down	2.97471	4.90202	5.31895	5.1858	5.65007	6.36159	6.38022	6.43192	5.90688	6.57234
ENST00000418770	AC009961.1	0.024613	0.270001	2.30249	down	2.97471	3.5813	2.6831	4.61568	4.70978	4.65133	4.86108	4.67522	5.00082	5.39209
BIG-lncRNA-1202.1	BIG-lncRNA-1202	0.00875586	0.214709	2.84908	down	2.97471	4.27996	2.6831	2.88098	4.78053	5.10422	4.9166	4.99539	4.71464	5.42091
T196167	G045191	0.0117206	0.228847	2.22132	down	2.97471	4.71009	4.07086	4.05262	4.8558	5.22619	5.27403	5.50409	4.86108	5.55577
ENST00000470191	CCDC171	0.000727846	0.156914	2.47458	down	2.97471	3.30094	2.6831	2.88098	3.98936	4.67114	4.66003	4.27106	4.24468	4.5181
ENST00000547114	MAP1LC3B2	0.0343514	0.301978	3.67652	down	8.77922	8.66642	6.43046	7.08343	9.08078	9.07177	9.70172	11.8265	8.94003	9.89199
ENST00000415477	AL138733.1	0.00191706	0.158809	2.34714	down	2.97471	3.81417	2.6831	2.88098	3.62019	4.51861	4.49832	3.80852	4.70118	4.60106
ENST00000415700	LINC01115	0.0215566	0.261767	2.28749	down	2.97471	2.50407	3.60817	3.93872	4.62707	4.22904	5.04295	5.27136	4.36244	4.71577
ENST00000587445	AC114488.2	0.00726518	0.208046	2.02815	down	2.97471	3.39368	2.6831	4.15541	3.96284	4.3147	4.44956	4.56972	4.36587	4.57072
TCONS_00003906	XLOC_001711	0.00195151	0.159003	2.30493	down	2.97471	2.50407	3.60321	2.88098	3.86865	4.15436	4.43832	4.33155	4.23159	4.69943
T365484	G086399	0.0116223	0.228847	2.496	down	5.6641	5.15003	5.71601	7.04069	6.52778	7.05475	8.18901	7.18622	6.90822	7.35849
MICT00000087025	CATG00000013399.1	0.00676061	0.207082	2.0676	down	4.79526	4.80189	3.61192	4.94003	5.29011	5.64971	5.95609	5.66191	5.67156	5.73973
ENST00000648470	AC090099.5	0.0100245	0.2227	2.05484	down	2.97471	3.96397	3.65815	4.10451	4.74327	4.77951	5.08031	4.57352	5.01291	5.1935
ENST00000554253	AL121694.1	0.0136769	0.238709	3.31168	down	2.97471	2.50407	2.6831	4.25215	3.94677	4.18376	6.55159	4.46168	5.22181	4.57977
ENST00000564487	AGBL1-AS1	0.0388584	0.313196	2.58632	down	2.97471	5.10307	2.6831	4.24468	5.36743	5.46949	5.54636	5.57333	4.99507	5.64327
ENST00000447776	AC005008.2	0.0129575	0.234651	2.71501	down	2.97471	3.1785	2.6831	4.58441	4.69441	4.7181	5.44948	4.88361	4.8049	5.46386
ENST00000414223	AL353608.3	0.038112	0.311491	2.07723	down	6.33115	6.13848	6.34759	7.56679	7.56516	7.4651	8.89437	7.92858	7.31868	7.61576
ENST00000475886	LINC00698	0.00576684	0.202829	2.17616	down	5.55525	4.71823	4.36638	4.78659	5.87646	6.0798	6.53514	5.94274	6.29862	6.05553
ENST00000609401	LINC01278	0.0364204	0.306828	2.01461	down	2.97471	4.79981	2.6831	2.88098	3.65777	4.44063	4.41954	4.59469	3.98632	4.60769
T360820	G085208	0.00351782	0.184619	2.26636	down	2.97471	3.89491	2.6831	2.88098	3.91657	4.37167	4.53695	4.40517	4.10637	4.83199
NR_121608	AC097103.2	0.00603343	0.204584	2.21511	down	2.97471	3.87775	2.6831	2.88098	3.83124	5.03999	4.54733	4.0493	4.19112	4.15696
T087531	G020349	0.013586	0.238241	2.38154	down	4.28573	5.04462	3.91431	2.88098	4.90534	5.33212	5.51907	5.4131	5.30023	5.72594
ENST00000400282	MIR17HG	0.00376349	0.187696	2.1353	down	4.98402	4.83307	3.72505	4.42054	5.18399	5.61844	6.00812	5.71267	5.51907	5.76056
ENST00000604922	SH3D19	0.0222517	0.262702	2.19589	down	2.97471	2.50407	2.6831	4.09215	3.76677	3.79746	5.08664	4.63133	3.74233	4.43708
ENST00000616706	LINC00598	1.87296e-05	0.119885	2.13126	down	2.97471	2.50407	2.6831	2.88098	3.10571	3.76978	3.85132	3.87221	4.03784	4.07596
ENST00000424678	AL391336.1	0.00513975	0.197654	2.19884	down	2.97471	3.29298	2.6831	2.88098	4.35697	4.32522	4.47549	4.30604	4.39219	4.37353
T276407	G064228	0.0381805	0.311953	2.23384	down	7.16453	6.5595	7.60877	9.04683	7.965	8.30487	9.55426	8.9509	8.53887	8.79335
ENST00000443247	AC003001.1	0.00280118	0.168305	2.34421	down	2.97471	3.12162	2.6831	2.88098	3.90154	4.09457	4.75406	4.25696	3.77563	4.82626
ENST00000648274	AL592466.1	0.0130593	0.235077	2.26149	down	2.97471	4.88502	3.71608	4.57303	4.56693	5.13025	5.43877	5.00028	5.35104	5.68179
NR_104019	MLPH	0.0138174	0.238816	2.17552	down	6.24417	6.09975	4.84952	5.4985	6.88676	6.81304	7.24385	7.16946	6.83983	7.11932
ENST00000530778	RNF139-AS1	0.00323696	0.178414	2.11947	down	2.97471	3.93633	2.6831	2.88098	3.66178	4.40436	4.07559	4.08528	4.41228	4.57791
ENST00000490870	PSMA5	0.0436843	0.325209	2.87348	down	5.70541	5.63611	3.53294	2.88098	5.87784	6.00187	6.53534	6.33962	6.16185	6.20858
ENST00000637961	AC007491.1	0.0107391	0.228847	3.23118	down	2.97471	4.94082	2.6831	2.88098	4.88253	5.39869	5.3072	5.32687	5.21921	5.57048
ENST00000451940	NUTM2A-AS1	0.0135306	0.238241	2.16533	down	2.97471	4.13462	2.6831	2.88098	4.27043	4.14569	4.6856	4.36638	4.59188	4.72725
T284667	G066388	0.0101036	0.223727	2.20103	down	2.97471	3.22562	2.6831	2.88098	3.7322	4.03219	3.57323	3.74562	4.86467	4.9718
ENST00000453878	TMEM182	0.00272486	0.166845	2.09633	down	2.97471	3.41416	3.51666	2.88098	3.59385	4.37928	3.87888	3.88331	4.79418	4.78404
NR_027076	LINC00928	0.00181423	0.158809	2.32397	down	2.97471	3.82098	2.6831	3.90431	3.70455	4.48394	4.88863	4.73965	4.33384	4.72456
T210948	G048826	0.0406289	0.316471	2.98104	down	2.97471	5.46195	2.6831	2.88098	5.40238	5.26964	5.39544	5.46723	5.24966	5.90023
ENST00000530218	USP50	0.0219139	0.262702	2.31861	down	2.97471	3.21876	4.1703	2.88098	3.63416	5.31759	4.0662	4.59989	3.55832	5.4032
T368165	G087030	0.0122461	0.230593	2.21002	down	4.9218	5.16716	4.47589	5.76619	6.05326	6.06838	7.15682	6.33214	5.96842	6.57886
T324159	G075880	0.0118333	0.229292	2.97504	down	2.97471	4.73523	3.43043	2.88098	5.23434	5.30347	5.52774	5.46422	5.19112	5.6337
TCONS_00003849	XLOC_001655	0.0045721	0.195366	2.79972	down	2.97471	4.62511	4.68946	4.78969	4.8555	6.03437	6.29092	5.88556	5.52843	5.6216
ENST00000580420	AC009831.1	0.0457769	0.331353	2.78235	down	6.34228	6.19226	3.52195	3.95522	6.17338	6.5636	6.92156	7.00613	6.51547	6.55986
TCONS_00004306	XLOC_002158	0.00870689	0.214709	2.54845	down	2.97471	4.57739	3.60398	2.88098	4.68624	4.93163	5.33165	5.00394	4.97428	5.22991
ENST00000625996	AC012593.1	0.000279205	0.156914	2.51511	down	5.09108	5.33973	4.31233	5.05885	5.43094	6.22672	6.65956	6.21173	6.25937	6.52864
ENST00000545293	AC026333.3	0.0423515	0.321503	2.79841	down	10.9871	11.7024	10.673	10.5813	11.8343	11.9156	12.0492	14.5393	11.4617	13.2354
NR_026562	C20orf24	0.0166693	0.247147	2.00041	down	11.6139	10.9414	10.4874	11.7225	12.1389	12.266	12.9671	12.3592	12.2096	12.1036
ENST00000513406	ZBED3-AS1	0.0274292	0.279238	2.2386	down	6.50153	7.08343	5.08958	5.07326	6.66699	7.28899	7.27899	7.29314	6.87118	7.49546
ENST00000427579	AC007403.1	0.00290518	0.171239	2.67474	down	2.97471	3.79166	2.6831	2.88098	4.39167	4.6667	4.84797	4.52714	4.70089	5.07641
TCONS_00023269	XLOC_011336	0.00250351	0.163701	2.72491	down	2.97471	3.90482	2.6831	2.88098	3.98251	4.73324	4.48856	4.17883	4.95992	5.29662
ENST00000431181	MIR646HG	0.0342536	0.301978	2.22674	down	2.97471	3.87085	3.58092	5.0641	5.17123	4.85208	5.78845	5.30732	5.28141	5.20724
D16471	D16471	0.00529004	0.200091	2.18199	down	2.97471	4.13554	2.6831	2.88098	3.77395	4.30059	4.18028	4.35057	4.5253	4.71976
ENST00000642139	AL805961.2	0.0189362	0.254296	2.06921	down	2.97471	4.11512	2.6831	2.88098	4.05489	4.58815	4.34351	4.86714	3.75477	4.40063
ENST00000450365	Z68323.1	0.0156979	0.243303	2.91968	down	6.49414	6.24146	6.10634	8.22761	7.69623	8.00505	9.46691	8.4852	7.93536	8.60232
NR_123723	MMP25-AS1	0.0119675	0.229817	4.2618	down	2.97471	3.76277	4.37899	5.99909	5.59198	5.94738	7.6906	6.40796	6.11565	7.00326
ENST00000317114	DLGAP1-AS1	0.000501532	0.156914	3.5848	down	2.97471	3.7099	2.6831	2.88098	4.19997	4.7914	5.03428	5.49459	4.81319	5.52467
ENST00000590773	TTN-AS1	0.00210679	0.163507	2.38379	down	2.97471	3.84631	2.6831	2.88098	3.76406	4.15504	4.9172	4.60278	4.15677	4.58368
ENST00000598051	AC012313.7	0.0305879	0.291427	2.51888	down	7.47613	7.43612	5.4253	6.39231	8.04867	7.97085	8.78438	8.68305	7.73014	8.27403
NR_033994	TNFSF10	0.000233404	0.156914	2.25118	down	2.97471	3.54185	2.6831	2.88098	3.31318	4.38161	4.14467	4.12974	4.00561	4.58563
ENST00000601410	LINC01435	0.0278352	0.279673	2.32112	down	6.47871	6.0798	4.28993	5.49678	6.76387	6.85073	7.33727	6.77333	7.2839	6.93795
ENST00000563632	TBILA	0.0438137	0.325257	2.42456	down	2.97471	4.9536	3.59775	2.88098	5.48343	5.21322	5.23665	5.57251	5.18098	5.07574
FTMT27800001819	CATG00000054976.1	0.00559879	0.202357	2.12081	down	5.03905	4.54807	4.73014	5.4216	5.81798	6.01096	6.86302	6.17929	5.86552	6.06111
ENST00000643969	HAND2-AS1	0.0161602	0.245211	2.25349	down	6.24866	6.33279	4.83075	5.48527	6.61668	6.71359	7.86839	6.89408	6.8517	7.0472
ENST00000451690	AL390957.1	0.0123076	0.230917	2.32945	down	6.09227	5.79957	4.38536	4.76715	6.02508	6.49213	7.19236	6.41422	6.63362	6.43706
ENST00000587645	AC012309.2	0.0456065	0.330867	2.01328	down	2.97471	4.98706	3.84445	2.88098	4.44168	5.05771	4.95172	5.08537	4.52513	4.55667
ENST00000647929	AC018628.2	0.0225034	0.263312	3.2742	down	4.46773	5.09873	2.6831	2.88098	5.53299	5.73766	6.17016	6.20024	5.18148	5.92971
ENST00000510583	LINC02118	0.0130387	0.235077	2.4843	down	2.97471	3.74321	3.44728	5.13674	4.65101	5.09137	5.39281	5.54879	4.96423	5.51996
ENST00000577806	LINC00909	0.0434845	0.325103	2.32434	down	2.97471	4.09114	5.76965	4.76155	4.08584	5.40044	5.44283	5.25945	6.41146	5.25282
ENST00000593655	AC011447.3	0.0370496	0.308222	2.09853	down	6.20104	6.67368	6.59762	5.06836	6.07594	7.28097	7.97003	7.49007	7.17654	6.04592
TCONS_00026823	XLOC_012925	0.0459361	0.331751	2.3003	down	9.39839	10.2068	7.80562	8.7526	10.4177	10.3381	10.589	10.8488	9.95929	10.855
NR_038216	LINC01010	0.0233408	0.26658	2.70689	down	2.97471	5.19389	2.6831	2.88098	4.50013	5.14293	4.89412	5.01424	4.92954	5.43516
ENST00000625703	LINC01206	0.00825065	0.214602	2.00585	down	9.87848	11.3028	10.0279	10.2216	11.0188	11.5093	11.6339	11.3628	11.5893	11.3753
ENST00000412295	AC008443.2	0.0433396	0.324648	2.02723	down	6.99384	7.33179	7.73497	6.77525	7.45782	8.1768	9.16935	8.16749	8.93718	6.94042
ENST00000609144	AC019193.3	0.0110233	0.228847	2.24034	down	2.97471	4.88781	4.23798	4.4061	4.64154	5.15834	5.4051	5.14246	5.45325	5.80756
ENST00000435869	FAM180A	0.0342855	0.301978	2.0362	down	2.97471	4.53401	2.6831	2.88098	3.75219	4.81432	4.17017	3.75575	4.88033	4.33384
ENST00000585323	NEDD4L	0.0348194	0.304018	2.37723	down	2.97471	3.07365	4.96236	2.88098	4.46373	5.21702	5.6301	4.86031	4.59035	4.30408
ENST00000596537	MIR663AHG	0.0341875	0.301978	2.24413	down	2.97471	4.70978	2.6831	2.88098	4.58353	4.84952	4.53106	4.48589	4.70902	5.08741
ENST00000582543	BX547991.1	0.0108975	0.228847	2.48991	down	7.85422	7.90855	6.4489	7.34529	8.66246	8.8226	9.38843	9.14352	8.43287	9.01246
ENST00000648110	AC007179.1	0.011931	0.229817	2.0381	down	2.97471	3.94127	2.6831	2.88098	3.57543	3.95059	4.86496	4.37899	3.61493	4.38216
ENST00000430641	PPEF1-AS1	0.00184951	0.158809	3.71972	down	4.57812	6.12088	5.11847	4.62767	6.14001	7.28155	7.81063	7.48223	7.05549	6.43122
ENST00000564585	LINC02280	0.0221993	0.262702	3.46033	down	6.60786	6.53706	3.75346	4.86836	7.04341	7.37427	7.92386	7.64054	7.48463	7.34138
ENST00000380601	AC121338.1	0.0407815	0.316471	2.31133	down	9.18088	9.85316	7.44958	8.15223	9.89618	9.91775	10.1517	10.3441	9.7775	10.3846
ENST00000441268	LINC00323	0.00675701	0.207082	2.13149	down	2.97471	3.66575	2.6831	2.88098	3.78339	3.98498	5.01511	4.13515	3.8721	4.43991
ENST00000527092	AP002748.3	0.00912466	0.21684	2.16278	down	6.41572	8.17101	7.69358	7.48064	8.01093	8.65701	8.67822	8.82782	8.87999	8.29327
ENST00000416220	MKLN1-AS	0.0336864	0.300276	2.07318	down	9.21633	10.8047	9.40205	8.94472	10.6958	10.5606	11.1384	11.1229	10.9461	10.5548
ENST00000504495	RIMKLB	0.0234016	0.26658	2.06508	down	2.97471	4.06041	2.6831	3.97827	4.67502	4.62672	4.7693	4.57038	4.68394	4.95217
ENST00000416473	AL137847.1	0.00140086	0.156914	2.16055	down	2.97471	2.50407	2.6831	2.88098	3.28711	4.02134	4.1547	3.88826	3.32827	4.49441
ENST00000511592	AC027315.1	0.00765768	0.211996	2.30482	down	2.97471	4.07433	3.69187	2.88098	3.61156	4.46141	4.60338	4.06629	5.60004	4.52561
ENST00000552957	LINC01551	0.0341534	0.301978	2.05888	down	2.97471	4.451	2.6831	2.88098	4.52282	4.39277	4.52728	4.73663	4.52612	4.5391
HBMT00001464179	CATG00000105497.1	0.00131764	0.156914	2.12671	down	2.97471	3.85505	3.57227	4.03014	3.42541	4.40142	5.12578	4.41805	4.74115	4.6143
uc002pzf.1	ZNF528-AS1	0.0151403	0.243303	2.17719	down	2.97471	3.46801	2.6831	4.11865	4.53573	4.63995	5.12493	4.46959	4.509	4.64909
ENST00000555103	AL132709.1	0.0226688	0.263567	2.014	down	9.7863	9.85482	8.64202	9.49087	10.3531	10.2216	10.7301	11.3146	10.0843	10.8268
ENST00000619640	C2orf48	0.0395583	0.314806	2.13535	down	2.97471	4.65101	3.59588	2.88098	4.95714	4.56312	4.98497	4.63684	5.14073	5.20641
ENST00000565283	AC009414.2	0.0353473	0.304842	2.05554	down	2.97471	4.50374	5.14575	5.10259	4.9738	5.41999	5.68871	5.63127	5.48492	5.67328
ENST00000509993	MGC32805	0.00182392	0.158809	2.88323	down	2.97471	3.86177	2.6831	2.88098	4.28319	4.58642	4.88418	5.04185	4.60132	5.20843
NR_046203	LINC01189	0.0141399	0.240597	2.49149	down	5.9014	6.70475	5.52433	6.42672	7.77652	8.01203	7.67027	7.16993	7.97654	8.08999
T356676	G084147	0.000826667	0.156914	2.19364	down	6.89523	6.85668	6.07128	6.3339	7.12386	7.53901	8.13581	7.77514	7.70795	7.78969
ENST00000602892	MIR99AHG	0.00718772	0.208046	2.24732	down	9.67091	10.4009	9.08602	9.38843	10.5813	10.754	11.2051	11.3482	10.5269	11.1343
ENST00000475953	LRRC75A-AS1	0.0130255	0.235077	2.00151	down	2.97471	3.58543	2.6831	2.88098	2.85599	4.04556	4.64283	4.14601	4.17079	2.98045
T275812	G064111	0.0153035	0.243303	2.48393	down	9.17867	9.36833	7.36809	8.71798	9.70759	9.84901	10.4699	10.3956	9.90354	10.2858
