# Supplementary material for: Differential lncRNA/mRNA expression profiling and ceRNA network analyses in amniotic fluid from foetuses with ventricular septal defects
Source: PeerJ. 2023 Feb 27;11:e14962. doi: 10.7717/peerj.14962 (PMC9979828; doi:10.7717/peerj.14962)
Supplement: Supplemental Information 4 [file peerj-11-14962-s004.xlsx]

## Sheet: Sheet1
Transcript_ID	GeneSymbol	P-value	FDR	Fold Change	Regulation	T1	T2	T3	T4	T5	N1	N2	N3	N4	N5
ENST00000464845	NAA10	0.00227046	0.16047	2.26189	up	5.05431	5.09253	5.896	5.63926	4.91762	3.82748	3.57959	4.36244	4.5944	4.34816
ENST00000240488	MND1	0.0115183	0.232588	2.22815	up	8.52445	7.97059	7.31702	7.16196	6.83349	7.02385	5.90484	6.42399	6.45359	6.222
ENST00000358344	HNRNPAB	0.0182731	0.262842	2.17984	up	4.77501	4.92141	6.5246	5.81996	5.18098	4.40982	4.67616	4.80053	3.83685	3.87748
ENST00000394166	NR2F2	0.00145982	0.147182	2.01745	up	6.87792	7.51644	6.94823	6.49317	6.41917	5.96647	5.62403	6.09465	5.784	5.7231
ENST00000408947	TAS2R40	0.014406	0.248611	2.51235	up	5.07767	3.98645	6.01709	5.98951	4.34282	3.64582	3.58524	3.73773	3.65419	4.14539
ENCT00000474040	CATG00000112929.1	0.00452373	0.18049	2.24455	up	5.37707	6.346	6.58247	5.72414	5.6187	4.87559	4.02908	5.11687	5.01898	4.77576
ENST00000549396	PPFIA2	0.000650732	0.133386	2.55005	up	5.91742	5.66582	5.94283	5.76701	5.55839	4.41775	3.65838	5.14049	4.59357	4.28865
ENST00000644544	AC093668.3	0.000729329	0.133386	2.55066	up	5.44283	5.34063	5.78215	5.86792	4.76744	3.91136	3.66023	4.62677	4.00094	4.24731
ENST00000397659	TCTN1	0.0185174	0.264153	2.13319	up	6.89927	6.85595	8.14704	7.78784	6.27345	6.01277	5.62003	6.05507	6.3167	6.49393
ENST00000369893	SFXN2	0.00684344	0.206294	3.04331	up	5.67057	6.97903	5.89687	5.64273	5.07261	4.43745	3.58687	5.3227	4.24169	3.6449
ENST00000618539	FDFT1	0.00492075	0.184062	2.16367	up	8.39268	8.18943	9.38348	8.23154	7.89204	7.39086	6.92499	7.68115	7.46854	7.05623
ENST00000376771	TBC1D25	0.00127131	0.143374	2.13828	up	5.08444	4.25215	4.17762	4.58079	4.20065	3.46133	3.85919	3.32554	3.16731	3.00003
ENST00000397985	SERPINB8	0.00274857	0.164715	2.23152	up	5.46559	6.13625	6.4269	5.70788	5.29747	4.53322	4.0936	5.12016	4.61966	4.8773
ENST00000371957	STKLD1	0.0137236	0.245557	2.01805	up	6.63235	7.45824	6.35454	6.01294	6.13665	5.46511	4.79955	5.96246	5.66685	5.63596
ENST00000278550	TENM4	0.000806371	0.133386	2.29932	up	5.06793	5.18653	5.2753	5.23479	4.29507	3.8349	3.26615	3.93798	3.96553	4.04903
ENST00000408989	UMODL1	0.00289426	0.166677	2.0248	up	4.80375	5.91413	5.75409	5.21078	5.16402	4.57046	3.98236	4.60769	4.10776	4.48962
ENST00000331581	CADM1	0.0481095	0.357408	2.35261	up	8.58768	9.28159	7.54708	6.69584	7.46749	6.89849	5.83397	7.49662	6.68998	6.4893
ENST00000538431	CIZ1	0.00343945	0.173361	2.06228	up	6.97169	7.68584	7.80973	7.32013	6.93373	6.22931	5.81854	6.94318	6.28354	6.22535
ENCT00000212052	CATG00000040370.1	0.010667	0.232555	2.25086	up	5.77375	6.46593	7.24567	6.66274	5.63233	5.28404	4.4558	5.59958	5.30522	5.28339
ENST00000425629	SIGLEC6	0.0087929	0.219651	2.44685	up	6.15833	5.54879	7.47471	6.7879	5.78131	5.06505	4.55728	5.3244	5.12588	5.22378
ENST00000427500	GBA	0.0106178	0.23253	2.58624	up	4.70958	4.4095	6.60237	5.67837	4.6714	3.83557	3.62968	3.97014	3.97574	3.80582
ENST00000226382	PHOX2B	0.0158237	0.254176	2.81332	up	6.25461	4.27639	6.03047	5.50011	3.93424	3.2938	3.8236	3.42941	3.90727	4.08036
ENST00000252992	CEP85	0.00551991	0.193717	2.19795	up	5.8701	5.65707	6.55283	6.06439	5.16573	4.74139	4.00705	4.83633	5.2136	4.83099
ENST00000316073	RPTN	0.0151352	0.250072	7.08784	up	2.97471	7.62541	7.38459	7.35316	6.80169	4.47473	2.77068	3.62291	3.33383	3.81066
ENST00000370768	FUBP1	0.00405475	0.178294	2.09974	up	7.41865	7.52663	8.5423	8.19241	7.24008	6.80243	6.37167	6.61073	6.9582	6.82597
ENST00000367175	LRRN2	0.000228709	0.117633	2.41971	up	7.18452	7.64469	8.15272	7.58122	7.39906	6.41685	5.98153	6.64147	6.09708	6.45108
ENST00000230122	ZBTB24	0.000803392	0.133386	4.24907	up	4.82798	4.6553	6.45484	5.98899	4.61136	2.85567	3.16255	3.15117	3.37954	3.55381
ENST00000308177	PCDHGC3	0.00226725	0.16047	2.42424	up	6.22879	6.75548	7.65822	7.38894	6.4917	5.53145	5.29645	5.90406	5.59493	5.80857
ENST00000337929	IL21R	0.0115961	0.232656	2.80756	up	6.467	6.56558	8.75989	8.05888	7.20961	5.59198	5.75778	5.92999	6.31295	6.02167
ENCT00000407904	CATG00000094915.1	0.0174093	0.259951	2.20278	up	5.85811	6.66945	4.70132	4.94501	5.10607	4.21117	4.2101	4.82102	4.13442	4.20661
ENST00000326270	TLK2	0.0371183	0.327741	2.35755	up	5.89553	5.55983	7.77541	7.58423	6.0099	5.0697	5.12248	4.96079	5.90453	5.58098
ENST00000376423	GRIPAP1	0.00282731	0.164715	2.88393	up	5.57241	4.91836	5.43516	5.60248	3.88594	3.18915	3.62766	4.03071	3.70687	3.21978
ENCT00000379828	CATG00000086695.1	0.0226847	0.277736	2.02516	up	5.48414	5.17372	6.18332	6.17883	4.76026	4.6204	4.80571	5.20189	4.12463	3.93748
ENST00000278765	GGTLC1	0.00283117	0.164715	2.3175	up	6.71204	7.79789	7.08646	6.38684	6.74289	6.04848	5.34577	6.04356	5.38305	5.84243
ENST00000399120	HLCS	0.0248944	0.288624	2.12784	up	4.96423	4.77104	6.54248	6.00412	4.72691	4.41383	3.76315	4.60638	4.45962	4.31886
ENST00000420959	CORO1C	0.0497979	0.360784	2.26299	up	4.16668	3.82268	5.55463	6.11806	3.77976	3.54965	2.90326	3.45387	3.80718	3.83667
FTMT26400003890	CATG00000027634.1	0.00609313	0.200725	2.82117	up	6.69311	7.57863	6.59775	6.2041	6.19389	5.224	4.15578	6.14204	5.25227	5.01192
ENST00000572888	DPEP2	0.00238181	0.162909	2.4991	up	5.09244	5.48527	6.25851	5.87784	4.96138	3.97122	3.62957	4.54322	4.34271	4.58169
ENST00000355739	ERCC5	0.00862592	0.219651	2.28203	up	5.80204	7.00148	6.24518	5.50183	5.49752	4.79824	4.11444	5.31458	4.90526	4.96393
ENST00000347708	HGH1	0.0245298	0.28795	2.33937	up	4.82128	4.14828	6.01213	5.87517	4.22904	3.55017	3.20527	3.73973	4.17396	4.28618
ENST00000268184	CRTC3	0.018395	0.263616	2.07857	up	6.35712	6.7879	7.91386	7.06502	6.34636	5.7569	5.05989	6.06778	6.2674	6.04031
ENST00000376104	DLG2	0.00188831	0.159642	2.16061	up	7.20497	6.49229	7.09082	6.97311	6.14507	6.11187	5.33996	5.64129	5.83703	5.41891
ENST00000318962	ALS2CL	8.48613e-05	0.115232	2.05049	up	8.82713	9.18706	9.19087	8.83006	8.87784	8.20701	7.57567	8.16791	7.88916	7.89336
ENST00000223208	CEP41	0.039353	0.334011	2.01787	up	7.37846	6.77873	8.53973	8.60805	6.9114	6.45339	6.51939	6.37167	7.05226	6.75548
ENST00000263980	SLC9A1	0.0171182	0.259038	2.16697	up	7.97324	7.8524	7.46577	6.81943	6.47679	6.47305	5.29819	6.38485	6.26567	6.58747
ENST00000329474	CARMIL1	0.00651823	0.204516	2.03637	up	10.2475	9.9977	11.0581	11.1837	10.027	9.60744	9.1185	9.30823	9.75095	9.59887
ENST00000229903	SAYSD1	0.00293978	0.167438	2.10916	up	7.58423	7.05958	7.86978	7.17551	6.56217	6.41766	5.98437	6.01027	6.51669	5.93893
ENST00000324447	SAGE1	0.0170783	0.25897	2.94253	up	5.91193	6.50399	7.96813	5.40972	6.31077	4.47228	4.66301	5.98781	4.37916	4.81698
ENST00000394836	RAB3IL1	0.00277469	0.164715	2.21843	up	6.09839	6.49244	7.36381	6.74171	5.91355	5.37925	5.14293	5.32708	5.33241	5.68053
ENST00000258083	PRADC1	0.015117	0.250072	2.15673	up	6.52408	5.04264	4.78263	4.90614	4.66066	3.77097	4.30102	4.16219	4.30662	3.8311
ENST00000258888	ALPK3	0.00210053	0.159642	2.05767	up	5.15318	5.01502	5.59958	4.39277	4.68778	3.8118	3.9571	4.12097	4.18177	3.57165
ENST00000405312	PSG4	0.0159999	0.254406	2.08308	up	5.12666	5.36854	6.60594	6.05695	5.67044	4.77165	3.93122	4.98438	4.55061	5.29707
ENST00000644742	ZNF385B	0.00252571	0.163529	2.13577	up	9.0072	9.23006	9.86822	10.027	8.90093	8.34193	7.91362	8.44441	8.55536	8.30437
ENST00000264832	ICAM1	0.0296515	0.298576	2.05472	up	5.17804	5.29068	5.92157	6.0523	4.57843	4.19848	4.79388	5.25089	3.84831	3.73475
ENST00000235933	CD160	0.00884187	0.219651	2.09504	up	2.97471	3.47201	4.38123	4.45962	3.2473	2.60662	2.41549	2.59809	2.74737	2.83241
ENST00000644917	SPTB	0.0173368	0.259951	2.50564	up	4.57024	4.7314	6.71472	5.51263	5.06266	4.22864	3.38887	4.66908	3.68617	3.99299
ENST00000329117	BCAN	0.00789329	0.217611	2.07652	up	5.4277	4.93524	5.06729	4.56914	4.17115	3.74661	2.98344	4.03867	4.11912	4.01184
ENST00000327042	TMEM86B	0.00820615	0.218617	2.00047	up	7.96803	7.77514	8.17656	7.65048	7.09837	7.14214	6.45143	6.26546	7.3818	6.42606
ENST00000407364	METTL15	0.0119862	0.234904	2.4118	up	7.21803	7.80697	8.36261	7.7382	6.50596	6.38787	5.34145	6.64168	6.30692	6.6033
ENCT00000003570	CATG00000087839.1	0.028797	0.295654	2.24614	up	7.23609	8.10877	6.96915	5.80574	6.30458	5.77334	5.11721	6.27398	5.86792	5.55463
ENST00000495303	MYD88	0.00782271	0.217396	2.1497	up	5.64291	5.14535	4.29184	4.25422	4.22084	3.81404	3.40553	3.94953	3.53832	3.32705
ENST00000251993	KIAA0930	0.01138	0.232588	3.19096	up	10.2046	9.16695	11.052	11.7177	9.75538	8.79554	7.87739	8.67234	9.33629	8.84508
ENST00000356838	TMEM71	0.0222835	0.277189	2.46041	up	4.91377	4.31968	6.31415	6.21173	4.36463	3.86843	3.61984	3.62525	4.24654	4.26941
ENCT00000175321	CATG00000031471.1	0.00193023	0.159642	3.04233	up	7.38613	7.73238	8.73845	7.8007	6.82052	6.24272	5.50828	6.51081	6.17713	6.01336
ENST00000448921	SERPINA1	0.00885339	0.219651	2.0999	up	5.16402	4.95714	6.03762	5.49958	4.8834	3.75975	3.72777	4.24987	4.9255	4.52728
ENST00000336577	MMP25	0.00257325	0.163981	2.01606	up	5.22525	5.54433	5.35483	4.43906	4.69943	4.32388	4.0014	4.25386	3.76009	3.86598
ENST00000313375	MLXIPL	0.0182807	0.262842	2.53026	up	8.5107	8.07814	9.9279	9.90439	7.89822	7.76816	7.21585	7.35619	7.70503	7.57769
MICT00000113729	CATG00000024469.1	0.0484443	0.358517	2.05085	up	6.54982	6.88347	8.37023	8.25888	6.43505	6.22088	5.84948	6.07299	6.5636	6.60939
MICT00000354055	CATG00000101343.1	0.00736023	0.2141	2.00534	up	6.07694	5.51024	5.80166	5.60022	4.9491	4.59106	5.21062	4.69788	4.52741	3.89197
ENST00000518075	XAGE1B	0.028932	0.295654	2.16389	up	8.96041	9.50556	8.11204	7.75085	8.17539	7.46577	6.76956	8.34257	7.38613	6.97207
ENST00000374264	SUSD1	0.000156335	0.115232	2.96879	up	5.82819	5.44868	6.33334	5.94706	5.12704	4.08205	3.81404	4.14173	4.43465	4.36244
ENST00000379540	NFX1	0.0414533	0.340204	2.04254	up	8.64956	8.06019	9.42782	8.80023	7.41674	7.23632	7.00731	7.22594	8.42912	7.30404
ENST00000284154	GRAP	0.0286777	0.295654	2.13187	up	5.1041	5.82171	6.3618	5.39788	5.7888	5.0766	4.06473	5.6329	3.66401	4.57546
ENST00000421745	BIRC6	0.0453223	0.349562	2.1395	up	6.32424	5.36512	4.93943	4.26055	3.87199	4.35065	4.16114	3.46968	3.74153	3.55197
MICT00000062561	CATG00000005989.1	0.0300435	0.300107	2.6335	up	8.12813	9.05086	7.33671	6.67607	6.96309	6.38144	5.52525	7.34167	6.06687	5.85474
ENST00000403581	PRR5	0.00419267	0.178576	2.95769	up	5.86572	5.82064	7.3501	6.75943	5.39811	4.48777	4.08134	5.00845	4.92586	4.86822
ENST00000602157	hsa-mir-150	0.0026065	0.164083	2.51334	up	4.68068	4.48519	5.78948	5.78912	4.49478	3.62714	3.85518	3.76082	3.77492	3.57317
ENST00000245957	CFAP61	0.0120824	0.234904	2.11523	up	9.48011	9.4443	10.6497	10.627	9.18391	8.96536	8.35658	8.82975	8.8612	8.96799
ENST00000439576	ACAN	0.0159079	0.254406	2.04679	up	6.01875	4.92992	5.63656	6.02149	4.50247	4.59585	4.28875	3.85305	4.50013	4.70459
ENST00000409085	AAK1	0.032505	0.309474	2.20233	up	4.31721	4.43734	6.23087	5.98444	4.40878	3.84033	3.60051	3.80712	4.1602	4.27533
ENST00000318225	C3orf22	0.00200181	0.159642	2.48836	up	9.6778	10.1383	9.69796	9.18581	8.88231	8.52708	7.64122	8.71897	8.16698	7.95198
ENST00000374521	AWAT1	0.00632149	0.204082	2.04063	up	9.89199	8.99725	9.82216	10.4382	9.57203	8.96041	8.20776	9.05191	8.82415	8.53234
ENST00000295082	KCNF1	0.0331109	0.311337	2.09425	up	5.63645	5.53015	7.15643	7.01893	5.3854	5.07863	4.83373	4.67045	5.38034	5.43203
ENST00000389362	PRB2	0.0015723	0.153759	2.14583	up	6.68168	7.00171	7.56817	6.71905	6.61317	6.0658	5.35576	6.18012	5.55216	5.92226
ENST00000318522	EML4	0.020073	0.272114	2.02307	up	5.75273	6.82021	5.42463	5.04027	5.29758	4.89925	4.08857	4.94294	4.85959	4.46232
ENST00000248150	GNG13	0.0390181	0.333296	2.03352	up	8.07525	7.49796	8.08804	7.8739	7.27227	6.42709	5.983	8.21224	6.54876	6.51645
ENST00000240423	NCAPH	0.00981463	0.22541	2.03051	up	7.30001	7.17533	8.01497	8.38217	7.09237	6.73447	5.98921	6.50596	6.95903	6.66699
ENST00000264376	CRYGD	0.0164366	0.257077	2.69798	up	7.46728	7.28071	8.85588	9.40027	7.40581	6.59239	6.03629	6.65259	7.16304	6.80627
ENST00000427025	NHSL1	0.0139859	0.247097	2.76919	up	6.99966	6.33924	8.33636	8.18383	6.29503	6.24127	5.33928	5.47407	6.00342	5.74875
ENST00000337322	BAG5	0.00436858	0.179227	2.04339	up	4.27582	3.60193	4.20661	4.71876	3.7634	2.64837	2.79338	3.61712	3.26743	3.08541
ENST00000225296	DHX33	0.00115731	0.143374	2.65438	up	6.90663	6.2882	6.17223	5.98205	5.70405	4.74569	4.35026	5.57119	4.63777	4.70637
ENST00000406818	DTNB	0.0120659	0.234904	2.07535	up	6.96348	7.86102	6.85217	6.47287	6.06709	5.83646	5.30114	6.06597	5.81593	5.93038
ENCT00000278462	CATG00000057656.1	0.0342314	0.314949	2.21784	up	5.6555	5.16171	6.08715	5.73223	3.69856	3.71831	4.43372	4.55528	4.08365	3.79842
ENST00000329003	GALR2	0.00925548	0.221831	2.01474	up	4.54388	4.95267	5.90045	5.73122	4.79665	4.31582	3.73509	4.50076	4.07926	4.24098
ENST00000537494	SMIM5	0.00110274	0.143374	2.07346	up	4.91557	4.9774	4.99763	4.96528	4.15627	4.28255	3.58833	3.69095	3.518	3.67213
ENST00000376112	ID1	0.0265552	0.292063	2.81813	up	5.05445	5.00891	7.14451	7.18432	5.4061	4.57217	3.62383	4.31489	4.84457	4.96914
ENST00000611257	TBC1D3B	0.024814	0.288581	2.64425	up	6.09975	5.51497	7.67102	6.72177	6.51513	5.84594	4.44982	5.83397	4.06704	5.31157
ENST00000381089	VCX3A	0.00603474	0.199999	3.44586	up	6.42766	6.88736	8.38701	6.74395	6.87183	4.79875	5.51166	6.4997	4.59652	4.98688
ENST00000374005	FGR	0.00206844	0.159642	2.15527	up	5.78607	4.94097	5.89954	5.60659	4.85466	3.97813	4.67535	4.17141	4.431	4.29261
ENST00000500254	PRB1	0.000678306	0.133386	2.17418	up	8.88231	9.60445	9.50556	8.92096	9.19523	8.27585	7.78471	8.59014	7.85385	8.00162
ENST00000382580	CHEK2	0.0285466	0.295654	2.36714	up	5.40752	5.80098	7.76081	7.17024	5.9131	5.08062	4.92876	4.99265	5.18973	5.64518
ENST00000324866	LRTOMT	0.00806727	0.218324	2.27809	up	4.82142	4.83698	4.80421	5.20878	3.58576	2.89764	3.2327	3.94355	3.86194	3.3822
ENST00000293845	CCDC42	0.048083	0.357408	2.40852	up	6.23369	6.97762	7.28763	6.91243	7.30671	5.55194	4.30045	7.2739	5.03517	6.21588
ENST00000264187	NID1	0.0019601	0.159642	2.22354	up	12.312	11.5459	12.5222	12.8412	12.4475	11.4352	10.6958	11.3538	11.3593	11.0603
ENST00000372923	DNM1	0.00402312	0.178294	2.31249	up	4.80592	5.77025	5.983	5.03381	5.17545	4.13953	3.56668	4.80562	3.92759	4.28177
ENST00000220509	VPS18	0.0058736	0.198378	2.09443	up	4.64576	5.40194	4.80139	4.17992	4.09234	3.2334	3.12292	3.66082	3.94589	3.82553
uc001htg.2	AX748369	0.0109728	0.232588	4.18748	down	2.97471	3.79984	4.33113	6.12964	5.42858	5.97294	7.39774	6.56443	6.04256	7.01662
ENST00000262259	ZNF175	0.00174951	0.159642	2.15199	down	2.97471	3.71689	3.45575	2.88098	4.09976	4.33393	4.42361	4.49014	4.67385	4.73492
ENST00000644371	ABHD5	0.0110059	0.232588	2.18011	down	2.97471	3.96699	2.6831	2.88098	4.13504	3.81944	4.69426	4.45632	4.65263	4.6402
ENST00000259989	FGFBP2	0.031333	0.30589	2.05615	down	10.5996	11.1852	9.6645	9.94276	11.5976	11.332	11.7651	11.8883	11.1746	12.0295
ENST00000641076	OR5M1	0.00680138	0.206294	2.07665	down	8.26554	8.09065	7.56384	8.59465	9.08106	9.06342	9.51636	9.6984	8.99318	9.59564
ENST00000340855	IDS	0.0393574	0.334011	2.80128	down	8.19437	8.33338	5.9928	6.49284	9.12352	8.81379	9.30437	9.4288	8.87218	9.14823
ENST00000565886	TGFBR3L	0.00758112	0.215255	2.11861	down	4.67463	5.58464	4.79571	5.62381	6.03066	6.12955	6.71051	6.7419	5.95855	6.58454
ENST00000342232	JPH1	0.0204758	0.273829	2.43028	down	2.97471	4.43917	2.6831	2.88098	4.54443	4.95217	4.8646	4.90793	4.08272	5.12059
ENST00000341255	RTL6	0.0176453	0.259951	2.16117	down	4.70736	3.74386	5.2898	5.61198	5.08219	5.78576	6.70509	5.9263	5.5834	5.99371
ENST00000371222	JUN	0.0126169	0.239798	5.78271	down	4.23439	3.96049	6.21939	2.88098	5.75831	7.08035	8.60026	7.64952	6.84808	5.53408
ENST00000536459	ZNF324	0.0151822	0.250072	2.46363	down	9.13877	9.5411	8.03355	8.82571	10.4402	10.25	10.7907	10.7192	10.0603	10.6631
ENST00000377103	THBD	0.0245894	0.28795	2.2563	down	2.97471	3.56467	4.33341	5.06675	4.78715	5.11912	5.62944	5.4366	4.74045	5.6709
ENST00000478497	ST20	0.0286399	0.295654	2.04339	down	11.1343	12.0462	10.4775	10.7963	12.3254	12.1879	12.7097	12.6423	11.9104	12.4843
ENST00000369519	RBM20	0.0351765	0.31909	2.2102	down	2.97471	4.19449	2.6831	2.88098	4.86517	4.18177	4.94439	4.53498	4.70059	4.95761
FTMT28800001481	CATG00000057936.1	0.0321015	0.308577	2.15515	down	2.97471	4.69972	4.98966	4.9491	5.17194	5.27932	5.58464	5.48431	5.89114	6.08468
ENST00000299045	TCP11L2	0.0360829	0.323187	2.0416	down	2.97471	3.57363	4.13863	2.88098	4.94391	4.6288	5.07427	4.66027	4.29292	5.0041
ENST00000378616	XK	0.0112212	0.232588	2.34366	down	2.97471	3.83203	3.95352	4.39865	5.02537	4.9397	5.47048	5.41204	4.83152	5.67438
ENST00000519846	CLVS1	0.0357759	0.321921	2.04931	down	2.97471	4.69983	3.38799	2.88098	4.31556	4.8834	4.03259	4.49949	4.98053	5.03875
ENST00000565323	BLOC1S6	0.00326793	0.171714	2.10187	down	2.97471	2.50407	2.6831	2.88098	3.88992	3.97279	4.26524	4.20685	3.72155	4.12472
HBMT00001081968	CATG00000072318.1	0.00118097	0.143374	2.46551	down	5.60022	5.19231	4.39206	5.10384	5.40414	5.82786	6.64124	6.74482	6.33924	6.64886
ENST00000369787	KCNC4	0.0238866	0.28519	2.66148	down	4.90975	3.82529	2.6831	2.88098	4.95785	4.83088	5.76965	5.12258	5.15572	5.43928
ENST00000275358	VWDE	0.039504	0.334011	2.02636	down	2.97471	4.9932	4.65797	4.43764	5.16132	5.24766	5.79286	5.16286	5.83662	5.27932
MICT00000233834	CATG00000058631.1	0.0468548	0.354006	2.21928	down	7.79069	7.01773	8.05252	9.35339	8.99753	8.94107	10.3135	9.47273	8.96623	9.26876
ENST00000252804	PXDN	0.00306767	0.169473	4.40506	down	2.97471	3.40998	4.1364	2.88098	3.70322	5.39618	7.03227	5.58824	5.6207	4.16372
ENST00000428879	MMADHC	0.00259902	0.164083	2.34925	down	2.97471	3.6813	3.79224	3.93705	4.50714	4.94855	5.08172	4.72348	4.76462	5.53508
ENST00000397292	PLAA	7.56994e-05	0.115232	2.0413	down	2.97471	2.90596	2.6831	2.88098	3.32499	4.05262	3.67731	3.88537	4.11184	4.19005
ENST00000375661	LSM2	0.0290289	0.295654	2.22384	down	2.97471	4.24599	2.6831	4.39802	4.91207	4.85897	5.17171	4.97056	4.92128	5.05664
ENST00000293778	CXCL16	0.00740183	0.214496	2.14867	down	5.8113	5.88257	5.43291	5.4032	6.84903	6.78224	7.32279	7.17417	6.4228	7.19424
ENST00000375222	C20orf144	0.0146815	0.248725	2.33873	down	7.46966	7.79113	6.41196	6.67117	8.39295	8.56358	9.02711	8.71055	8.06259	8.50167
ENST00000264220	PPAT	0.00635018	0.204082	2.28396	down	2.97471	3.55928	2.6831	4.01248	3.55518	3.92769	5.25227	4.80354	4.36702	4.3919
ENST00000620995	TYW1B	0.00319331	0.17061	2.47539	down	2.97471	3.82956	2.6831	2.88098	4.16457	4.32373	4.80096	4.98017	4.43239	4.53394
ENST00000321196	TMTC2	0.00160723	0.156192	2.63909	down	2.97471	2.50407	2.6831	2.88098	2.40763	3.99142	5.01455	4.36982	3.45387	3.62104
ENST00000379661	KATNB1	0.0316009	0.306218	2.12314	down	10.6382	11.2979	9.53607	10.1653	11.7568	11.5893	11.9828	11.9699	11.3082	11.9751
ENST00000592782	NMT1	0.047399	0.356023	2.18887	down	4.7708	4.96925	2.6831	4.94467	5.29948	5.56215	5.83544	5.91683	5.29887	5.70495
ENST00000540593	ZNF410	0.0488334	0.359182	2.00128	down	2.97471	4.39294	2.6831	2.88098	4.65363	4.84303	4.20852	4.31257	4.65912	4.56676
ENST00000537866	RSPRY1	0.00655046	0.204894	2.17459	down	2.97471	4.32373	3.73395	2.88098	4.13882	4.53831	4.93738	4.51952	4.76657	4.89412
ENST00000422602	RIPOR1	0.0400047	0.335394	2.22865	down	4.24392	4.9255	2.6831	2.88098	4.67872	4.841	5.15602	4.79597	5.20012	5.19996
ENST00000646438	OOSP3	0.00590708	0.198378	2.99538	down	2.97471	3.88168	2.6831	2.88098	4.95854	5.20068	5.08588	4.99074	4.98081	5.03459
ENST00000377113	CASC10	0.00207225	0.159642	2.93005	down	2.97471	2.50407	2.6831	2.88098	2.67195	4.66158	5.18936	4.42138	4.01368	3.18345
ENST00000391354	KRTAP9-7	0.0101496	0.227724	2.65104	down	6.94729	7.15718	5.56965	6.11868	7.94111	7.97501	8.36985	8.23814	8.20776	7.97594
ENST00000338981	USP9Y	0.02366	0.283836	2.61099	down	4.60507	6.14688	4.40574	5.6486	6.7992	6.75442	7.37204	7.23139	6.22523	6.94539
ENST00000286049	XAGE2	0.0263343	0.292063	5.34051	down	6.01373	6.65409	8.06544	4.42657	6.46094	9.12352	10.0537	9.24541	9.12777	6.15525
ENST00000261772	AARS	0.0285859	0.295654	2.69342	down	5.00453	5.17346	3.39211	2.88098	5.48245	5.80413	6.27621	5.68716	5.56413	5.7491
ENST00000332499	HEXIM1	0.0486379	0.358592	2.62618	down	4.96047	4.28319	5.53688	2.88098	4.8192	5.90916	6.75521	6.77912	5.0711	4.93095
ENST00000508784	ZNF827	0.0081696	0.218617	2.57703	down	2.97471	2.50407	4.01087	2.88098	3.28294	4.78633	5.24797	4.79955	4.08538	3.56289
ENST00000394181	CLDND1	0.0407181	0.337697	2.72739	down	6.60874	6.68465	3.86158	5.94855	7.08865	7.39112	7.9581	7.52089	7.01325	7.5464
ENST00000416044	KRTAP25-1	0.0184296	0.263626	2.11573	down	2.97471	3.20393	2.6831	2.88098	4.43715	4.32709	3.73225	4.10987	4.54733	4.86912
ENST00000372470	MPL	0.0384381	0.331978	2.07817	down	8.71296	9.10673	7.13424	7.80304	9.28687	9.30135	9.60901	9.73261	9.07	9.60744
ENST00000307637	C3AR1	0.0194491	0.269404	2.32999	down	2.97471	4.66556	2.6831	2.88098	4.3033	4.63595	4.61216	4.92719	4.47823	4.95575
ENST00000332772	SIMC1	0.0308794	0.304659	2.07501	down	2.97471	4.51662	2.6831	3.95981	4.62343	4.98081	4.60068	4.71113	4.76406	4.96657
ENST00000326499	VNN2	0.0276629	0.295654	2.894	down	6.98458	7.23993	4.60964	5.92893	7.77229	7.89924	8.33395	8.08033	7.73373	8.15343
ENST00000317012	ZBED2	0.00387526	0.178294	6.94966	down	4.83434	5.01045	7.02587	4.61657	6.06044	8.24754	9.47109	9.29984	7.9841	6.52981
ENCT00000146661	CATG00000024467.1	0.00423309	0.178576	3.63578	down	7.77137	7.17747	6.84696	8.45604	8.88311	9.10231	10.6877	9.3608	9.42964	9.86582
MICT00000301344	CATG00000083541.1	0.0344589	0.315878	2.73877	down	10.0256	10.4417	8.24211	8.77247	10.7736	10.8214	11.1548	12.0605	10.2507	11.2357
ENST00000267257	PXN	0.0476404	0.356023	2.38375	down	7.32936	6.17309	6.80528	5.34154	6.13347	7.55138	8.85301	8.01543	7.32041	6.30867
ENST00000373673	ATOH7	0.0107799	0.232555	3.24882	down	2.97471	2.93627	2.6831	5.04914	4.16754	4.57985	5.86552	5.28786	4.85696	5.72014
ENST00000457326	CAPNS2	0.0079349	0.217986	2.2484	down	2.97471	3.96922	3.76651	2.88098	4.49387	5.15458	4.99101	4.77372	4.43486	4.57561
ENST00000371027	ARHGAP19	0.00396046	0.178294	2.56743	down	2.97471	3.83781	2.6831	2.88098	4.29486	4.91138	4.44902	4.29167	4.8172	5.00382
ENST00000302805	SPRY3	0.0129364	0.241376	2.21474	down	2.97471	4.19201	4.00764	4.68863	4.68113	4.83672	5.4914	5.41367	4.83657	5.70145
ENST00000302182	UBB	0.000946001	0.137471	2.50191	down	2.97471	3.3954	3.97441	2.88098	3.80693	4.47146	5.2345	4.70637	4.79162	4.44362
ENST00000262144	WDR59	0.00397445	0.178294	2.02157	down	2.97471	3.47702	2.6831	2.88098	3.14403	3.27558	4.50463	3.91003	4.33506	4.21192
ENST00000366641	EGLN1	0.0148436	0.24879	2.2487	down	2.97471	3.14546	3.9546	2.88098	3.41354	4.58892	5.47005	4.45389	4.2624	3.43949
ENST00000312499	RMI2	0.030747	0.303932	2.5784	down	6.5235	5.94366	7.23087	8.06046	7.68095	7.64261	9.74984	8.41721	8.41093	8.05124
ENST00000256951	EMP1	0.0376285	0.329165	3.66602	down	2.97471	5.83988	7.07351	4.76166	6.13087	7.16014	8.24696	7.28185	6.71763	6.74512
MICT00000152804	CATG00000034317.1	0.00759765	0.215255	2.07215	down	4.78053	5.22725	4.33704	4.34982	5.86049	6.0119	6.02399	6.11469	5.69976	5.96044
ENST00000332629	WDR53	0.0458644	0.351304	2.9965	down	2.97471	4.68863	5.4979	6.40515	5.92909	5.8232	7.67281	6.71359	6.70863	6.49364
ENST00000462519	ANKUB1	0.00755016	0.215255	2.61534	down	8.04735	8.25582	7.66032	8.73573	9.70086	9.4012	9.97716	10.1265	9.5323	10.2979
ENST00000242257	MRM2	0.0146435	0.248725	3.35458	down	2.97471	4.23675	3.72485	5.48802	5.10111	5.571	7.12852	5.35629	5.70128	6.49902
ENST00000204961	EFNB1	0.00548647	0.193323	2.32018	down	2.97471	2.50407	3.64648	2.88098	3.28889	3.74807	5.17804	4.02726	3.91578	4.49717
ENST00000361441	APOBEC3C	0.0282192	0.295654	2.00242	down	2.97471	3.74482	4.39701	2.88098	3.89717	4.77535	5.31801	4.57826	4.38474	3.84706
ENST00000301391	CYB5D2	0.0210182	0.274866	2.98968	down	7.04358	6.22523	7.15253	8.97723	8.54027	8.85143	9.99297	9.03545	8.84351	9.11545
ENST00000392452	MB21D2	0.0224881	0.277335	3.00073	down	2.97471	3.4633	4.09227	2.88098	4.22471	5.19871	6.43686	5.68787	4.72074	3.51836
ENST00000379375	EDN1	0.00898794	0.219988	2.61785	down	2.97471	2.50407	3.85106	2.88098	3.08075	4.71046	5.54704	4.49739	3.84733	3.63126
ENST00000372756	MATN4	0.0170665	0.25897	2.36492	down	2.97471	3.70622	2.6831	4.70585	4.03228	4.18487	5.39869	5.0231	4.81364	4.89083
ENST00000396134	UMOD	0.00656751	0.204894	2.34947	down	4.43776	5.53455	4.9965	4.55937	6.05672	6.28874	6.42294	6.16772	6.87461	5.99257
ENST00000356970	CLCC1	0.00647365	0.2045	2.36352	down	2.97471	4.36827	4.20469	4.34413	4.88015	5.1418	5.31244	5.30496	5.34801	5.86943
ENST00000311148	ACOT1	0.0397983	0.334895	2.06328	down	5.54264	4.55017	5.4176	6.64811	5.6012	6.10796	7.55603	6.31546	6.22879	6.77619
ENST00000315330	CLEC1A	0.0363317	0.324259	2.21852	down	2.97471	2.50407	2.6831	4.6188	3.78031	3.71634	5.08204	4.49906	4.2244	4.78715
ENST00000366956	PTPN14	0.0147478	0.248725	2.75745	down	2.97471	3.55796	4.5253	2.88098	3.87054	4.96971	6.10977	5.50432	4.48244	4.05993
ENST00000519807	RPS20	0.0288896	0.295654	2.72882	down	6.16371	5.84473	3.88174	5.00987	6.81922	6.68698	7.45915	7.40404	6.43814	6.97235
ENST00000565468	TMEM178B	0.0063788	0.204082	2.80435	down	4.73675	4.57985	3.64588	5.40712	5.54684	6.1072	7.14687	5.99088	6.16597	5.94385
ENST00000433351	PCYOX1	0.000513173	0.133386	2.179	down	2.97471	3.64935	2.6831	2.88098	3.1268	3.96511	4.60756	4.11208	3.99398	4.25456
ENST00000262746	PRDX1	0.0241583	0.286329	2.25101	down	7.80174	8.98583	8.20647	6.99384	8.98475	9.27627	9.4185	9.12821	10.0542	8.94831
ENST00000377495	TMEM236	0.015606	0.253323	4.01532	down	5.45618	4.99486	4.19033	7.15466	7.01722	7.11773	8.77812	7.24703	7.53157	8.16637
ENST00000357872	LVRN	0.0216362	0.275734	2.1361	down	2.97471	4.12463	2.6831	2.88098	4.45803	4.61501	4.29441	4.13401	4.68731	4.86561
ENST00000295092	FAM84A	0.0317109	0.306712	2.71279	down	10.1431	10.7385	10.3493	9.7592	11.2603	11.3906	11.2378	13.6367	10.9149	12.2694
ENST00000377126	KLF9	0.00644963	0.20439	2.59056	down	2.97471	2.50407	2.6831	2.88098	2.70766	3.96528	5.54213	3.85528	3.83557	3.41859
ENST00000287727	ZFYVE9	0.0208147	0.274774	2.1092	down	2.97471	4.53604	2.6831	2.88098	4.02066	4.81128	4.41383	4.33828	4.60244	4.31316
ENST00000591589	RDH8	0.0204976	0.273829	2.21431	down	6.83894	7.57664	5.66476	6.15367	7.32592	7.79602	8.10263	8.12313	7.19514	8.07727
ENST00000329285	ZNF599	0.00121168	0.143374	3.65757	down	2.97471	3.44426	2.6831	4.41002	3.79658	4.69362	6.0161	5.01034	5.3032	5.63983
ENST00000199708	HBQ1	0.0175921	0.259951	2.09753	down	10.4478	11.1003	9.65896	10.1317	11.2924	11.3843	11.6283	11.9546	10.9795	12.0279
ENST00000592179	ANKRD29	0.00549544	0.193323	2.3001	down	5.78912	6.62964	5.3032	5.38996	6.77939	7.19629	6.93589	7.07308	7.29604	7.39851
ENST00000358204	TES	0.0238988	0.28519	3.29116	down	10.2972	10.4298	9.91549	10.5897	11.2357	11.4452	11.7922	14.1741	10.879	12.7702
ENST00000397820	C19orf38	0.0066077	0.205235	2.69621	down	9.092	8.77247	8.44629	10.0002	10.209	10.4769	11.4765	10.5175	10.4835	10.7203
ENST00000457749	ZNF28	0.00964197	0.224476	2.09604	down	2.97471	3.33327	3.76223	2.88098	3.16649	4.13835	5.3091	4.36958	3.83009	3.80889
ENST00000570682	GPR139	0.0393367	0.334011	2.05511	down	9.18524	9.90987	8.17133	8.64956	10.3211	10.1574	10.4643	10.5698	9.74956	10.4921
ENST00000340001	ABCA9	0.00140679	0.144862	2.23808	down	2.97471	2.50407	2.6831	2.88098	3.67001	4.00639	3.89442	3.89812	4.07654	4.64872
ENST00000479665	AZI2	0.0227119	0.27785	2.20727	down	2.97471	4.61682	2.6831	2.88098	4.14947	4.95928	4.55595	4.18713	4.64798	4.66605
NM_001318906	GLUD1	0.0172836	0.259951	2.17334	down	5.51639	6.31401	5.0027	4.21493	5.85578	6.4619	6.76407	6.65194	6.41464	6.21083
ENST00000452790	BZW1	0.00225832	0.16047	2.11117	down	2.97471	2.97171	2.6831	2.88098	3.45117	4.02898	4.73729	4.03823	4.12915	3.41827
ENST00000378509	SLC35B4	0.00266097	0.164715	2.32178	down	4.50418	5.39505	4.66531	4.96033	5.6895	6.21724	6.72803	6.38863	5.63991	6.3167
ENST00000303052	CSNK1G1	0.0458148	0.351304	2.14549	down	2.97471	3.2755	3.63406	5.27873	3.88321	4.3367	5.52756	5.04159	4.36045	5.28647
ENST00000361189	PJA2	0.00838568	0.219322	2.02947	down	2.97471	3.73032	3.80229	2.88098	4.19283	4.66444	4.94353	4.62365	4.40702	4.048
ENST00000315127	EDC3	0.0267634	0.292853	2.42398	down	2.97471	4.54249	2.6831	2.88098	4.76186	4.77613	5.13637	4.32775	4.81073	5.17907
ENST00000419304	AGR2	0.0275266	0.29521	2.86713	down	4.75462	5.72533	6.96172	4.91397	6.11232	8.04815	7.7593	6.79269	7.59268	5.87319
ENST00000217939	MXRA5	0.00449855	0.18049	3.39087	down	2.97471	2.50407	3.61767	2.88098	3.02557	4.83657	5.7522	5.52774	4.14511	3.54965
ENST00000379359	RGCC	0.0247113	0.288581	3.61594	down	2.97471	2.50407	5.40174	2.88098	4.02773	5.63357	6.23916	6.02508	5.29472	3.86856
ENST00000272164	WNT9A	0.0328193	0.310286	3.42169	down	2.97471	3.53186	5.48731	3.96023	4.76376	6.14784	7.61722	5.31834	6.07463	4.43338
ENST00000395869	MYL3	0.0216222	0.275734	2.26247	down	13.4651	14.0484	12.3345	12.8141	14.1701	14.387	14.6943	15.1163	13.8135	14.7105
ENST00000406189	MEX3C	0.0141868	0.247097	2.17569	down	2.97471	2.50407	2.6831	2.88098	3.79465	4.60437	4.78263	3.7972	4.04316	3.21752
ENST00000380680	UBL3	0.0424596	0.34181	2.84633	down	2.97471	3.62154	5.57808	2.88098	4.16006	5.53287	6.6053	5.54985	4.6482	4.42468
ENST00000371759	C1orf185	0.00563347	0.195363	2.43903	down	2.97471	3.88191	2.6831	2.88098	4.39877	4.4625	4.4742	4.61622	4.95086	4.74724
ENST00000221957	PLIN3	0.0372413	0.328268	2.03389	down	6.29007	6.86047	7.92701	6.67044	7.20548	8.10016	8.97012	8.14007	7.76627	7.09807
ENST00000260129	TGS1	0.00108961	0.143374	3.14681	down	2.97471	3.31301	2.6831	2.88098	4.44699	4.55296	5.23961	4.96304	4.86162	4.95102
ENST00000608372	SCOC	0.0144553	0.248725	2.30511	down	5.49412	4.9675	5.36249	6.45108	6.00956	6.32496	7.91386	6.43399	6.62171	7.01439
ENST00000261254	CCND2	0.0317186	0.306712	2.61874	down	4.90519	3.26287	4.08411	2.88098	3.36944	4.99331	5.97283	5.67498	5.13427	3.67157
ENST00000260526	ARHGAP29	0.0309106	0.304774	2.49071	down	5.18834	4.54764	5.75064	4.05387	5.11795	6.55869	7.46187	5.90749	6.36241	4.95075
ENST00000317502	MTG1	0.0018509	0.159642	3.30704	down	2.97471	3.86186	2.6831	2.88098	3.55338	5.21885	5.60536	4.81073	5.14881	3.798
ENST00000341998	SLC24A2	0.0141434	0.247097	2.12111	down	2.97471	3.79212	2.6831	4.04389	4.32224	4.90603	4.9612	4.64193	4.1343	4.5967
ENST00000222567	TWISTNB	0.0123343	0.237652	2.11259	down	2.97471	3.78952	2.6831	2.88098	4.41629	4.41063	4.17739	4.42592	4.65727	4.46847
ENST00000280098	SPOPL	0.0262009	0.291624	2.6542	down	2.97471	3.22807	4.11865	5.22378	5.00967	5.20104	6.34346	5.66863	4.85817	5.52496
ENST00000586696	ACSBG2	0.00326885	0.171714	2.5319	down	2.97471	3.88537	2.6831	3.95352	3.5542	4.52757	5.56602	4.57024	4.603	4.48519
ENST00000373091	GRIK3	0.036713	0.325456	2.03027	down	9.41479	9.4591	7.99648	8.76473	9.99297	9.96269	10.512	10.5703	9.37172	10.3198
ENST00000455942	SLC22A18AS	0.0451642	0.349344	2.12495	down	9.2477	9.3351	7.54876	7.88523	9.73758	9.63846	10.3768	9.95491	9.57156	9.64977
ENST00000322329	RPRML	0.00674209	0.205958	2.64192	down	4.90768	5.62814	4.64207	4.32458	6.30086	6.22644	7.04384	6.36464	6.42136	6.75501
ENST00000228865	CREBL2	0.0122388	0.236675	3.71432	down	2.97471	5.10779	3.51948	2.88098	5.13609	5.98885	6.392	5.73051	6.29398	4.67922
ENST00000360311	ZNF860	0.0139863	0.247097	2.15356	down	2.97471	2.50407	3.89083	2.88098	3.36746	4.28554	4.9406	4.64531	3.70659	3.57363
ENST00000260247	DCUN1D5	0.00513077	0.186398	2.15121	down	2.97471	3.96007	2.6831	2.88098	3.07281	4.52223	3.8228	3.73557	4.34734	4.66948
ENST00000378501	PLCB4	0.0249021	0.288624	2.29098	down	2.97471	4.4128	2.6831	2.88098	4.72137	4.76006	4.97369	4.8049	4.54197	4.57217
ENST00000255695	HRASLS2	0.0201676	0.27241	2.82369	down	2.97471	2.50407	4.84259	2.88098	4.13403	4.93576	5.55839	5.50648	4.7713	4.05238
ENST00000355528	TBCD	0.002866	0.165663	2.3317	down	6.35558	7.59291	6.99642	7.45225	7.94526	8.31494	8.70128	8.31464	8.7097	8.40877
ENST00000343813	ICMT	0.0148804	0.24879	2.57705	down	2.97471	4.9421	3.74784	2.88098	4.62892	5.2345	5.28853	5.39603	4.65815	5.42594
ENST00000423484	ZNF736	0.0181049	0.26181	2.01589	down	7.40778	6.55026	5.76803	6.2181	7.14739	7.50412	7.79657	8.15921	7.17861	7.51014
ENST00000230048	ACOT13	0.0354599	0.320189	2.09275	down	6.73595	7.17679	5.45078	5.28738	7.18607	7.52011	7.61357	7.39248	7.21543	7.42239
ENST00000483722	TREML2	0.0164069	0.257077	2.08013	down	4.7991	5.80021	4.83293	4.33982	6.11253	5.98707	6.15109	6.47365	6.07337	6.48276
ENST00000298125	WDFY2	0.0495519	0.360619	2.80796	down	8.22369	8.11578	5.40698	6.31602	8.68088	8.75585	9.2066	9.01246	8.43659	8.77948
ENCT00000360106	CATG00000080562.1	0.0112092	0.232588	2.80889	down	5.14352	4.6588	4.85452	6.5854	6.05124	6.23147	7.66083	6.96309	6.50596	7.38214
ENST00000312251	NAGPA	0.0215453	0.275734	3.58899	down	5.00565	4.29762	3.46801	6.52601	6.29062	6.62428	8.05782	6.74109	6.46248	6.92013
ENST00000378693	SOWAHA	0.00527788	0.189863	2.47022	down	2.97471	4.19468	2.6831	2.88098	4.19575	4.68525	4.77787	4.95324	4.50849	4.52757
ENST00000373387	GARNL3	0.0447654	0.348028	2.00004	down	4.24549	4.62958	2.6831	2.88098	4.23256	4.81376	4.98575	4.66408	4.22481	4.98347
ENST00000620771	HPCAL1	0.0216323	0.275734	2.38865	down	8.26259	8.2081	6.41491	7.56915	8.92889	8.85095	9.49869	9.31417	8.90123	9.09957
ENST00000372994	C9orf16	0.0353418	0.320038	2.32326	down	11.7427	12.0005	11.2772	11.4131	12.53	12.4389	12.5386	14.3198	12.059	13.6879
ENST00000512439	ZNF154	0.00310414	0.169473	2.01997	down	2.97471	3.45447	2.6831	2.88098	2.68839	3.82232	3.49233	4.44168	3.6047	4.39232
HBMT00000345316	CATG00000013852.1	0.0195288	0.269585	2.04947	down	7.11708	6.33376	6.00468	7.01828	7.19424	7.6566	8.75126	7.80939	7.34738	7.27969
ENST00000296930	NPM1	0.046804	0.353937	2.36747	down	8.68088	7.47613	8.91155	6.96262	8.50886	9.24024	10.365	10.0138	8.73845	8.39924
ENST00000397677	CHMP7	0.0156891	0.253949	2.17947	down	2.97471	4.03003	4.75487	4.29973	5.0348	5.3253	5.45377	5.6012	5.06239	5.27136
ENST00000644876	DDX3X	0.000234525	0.117633	2.35952	down	2.97471	3.36572	2.6831	2.88098	2.57216	3.80593	3.81533	4.24722	4.2709	4.52977
ENST00000237596	PKD2	0.0127902	0.240654	2.10191	down	2.97471	3.87629	3.58886	4.81451	4.22429	4.70031	4.64148	5.18079	5.33928	4.97532
ENST00000368644	GLRX3	0.00151931	0.149518	2.48074	down	7.09547	8.13546	8.57054	8.38529	8.31694	9.12143	9.60833	9.628	9.42282	9.27698
ENST00000252506	GADD45G	0.00481384	0.183457	9.7615	down	2.97471	3.31395	6.28959	2.88098	4.82011	7.33352	9.226	7.33671	6.9321	5.88654
ENST00000311268	GPR162	0.00233713	0.161406	2.01547	down	9.7752	10.3516	9.70885	9.78386	10.7677	10.8496	11.279	11.2484	10.8408	11.2251
NM_001355514	NPIPB2	0.0477811	0.356159	3.51197	down	10.6761	10.2308	7.13117	8.55815	10.4344	10.7936	11.3028	12.5905	10.3866	11.0184
HBMT00000827898	CATG00000052137.1	0.0175602	0.259951	2.33426	down	2.97471	4.32683	3.85523	4.93341	5.17606	5.24846	5.57298	5.30683	5.38422	5.86859
ENST00000331789	ACTB	0.00988725	0.22595	2.74593	down	2.97471	4.8385	3.94761	2.88098	4.43906	5.2832	5.57119	5.04952	5.77025	4.69318
ENST00000356166	FBRS	0.00219098	0.159642	2.12858	down	2.97471	3.24261	2.6831	2.88098	3.7888	3.8355	4.59566	3.95556	4.54227	4.09067
ENST00000305641	LCMT2	0.0464807	0.352378	2.71948	down	8.47037	8.67852	5.85614	7.14214	8.98226	9.16057	9.59273	9.69514	8.6353	9.26232
ENST00000506134	TRIM6	0.0245931	0.28795	2.50244	down	7.56484	9.65746	8.9002	7.68584	9.52972	9.77928	10.3644	9.95929	10.3948	9.45694
MICT00000300750	CATG00000088014.1	0.027156	0.294045	2.42624	down	2.97471	4.83456	4.04551	2.88098	5.16891	5.19681	5.37761	5.10779	5.10765	5.50842
ENST00000263160	SLC17A6	0.0137801	0.246002	2.25176	down	4.29657	3.89608	2.6831	4.05577	4.67952	4.96561	5.69878	4.98879	4.75083	5.06229
ENST00000261275	FAM189A1	0.03276	0.310222	2.0871	down	8.35446	7.96793	6.87766	7.38811	8.87555	8.75921	9.19025	9.66589	8.4369	8.71897
ENST00000450434	TRIM73	0.0471695	0.354832	3.01533	down	11.5459	12.3235	10.4043	10.5796	12.7645	12.5693	12.7677	14.8069	11.9072	13.5283
ENST00000274181	ADAMTS16	0.00203026	0.159642	2.51813	down	7.04582	7.96911	7.87172	7.75962	8.58409	9.03936	9.60657	9.40343	9.21101	8.63177
ENST00000263697	DNAJC8	0.00916257	0.221225	2.11337	down	8.74442	8.98262	7.91876	9.06737	9.62075	9.69868	10.268	10.1574	9.47712	10.1304
ENST00000612771	FADS6	0.0113538	0.232588	2.17254	down	2.97471	3.87331	2.6831	2.88098	4.42657	4.40377	4.75134	4.46526	4.49906	4.31618
ENST00000253381	DEFB118	0.0375999	0.329165	4.01179	down	9.1644	9.42466	6.97805	7.07351	9.94939	10.0439	10.1458	12.4749	9.50483	10.4417
ENST00000380591	BTF3	0.0188753	0.265844	3.47108	down	8.52948	7.59525	9.07753	6.6621	8.61731	10.0869	10.981	10.4953	9.38755	8.50792
ENST00000406869	MAD1L1	0.0270126	0.293925	2.07975	down	2.97471	4.15862	2.6831	2.88098	4.50237	4.07209	4.56064	4.45296	4.84652	4.54962
ENST00000245812	ALKBH7	0.0423605	0.34181	2.06621	down	5.01999	4.76418	5.83332	4.62966	5.20382	6.3967	7.08964	6.20066	6.23676	4.76214
ENST00000343818	PYCR2	0.0186804	0.264778	2.21254	down	8.7025	8.53409	6.97085	7.60713	8.97852	9.07	9.34237	9.63912	9.10634	9.36377
ENST00000233143	TMSB10	0.0397112	0.334672	3.3157	down	8.89228	8.66876	7.95947	5.63656	8.5277	9.73361	10.4482	10.2932	9.53917	8.31715
ENST00000476071	NSFL1C	0.00936957	0.222764	2.0466	down	2.97471	3.40147	3.53601	2.88098	3.00922	4.46183	4.5118	3.56125	4.90202	3.53164
ENST00000261336	PZP	0.00604536	0.199999	2.56498	down	6.77084	6.89302	6.71514	8.08174	7.84209	8.5914	9.12777	9.00399	7.84604	8.52837
ENST00000302649	TRH	0.026868	0.293173	2.26893	down	7.94184	8.03355	6.54336	6.08594	8.11287	8.62017	8.54552	8.79442	8.42358	8.24395
ENST00000382108	SPATA13	0.0326434	0.310008	2.77728	down	7.61911	8.53845	5.89653	7.17073	8.70317	9.01518	9.54164	9.58675	8.14882	9.00399
ENST00000276410	CHRNA6	0.0100736	0.227335	2.29798	down	6.63617	6.36253	7.11178	7.7048	7.65486	7.97924	9.09648	8.28694	7.68259	8.42672
ENST00000514985	SELENOP	0.0133834	0.244451	2.03213	down	5.26091	4.93839	4.80783	5.7667	5.60613	6.12374	7.35387	5.97283	6.08962	5.95486
ENST00000615648	EPPK1	0.0492017	0.359747	2.32901	down	2.97471	5.48047	5.18034	5.56602	5.69682	5.91904	6.42177	6.42378	5.81255	6.41983
ENST00000287461	ZNF689	0.0446879	0.347968	2.50639	down	10.2822	10.165	7.89924	9.11545	10.8521	10.882	11.3946	11.3028	10.2996	11.063
ENST00000635782	AGBL1	0.0273925	0.294555	3.02717	down	11.2127	11.5926	10.3846	10.5381	12.0565	12.0819	12.2688	14.4689	11.6767	13.278
ENST00000376701	WAS	0.0124232	0.237892	2.76373	down	2.97471	4.34224	2.6831	4.40219	4.89948	5.154	5.53483	5.6036	4.85435	5.48802
ENST00000615603	FOXP1	0.0250008	0.288809	2.21919	down	2.97471	4.56317	2.6831	2.88098	4.42376	4.40838	4.90993	4.61296	4.50534	4.8393
ENST00000337231	CDR2L	0.0277537	0.295654	3.61109	down	2.97471	2.50407	5.63751	2.88098	4.30233	5.65724	6.72194	5.16456	5.59183	4.42619
ENST00000314400	NEPRO	0.0278557	0.295654	2.35811	down	2.97471	3.78416	4.6631	2.88098	4.01905	5.0685	5.97076	4.97346	4.29594	4.20148
ENCT00000107971	CATG00000013576.1	0.0242786	0.287297	2.36792	down	2.97471	4.47917	2.6831	2.88098	3.88082	4.68353	5.37148	4.46889	4.95645	3.63653
ENST00000392711	PRKAR1A	0.00305374	0.169473	2.2934	down	2.97471	3.7856	2.6831	2.88098	3.4906	4.3805	4.18333	3.99288	5.11872	4.12702
ENST00000357985	FAM3B	0.0156816	0.253949	2.00495	down	2.97471	3.76323	2.6831	3.98055	4.34868	4.24483	4.87572	4.49271	4.54627	4.60858
ENCT00000254926	CATG00000052012.1	0.026125	0.291613	2.07343	down	4.21629	4.6212	3.53476	2.88098	5.00649	5.12676	5.10607	5.3156	5.05977	4.9116
ENST00000510508	DIO3	0.0280854	0.295654	3.21079	down	2.97471	3.03808	4.11718	3.94552	4.00862	5.43998	7.0342	5.86416	4.48519	3.67522
ENST00000375734	RND3	0.0147345	0.248725	2.58477	down	4.78455	5.16913	5.83538	4.33592	5.07414	6.61366	7.53084	6.36452	6.31051	5.22977
ENST00000375774	ING1	0.0323512	0.309202	2.24835	down	2.97471	4.40149	3.74935	2.88098	5.24721	4.91307	5.23081	4.82626	4.96513	5.16279
ENST00000370238	GCLM	0.000831285	0.134642	2.71984	down	2.97471	2.50407	2.6831	2.88098	2.96938	3.92218	5.12975	3.87584	3.73961	4.56249
ENST00000388718	FLG2	0.00174038	0.159642	2.08671	down	2.97471	3.43285	2.6831	2.88098	3.09954	4.02823	3.63317	3.79301	4.75669	4.16624
ENST00000272203	PLEKHA6	0.0215962	0.275734	2.71107	down	2.97471	3.19293	4.59073	2.88098	3.61019	4.84119	5.51571	6.01875	4.16568	3.90252
ENST00000336904	SNCA	0.0137573	0.245876	2.37554	down	2.97471	4.45609	3.44644	2.88098	4.80503	4.75016	4.93219	4.92802	4.99832	5.19582
ENST00000404537	OBSL1	0.0226163	0.277335	2.11691	down	2.97471	3.36562	2.6831	4.54585	4.01343	4.00676	5.10846	4.61318	4.73562	4.52848
ENST00000521381	PIK3R1	0.0124974	0.239019	3.42207	down	2.97471	4.18747	4.68814	2.88098	4.54764	5.89932	6.47528	6.39041	4.74073	4.64755
ENST00000366618	SLC35F3	0.0157241	0.253949	2.31288	down	2.97471	4.25411	2.6831	4.47786	4.4558	4.99663	5.13119	5.1086	4.95696	4.70065
ENST00000297991	AQP3	0.0324248	0.309202	2.50736	down	9.3569	9.07234	7.65776	8.94253	10.0106	9.89302	10.3441	11.5006	9.47422	10.4591
ENST00000372237	TMEM53	0.013709	0.245557	3.10907	down	6.99772	6.48276	6.31114	8.09164	8.29401	8.44265	10.1066	8.86224	8.30057	8.64768
ENST00000450142	PPP1R12A	0.00329478	0.171915	4.15541	down	6.41766	7.10454	5.27136	5.93565	7.7514	8.57302	9.17152	8.83917	8.46162	7.71023
ENST00000304916	FAM84B	0.0199299	0.270883	2.14087	down	2.97471	2.50407	4.09471	2.88098	2.79556	4.38557	5.08038	3.76533	3.73405	3.77569
ENST00000372524	ZNF503	0.0177045	0.259951	3.75002	down	2.97471	3.77047	4.53151	2.88098	4.77877	6.20757	7.30001	5.2368	5.47955	4.247
ENST00000512524	MTRNR2L5	0.00808584	0.218324	2.44504	down	7.75363	7.01199	7.72253	6.54931	7.53678	8.44212	9.01666	8.37261	9.42711	7.76503
ENST00000264234	UPK1B	0.0359269	0.322719	4.05877	down	2.97471	3.47395	6.99133	4.02014	4.79202	6.83319	7.51372	6.55599	6.30361	5.15085
ENST00000556492	NAA30	0.0128994	0.241376	2.07267	down	2.97471	3.81143	3.73891	4.66354	4.04389	4.46936	5.34465	5.34692	4.60686	4.72215
ENST00000579991	DYNLL2	0.00948432	0.223841	2.23815	down	5.90428	5.40225	4.5052	4.85983	6.33511	6.64478	6.62546	6.68297	6.2463	6.6187
ENST00000391767	CACNG7	0.0217493	0.275734	2.73197	down	2.97471	4.70998	3.89966	4.55101	5.76915	5.79579	6.25502	6.19874	5.04628	5.85839
ENST00000342480	PODXL2	0.0196979	0.270329	2.08613	down	5.05989	4.47002	5.9087	6.20137	5.68679	7.17168	6.33311	6.16753	6.21939	6.73918
ENST00000421176	ZNF284	0.00431289	0.178576	2.03619	down	2.97471	2.50407	2.6831	2.88098	3.44773	4.22969	4.53042	3.88918	3.50538	3.46528
ENST00000292427	CYP11B1	0.0167719	0.257186	3.32098	down	6.96415	6.03399	6.39424	8.36985	8.4181	8.40172	10.0756	8.71678	8.66642	8.97785
ENST00000392465	RNF34	0.0178544	0.260919	2.04835	down	2.97471	3.56092	2.6831	2.88098	4.19848	3.80763	5.07037	4.07157	4.31118	4.20977
ENST00000323716	ARMC10	0.0125171	0.239102	2.22137	down	2.97471	2.50407	2.6831	2.88098	3.35583	4.08764	4.9921	4.46279	3.26567	3.34776
ENST00000266068	GMEB2	0.0267103	0.292853	2.75211	down	4.31017	4.56563	5.18819	6.74012	6.04734	6.19748	7.72977	7.0342	6.19964	6.99304
ENST00000300452	COQ4	0.0385375	0.331978	2.60768	down	11.3339	11.1628	9.27978	9.7131	11.4826	11.5082	11.8588	13.1072	11.2412	12.1705
ENST00000389386	VPS9D1	0.0140769	0.247097	2.25193	down	7.44447	7.17024	5.95354	6.82725	8.01497	7.90735	8.72213	8.34015	7.93818	8.35847
ENST00000302327	ING2	0.0385041	0.331978	2.55389	down	2.97471	3.53045	4.68204	2.88098	4.22331	5.21256	6.28594	4.82659	5.06913	3.66074
ENST00000358536	PLXNB1	0.0165281	0.257077	2.3738	down	7.92506	7.91406	6.21521	7.35667	8.38529	8.58768	9.2438	9.06647	8.25297	8.88139
ENST00000383657	HACD2	0.0165149	0.257077	2.69323	down	2.97471	5.21685	3.50781	4.52345	5.24736	5.44919	5.87806	5.76016	5.44919	6.08027
ENST00000376911	ANXA1	0.0241595	0.286329	2.04754	down	4.94822	6.45252	6.20809	5.15372	5.66065	6.85921	7.46147	6.30902	6.82693	6.13603
ENST00000642647	SLC29A3	0.0467477	0.353885	2.92077	down	4.35651	3.79537	5.13186	2.88098	4.58881	6.28286	7.39248	5.34849	5.24278	4.21866
ENST00000397033	ITGA4	0.0144236	0.24864	2.30912	down	4.24775	2.95455	2.6831	2.88098	3.42297	4.04434	5.40335	3.85089	4.53471	4.39277
ENST00000455833	IFFO2	0.0350922	0.31909	2.02154	down	10.903	11.2667	9.45332	10.2443	11.5994	11.5472	11.8851	11.9249	11.3188	11.8679
ENST00000618619	RPL17	0.0334643	0.312223	2.30787	down	9.88676	10.5987	11.2652	9.2095	10.9483	11.6975	12.1537	11.6088	11.9786	10.5027
ENST00000410027	CCDC103	0.0193397	0.268973	2.1024	down	8.32426	7.9159	6.45108	7.70231	8.49304	8.67315	9.00946	8.96979	8.68088	8.91349
HBMT00000302021	CATG00000008307.1	0.00347961	0.173361	2.18004	down	2.97471	3.88381	3.48121	2.88098	3.96501	4.37537	4.49637	4.37012	4.37429	5.19134
ENST00000457091	GRID2IP	0.0464486	0.352378	2.24162	down	5.14719	4.83802	3.49687	2.88098	5.28533	5.17957	5.85646	5.61524	5.35232	5.4675
ENST00000378700	ID4	0.0495355	0.360619	2.43032	down	2.97471	2.50407	5.28445	2.88098	3.81641	5.12448	5.10799	5.08444	3.84059	4.70887
ENST00000491763	LEKR1	0.0215005	0.275734	2.02636	down	2.97471	4.33175	2.6831	2.88098	4.18181	4.29911	4.49913	4.36827	4.28843	4.69187
ENST00000397897	AL591025.1	0.0120591	0.234904	2.72097	down	2.97471	2.50407	2.6831	4.63295	4.01394	4.21954	5.046	4.9278	4.62695	5.20909
ENST00000232607	UMPS	0.0275324	0.29521	2.18726	down	2.97471	4.74179	4.25684	2.88098	4.53831	4.90732	4.77671	5.26239	4.68598	5.40584
HBMT00000826714	CATG00000051873.1	0.0418689	0.341675	2.11964	down	2.97471	3.63991	4.5181	5.17194	5.10846	5.12826	5.78131	5.41221	5.0263	5.48414
MICT00000359999	CATG00000108425.1	0.0267995	0.292853	2.27098	down	2.97471	4.27388	4.72311	4.08954	5.16541	5.58447	5.146	6.22931	4.83075	5.3527
ENST00000206423	CCDC80	7.18854e-05	0.115232	2.77113	down	4.36671	3.96117	4.06737	4.34507	4.11968	5.3029	6.10401	6.06056	5.40335	5.34154
ENST00000641251	OR4C6	0.0485816	0.358517	2.09674	down	2.97471	3.90965	4.57314	5.43704	4.80735	5.29932	6.14784	5.16302	5.2668	5.16563
ENST00000265022	DGKG	0.016978	0.258562	2.2091	down	2.97471	4.31787	2.6831	2.88098	4.20251	4.34868	4.22481	4.69234	5.06986	4.44078
ENST00000290363	CIART	0.00850726	0.219322	2.43115	down	5.3016	5.55515	4.33751	4.44871	5.81731	6.24704	6.76837	6.22048	6.93558	5.69699
ENST00000260379	RPLP1	0.0411757	0.340011	2.01322	down	2.97471	3.66654	4.89895	4.88819	4.75257	5.43928	5.46626	5.51811	4.84039	4.96446
ENST00000397967	RNASE1	0.0265229	0.292063	2.22562	down	2.97471	4.45503	2.6831	2.88098	4.625	4.9164	4.47902	4.60991	4.60182	4.78271
ENST00000320316	PHF23	0.00588378	0.198378	2.15935	down	2.97471	3.69498	3.65196	2.88098	3.41773	4.87813	5.11337	4.35089	3.98015	3.85081
ENST00000376901	YIF1A	0.00870228	0.219651	2.55417	down	8.3431	8.66964	7.10125	7.73584	9.14911	9.13597	9.90603	9.88541	9.23581	9.6
ENST00000439838	AC004832.3	0.0260583	0.291497	2.40369	down	2.97471	4.66605	2.6831	2.88098	4.69856	4.54432	4.91526	5.09507	4.65784	5.01719
ENST00000399562	C22orf39	0.0125933	0.239798	2.09509	down	7.28681	7.8961	6.47156	6.83725	8.17507	8.39667	8.62786	8.46543	8.02315	8.48872
ENST00000251170	SEC14L5	0.0343094	0.315169	2.06231	down	2.97471	4.26921	4.27206	4.92458	5.11575	5.00047	5.82298	4.98402	5.35952	5.61064
ENST00000392607	ADGRA1	0.0380346	0.33045	2.12105	down	10.5631	11.3615	9.38677	9.76064	11.3809	11.5111	11.7398	11.929	10.9909	11.7061
ENST00000272298	CALM2	0.0210404	0.274922	2.05522	down	5.86482	5.0688	5.66169	6.49135	5.84281	6.48579	7.88699	6.89903	6.29887	6.55525
ENST00000314644	OR4C15	0.0182972	0.262842	2.14305	down	2.97471	4.21755	2.6831	2.88098	4.22847	4.05775	4.61226	4.33993	4.96672	4.50649
ENST00000602198	TEX101	0.00303955	0.169473	2.62907	down	9.70759	11.2915	9.55513	9.8008	10.2634	11.1495	11.4212	11.5854	11.6809	11.7542
ENST00000377745	HIST1H4F	0.0253674	0.289792	2.15777	down	5.03591	4.4222	5.68399	4.70306	5.67775	6.15712	7.23226	6.18856	6.24663	5.24604
ENST00000616623	CRY2	0.00525818	0.189697	2.05028	down	8.91942	8.68972	8.10487	8.9946	9.55159	9.66119	10.283	10.0836	9.50914	9.90235
ENST00000265643	GAL	0.0450247	0.34865	2.00774	down	4.81177	4.82671	2.6831	3.99814	4.84354	5.00785	5.28927	5.28659	5.24546	5.36194
ENST00000339098	CERKL	0.00889818	0.219651	5.05118	down	2.97471	4.0742	2.6831	6.05717	5.38119	6.04081	7.12008	6.46035	6.57931	6.65292
ENST00000334849	KRTAP19-7	0.0103348	0.230008	2.32131	down	2.97471	3.92012	3.76075	2.88098	4.70477	4.81192	5.27376	4.90927	4.3808	4.94029
ENST00000550536	RAB3IP	0.0285802	0.295654	2.02336	down	7.33906	8.23002	6.46549	7.04341	8.37894	8.51734	8.45318	8.68056	8.0839	8.8057
ENST00000372628	TCEAL3	0.0025431	0.163529	2.42771	down	2.97471	4.18982	3.43285	2.88098	3.98297	4.53573	5.11476	5.1029	4.59048	4.51543
ENST00000515022	TRIM6	0.034919	0.318076	2.46642	down	7.09435	9.62134	9.06148	7.71737	9.226	9.56642	10.037	9.89199	10.3576	9.37956
MICT00000051369	CATG00000001245.1	0.0115725	0.232588	2.72832	down	6.98674	7.13785	5.14748	6.27544	7.50275	7.75363	8.50769	8.34357	7.75714	7.9283
ENST00000310325	CTSF	0.000548978	0.133386	2.51624	down	2.97471	3.33009	2.6831	2.88098	3.76015	4.03323	4.86949	4.23159	4.52848	4.62258
ENST00000085068	ISOC2	0.00636765	0.204082	2.34774	down	2.97471	4.44182	2.6831	3.903	4.01368	4.74292	4.78595	4.73299	4.9032	5.00763
ENST00000420658	AFAP1	0.00416339	0.178576	2.03506	down	2.97471	3.79901	3.89573	2.88098	3.38179	4.60858	4.80902	3.9581	4.53006	4.15181
ENST00000332822	NOG	0.00390437	0.178294	5.74273	down	2.97471	2.50407	4.22691	2.88098	3.26437	5.52213	7.43821	6.11372	5.3901	3.99556
ENST00000332272	CHST6	0.00730186	0.2141	2.32534	down	7.54708	8.14882	6.67023	7.80973	8.53735	8.68934	9.24024	9.11289	8.60581	9.15215
ENST00000321429	DUOX1	0.00994638	0.22595	2.16696	down	2.97471	4.08844	2.6831	4.11809	3.92241	4.62089	4.8008	4.16624	4.93364	4.84354
ENST00000330261	PPP1R27	0.0268129	0.292853	2.278	down	5.95053	6.56726	4.85782	6.70694	7.17734	7.1198	7.80665	7.86805	6.95516	7.44905
MICT00000038370	CATG00000117636.1	0.0192156	0.26869	2.15585	down	2.97471	4.4793	3.41481	2.88098	4.52513	4.31451	4.94283	4.72604	4.77886	5.05396
ENST00000491306	RPL37A	0.0394563	0.334011	2.51515	down	10.3586	11.4495	12.598	10.4189	12.2407	12.7214	13.6125	12.8098	12.7858	11.7896
ENST00000323760	CDC25C	0.00178809	0.159642	2.0347	down	2.97471	2.50407	2.6831	2.88098	3.43769	3.86954	3.63108	3.67308	3.91679	4.51413
ENST00000432829	DOCK8	0.0252442	0.289768	3.18018	down	7.53084	7.59185	5.12393	5.94461	8.31117	8.40313	9.04805	8.78614	8.21898	8.39164
ENST00000394555	EFEMP1	0.000134197	0.115232	2.14578	down	2.97471	2.50407	2.6831	2.88098	3.1445	3.90154	4.03779	4.24173	3.98236	3.53145
ENST00000278319	ZNF215	0.0102134	0.228501	2.14982	down	2.97471	4.41026	3.99834	2.88098	4.30199	4.78113	4.79296	4.94753	4.85837	4.70736
ENST00000400546	NCAM2	0.0119756	0.234904	2.37983	down	2.97471	3.87716	4.28319	4.87189	4.87242	4.97994	5.35952	5.47914	5.37074	5.94433
ENST00000394299	GPC3	0.0244783	0.28795	2.43713	down	2.97471	4.79182	2.6831	2.88098	4.6115	4.9935	5.02216	4.89817	4.57093	4.88327
ENST00000389658	LAMA1	0.0159457	0.254406	2.63878	down	4.47985	4.33393	2.6831	4.05536	5.424	5.56096	5.73803	5.89856	5.15173	5.62633
ENST00000354670	BMF	0.00812643	0.218617	3.4591	down	5.17426	5.17011	6.03672	7.07559	6.85277	7.37124	8.98014	7.78377	7.15498	7.9713
ENCT00000029680	CATG00000069722.1	0.00642649	0.20439	2.1614	down	2.97471	4.17493	2.6831	2.88098	3.68256	4.26419	4.35331	4.40595	4.11412	4.81853
ENST00000574081	SCIMP	0.0150577	0.250072	2.09662	down	8.96419	9.35204	8.04528	8.90947	9.92132	9.95548	10.4999	10.283	9.56677	10.2275
ENST00000642475	TM9SF2	0.00218334	0.159642	2.24201	down	2.97471	4.19997	3.5637	4.01321	4.32116	4.82645	5.09673	4.69983	5.10578	5.16794
ENST00000531323	UQCC3	0.0224777	0.277335	2.50172	down	6.23515	5.5863	4.61784	6.86047	6.61563	6.50695	7.94482	7.35316	7.15033	7.57476
ENST00000458659	TSC22D1	0.012702	0.240049	2.51499	down	2.97471	4.11773	4.19312	4.62781	4.49467	5.46257	6.47327	5.35327	5.07829	4.69339
ENST00000334680	KRTAP22-1	0.00451505	0.18049	2.48383	down	2.97471	4.34304	3.46405	2.88098	4.28377	4.67477	5.15893	4.87559	4.58688	5.21322
ENST00000569302	C15orf41	0.000756364	0.133386	2.07304	down	2.97471	3.65419	2.6831	2.88098	3.34523	4.14909	4.42715	3.82031	4.16558	4.23481
ENST00000356387	ORAI2	0.00753022	0.215255	2.3158	down	5.96935	5.86416	5.42091	7.0001	7.05226	7.14044	7.70231	7.42433	7.41796	7.67929
ENST00000569878	HYKK	0.00100069	0.141452	2.29028	down	2.97471	2.97953	2.6831	2.88098	3.43197	3.49516	4.07449	4.59532	4.16982	4.59315
ENST00000376442	DHX16	0.0198902	0.270883	2.52043	down	6.39651	6.99367	7.21803	7.68931	8.03114	7.84963	9.96654	8.51658	8.49294	8.17133
ENST00000337343	DGKH	0.0111339	0.232588	2.02019	down	5.57119	5.66663	4.55803	5.54001	5.94499	6.23626	7.26118	6.37335	6.29007	6.19245
ENST00000331666	EIF3C	0.0477136	0.356023	2.29718	down	7.61324	7.47709	4.94334	6.32002	7.24911	7.72495	8.10454	8.3177	7.67929	7.77564
ENST00000252797	ZNF764	0.0183071	0.262842	2.02786	down	2.97471	3.9742	2.6831	2.88098	3.01164	4.71651	4.59419	3.61186	4.29314	3.40874
ENST00000621517	GJA5	0.0182613	0.262842	3.88118	down	2.97471	2.50407	4.05936	2.88098	2.40763	5.04772	6.49364	5.46528	4.73442	2.86817
ENST00000283249	ITGB6	0.00358536	0.176875	2.10047	down	2.97471	3.50538	2.6831	2.88098	2.99889	4.14012	4.86714	4.04873	3.83514	3.50552
ENST00000250454	EAPP	0.0112678	0.232588	2.55315	down	2.97471	2.50407	3.4063	2.88098	3.68272	4.75056	5.34186	4.89035	3.41416	3.81325
ENST00000559228	MINDY2	0.00563929	0.195363	2.92867	down	2.97471	3.00401	2.6831	2.88098	3.58082	4.70387	5.65176	5.10184	3.61568	3.80171
ENST00000322776	NDUFV1	0.00131256	0.143374	3.14948	down	2.97471	4.07654	2.6831	2.88098	4.33267	4.9172	5.09991	5.00659	4.96759	5.23229
