# Supplementary material for: Differential lncRNA/mRNA expression profiling and ceRNA network analyses in amniotic fluid from foetuses with ventricular septal defects
Source: PeerJ. 2023 Feb 27;11:e14962. doi: 10.7717/peerj.14962 (PMC9979828; doi:10.7717/peerj.14962)
Supplement: Supplemental Information 5 [file peerj-11-14962-s005.xlsx]

## Sheet: IDS
Sample Name	IDS	GAPDH	SD	average	△CT	△△CT	2^△△CT（processing group）	Sample Name	IDS	GAPDH	SD	average	△CT	△△CT	2^△△CT（Control group）
T1	31.8395	25.9461	0.0918496	31.8749	5.82108	-2.156	0.224378	N1	30.4978	26.2322	0.382902	30.4575	3.97519	-0.31011	0.80658
T1	31.9792	26.1817	0.11908	26.0538				N1	30.056	27.0149	0.46156	26.4823
T1	31.806	26.0336						N1	30.8186	26.1997
T2	31.507	26.4126	0.43602	31.5076	5.09713	-1.43206	0.370602	N2	26.6077	22.6898	0.238244	26.442	3.72915	-0.0640744	0.956559
T2	31.944	26.4697	0.0602758	26.4105				N2	26.169	22.7822	0.0611581	22.7129
T2	31.0719	26.3492						N2	26.5493	22.6666
T3	28.5385	22.2561	0.109059	28.4668	6.2353	-2.57022	0.168378	N3	29.035	25.7423	0.68372	29.0352	3.13916	0.525924	1.43986
T3	28.3413	22.3015	0.0849872	22.2315				N3	29.719	26.2107	0.272516	25.8961
T3	28.5207	22.1369						N3	28.3516	25.7352
T4	31.4161	25.2867	0.0932505	31.5093	6.16169	-2.49661	0.177192	N4	28.097	24.1052	0.240937	28.0972	4.06126	-0.396177	0.759869
T4	31.6026	25.5466	0.176624	25.3476				N4	27.8563	23.9901	0.0610397	24.0359
T4	31.509	25.2095						N4	28.3382	24.0124
T5	31.599	26.8168	0.22888	31.5996	4.99859	-1.33351	0.396802	N5	30.247	27.0035	0.277201	30.2471	3.13291	0.532169	1.4461
T5	31.8288	26.4408	0.19405	26.601				N5	30.5243	27.1592	0.0963703	27.1142
T5	31.3711	26.5456						N5	29.9699	27.1798
T6	33.467	28.8587	0.30674	33.1602	4.16904	-0.503965	0.705166	N6	28.8574	25.4051	0.20117	28.6847	3.34981	0.315266	1.24424
T6	33.16	28.9956	0.130226	28.9911				N6	28.4638	25.1461	0.165313	25.3349
T6	32.8535	29.119						N6	28.7331	25.4536
T7	31.1035	26.2872	0.139215	31.1681	5.11047	-1.44539	0.367192	N7	31.9353	27.6751	0.0183113	31.9166	4.21096	-0.545876	0.684975
T7	31.3279	25.9662	0.200133	26.0576				N7	31.8987	27.8008	0.0840997	27.7057
T7	31.0729	25.9196						N7	31.916	27.6412
T8	32.235	27.8186	0.0902552	32.2356	4.3428	-0.677722	0.625151	N8	31.1915	28.6344	0.0479324	31.2393	3.05562	0.609463	1.52569
T8	32.1456	27.9819	0.0826402	27.8928				N8	31.2874	27.8481	0.405618	28.1837
T8	32.3261	27.8779						N8	31.239	28.0685
T9	34.8023	30.7249	0.212931	34.581	3.89867	-0.233593	0.850514	N9	32.2778	28.7047	0.229312	32.057	3.31718	0.347898	1.27271
T9	34.3775	30.6401	0.0423881	30.6824				N9	31.8201	28.8798	0.126047	28.7399
T9	34.5633	30.682						N9	32.0732	28.6351
T10	31.6119	26.7178	0.176088	31.7877	5.07765	-1.41257	0.375643	N10	32.024	27.6697	0.143687	32.0244	4.39654	-0.731457	0.602295
T10	31.9641	26.5581	0.148205	26.71				N10	32.1682	27.5809	0.0446139	27.6278
T10	31.787	26.8542						N10	31.8808	27.6328
T11	30.972	25.6689	0.750565	30.9721	4.97414	-1.30907	0.403582	N11	30.1	26.1379	0.71735	30.1004	3.94811	-0.283026	0.821865
T11	30.2216	26.0772	0.297428	25.998				N11	30.8179	26.5622	0.402915	26.1523
T11	31.7227	26.2477						N11	29.3832	25.7568
									The average expression of the control group				3.66508
							Final summary
							Sample Name	T	N
							1	0.224378	0.80658
							2	0.370602	0.956559
							3	0.168378	1.43986		P<0.001
							4	0.177192	0.759869
							5	0.396802	1.4461
							6	0.705166	1.24424
							7	0.367192	0.684975
							8	0.625151	1.52569
							9	0.850514	1.27271
							10	0.375643	0.602295
							11	0.403582	0.821865

## Sheet: NR2F2
Sample Name	NR2F2	GAPDH	SD	average	△CT	△△CT	2^△△CT（processing group）	Sample Name	NR2F2	GAPDH	SD	average	△CT	△△CT	2^△△CT（Control group）
T1	31.658	25.9461	0.20431	31.6585	5.60466	1.81032	3.50719	N1	32.3693	26.2322	0.26082	32.6301	6.14783	1.26715	2.40685
T1	31.4544	26.1817	0.11908	26.0538				N1	32.891	27.0149	0.46156	26.4823
T1	31.863	26.0336						N1	32.63	26.1997
T2	32.6884	26.4126	0.0634057	32.7515	6.34103	1.07395	2.10519	N2	30.8673	22.6898	0.175159	30.6779	7.96507	-0.550091	0.682977
T2	32.8152	26.4697	0.0602758	26.4105				N2	30.5217	22.7822	0.0611581	22.7129
T2	32.751	26.3492						N2	30.6448	22.6666
T3	27.6349	22.2561	0.381753	28.0297	5.7982	1.61678	3.0669	N3	33.5235	25.7423	0.00539503	33.5286	7.63255	-0.217577	0.860009
T3	28.0573	22.3015	0.0849872	22.2315				N3	33.5343	26.2107	0.272516	25.8961
T3	28.3969	22.1369						N3	33.528	25.7352
T4	30.629	25.2867	0.340153	30.6292	5.28162	2.13335	4.38736	N4	31.428	24.1052	0.142171	31.4285	7.39265	0.0223297	1.0156
T4	30.9694	25.5466	0.176624	25.3476				N4	31.2866	23.9901	0.0610397	24.0359
T4	30.2891	25.2095						N4	31.571	24.0124
T5	32.679	26.8168	0.000684273	32.6792	6.07813	1.33685	2.52599	N5	36.2937	27.0035	0.271303	36.0222	8.90806	-1.49308	0.355253
T5	32.6786	26.4408	0.19405	26.601				N5	35.751	27.1592	0.0963703	27.1142
T5	32.6799	26.5456						N5	36.022	27.1798
T6	34.885	28.8587	0.0800075	34.885	5.89388	1.52109	2.87008	N6	34.3111	25.4051	0.29576	34.5637	9.22881	-1.81383	0.284435
T6	34.965	28.9956	0.130226	28.9911				N6	34.491	25.1461	0.165313	25.3349
T6	34.805	29.119						N6	34.8891	25.4536
T7	31.742	26.2872	0.162757	31.7426	5.68498	1.73	3.31728	N7	34.5176	27.6751	0.0693477	34.5866	6.88095	0.534023	1.44796
T7	31.9057	25.9662	0.200133	26.0576				N7	34.586	27.8008	0.0840997	27.7057
T7	31.5802	25.9196						N7	34.6563	27.6412
T8	33.0694	27.8186	0.104146	33.1734	5.2806	2.13438	4.39048	N8	35.789	28.6344	0.2675	36.0563	7.87265	-0.457674	0.728159
T8	33.173	27.9819	0.0826402	27.8928				N8	36.324	27.8481	0.405618	28.1837
T8	33.2777	27.8779						N8	36.056	28.0685
T9	34.986	30.7249	0.0695006	35.0553	4.37298	3.04199	8.23629	N9	32.7925	28.7047	0.778315	33.5705	4.83066	2.58431	5.9973
T9	35.125	30.6401	0.0423881	30.6824				N9	33.57	28.8798	0.126047	28.7399
T9	35.055	30.682						N9	34.3491	28.6351
T10	32.06	26.7178	0.569493	32.06	5.35003	2.06495	4.18419	N10	34.573	27.6697	0.350874	34.5735	6.9457	0.46928	1.38442
T10	32.6295	26.5581	0.148205	26.71				N10	34.2229	27.5809	0.0446139	27.6278
T10	31.4906	26.8542						N10	34.9246	27.6328
T11	31.1688	25.6689	0.173811	31.3424	5.34448	2.0705	4.20031	N11	33.232	26.1379	0.605988	33.9121	7.75982	-0.344839	0.787396
T11	31.5165	26.0772	0.297428	25.998				N11	34.3947	26.5622	0.402915	26.1523
T11	31.342	26.2477						N11	34.1096	25.7568
									The average expression of the control group				7.41498
							Final summary
							Sample Name	T	N
							1	3.50719	2.40685
							2	2.10519	0.682977
							3	3.0669	0.860009
							4	4.38736	1.0156		P=0.002
							5	2.52599	0.355253
							6	2.87008	0.284435
							7	3.31728	1.44796
							8	4.39048	0.728159
							9	8.23629	5.9973
							10	4.18419	1.38442
							11	4.20031	0.787396

## Sheet: GPC3
Sample Name	GPC3	GAPDH	SD	average	△CT	△△CT	2^△△CT（processing group）	Sample Name	GPC3	GAPDH	SD	average	△CT	△△CT	2^△△CT（Control group）
T1	31.457	27.426	0.2445	31.2123	3.62402	-1.90376	0.267246	N1	28.945	26.9943	0.206555	29.1514	2.05386	-0.333602	0.793553
T1	30.968	27.588	0.162524	27.5883				N1	29.151	27.2025	0.104123	27.0975
T1	31.212	27.751						N1	29.3581	27.0958
T2	30.2187	27.6304	0.103143	30.3216	3.03489	-1.31463	0.402028	N2	27.489	27.3108	0.5215	28.0103	0.508227	1.21203	2.31663
T2	30.425	27.2483	0.326249	27.2867				N2	28.532	27.6936	0.191407	27.5021
T2	30.321	26.9813						N2	28.01	27.502
T3	30.745	27.3114	0.257308	30.4875	3.30649	-1.58623	0.333041	N3	29.5081	27.9126	0.384066	29.8921	1.96273	-0.242471	0.845297
T3	30.2304	27.1717	0.126046	27.181				N3	30.2762	27.9125	0.029149	27.9294
T3	30.487	27.0598						N3	29.892	27.963
T4	31.059	28.3943	0.238005	31.297	2.73681	-1.01656	0.494294	N4	29.152	28.05	0.3475	28.8043	0.75418	0.966077	1.95352
T4	31.535	28.8615	0.26141	28.5602				N4	28.457	28.3165	0.266308	28.0502
T4	31.297	28.4247						N4	28.804	27.7839
T5	29.584	27.2355	0.713	28.871	1.59643	0.123823	1.08962	N5	28.485	27.8651	0.0613107	28.4855	0.608098	1.11216	2.16169
T5	28.158	27.274	0.0393717	27.2746				N5	28.547	27.8428	0.0420131	27.8774
T5	28.871	27.3142						N5	28.4244	27.9241
T6	29.4378	27.83	0.292284	29.3087	1.84107	-0.120811	0.919671	N6	28.2163	25.9808	0.711532	27.4781	1.71974	0.000518584	1.00036
T6	28.9741	27.467	0.362043	27.4676				N6	26.7966	25.5192	0.231251	25.7584
T6	29.5142	27.1059						N6	27.4214	25.775
T7	28.527	24.7691	0.3	28.2269	3.32653	-1.60627	0.328446	N7	29.2159	26.617	0.220888	28.995	2.62456	-0.904306	0.53429
T7	28.2266	25.2038	0.263646	24.9003				N7	28.7741	26.37	0.246325	26.3705
T7	27.927	24.7281						N7	28.995	26.1244
T8	30.485	26.897	0.32	30.805	3.72192	-2.00167	0.249711	N8	28.456	25.832	0.2355	28.2203	2.3877	-0.66744	0.629623
T8	31.125	27.083	0.186131	27.0831				N8	27.985	25.8226	0.0103516	25.8326
T8	30.805	27.2692						N8	28.22	25.8433
T9	30.814	27.3257	0.3305	30.4833	3.2859	-1.56564	0.337828	N9	29.895	27.1944	0.754669	29.8953	2.35323	-0.632971	0.644847
T9	30.153	27.0697	0.127997	27.1974				N9	29.1407	27.8897	0.347698	27.542
T9	30.483	27.197						N9	30.6501	27.542
T10	28.8148	26.6626	0.411659	29.2263	2.4245	-0.704239	0.613766	N10	28.5534	27.5021	0.685475	29.2386	1.87435	-0.154095	0.898696
T10	29.226	26.8893	0.12186	26.8018				N10	29.238	27.0994	0.229381	27.3642
T10	29.6381	26.8535						N10	29.9243	27.4911
T11	30.72	25.6689	0.75717	30.7205	4.72256	-3.0023	0.124801	N11	28.2876	26.1379	0.0589879	28.2284	2.07616	-0.355899	0.781383
T11	31.4779	26.0772	0.297428	25.998				N11	28.1697	26.5622	0.402915	26.1523
T11	29.9636	26.2477						N11	28.228	25.7568
									The average expression of the control group				1.72026
							Final summary
							Sample Name	T	N
							1	0.267246	0.793553
							2	0.402028	2.31663
							3	0.333041	0.845297		P=0.006
							4	0.494294	1.95352
							5	1.08962	2.16169
							6	0.919671	1.00036
							7	0.328446	0.53429
							8	0.249711	0.629623
							9	0.337828	0.644847
							10	0.613766	0.898696
							11	0.124801	0.781383

## Sheet: LINC00598
Sample Name	LINC00598	GAPDH	SD	average	△CT	△△CT	2^△△CT（processing group）	Sample Name	LINC00598	GAPDH	SD	average	△CT	△△CT	2^△△CT（Control group）
T1	36.199	30.426	0.849117	35.2523	4.66398	-3.27152	0.103556	N1	29.253	26.9943	0.475346	29.2534	2.15593	-0.763463	0.589081
T1	34.558	30.588	0.162524	30.5883				N1	28.7783	27.2025	0.104123	27.0975
T1	34.9999	30.751						N1	29.729	27.0958
T2	30.254	30.6304	2.04901	32.2996	2.01296	-0.620496	0.650447	N2	30.6049	30.3108	0.919299	29.6854	-0.546183	1.93865	3.83346
T2	34.352	30.2483	0.326249	30.2867				N2	28.7663	30.6936	0.506232	30.2316
T2	32.2929	29.9813						N2	29.685	29.6904
T3	31.315	27.3114	0.0999216	31.4146	4.23362	-2.84115	0.139549	N3	28.8982	27.9126	0.339395	28.5585	0.629167	0.763299	1.69737
T3	31.414	27.1717	0.126046	27.181				N3	28.558	27.9125	0.029149	27.9294
T3	31.5148	27.0598						N3	28.2194	27.963
T4	32.657	28.3943	0.0933515	32.6572	4.09699	-2.70452	0.153411	N4	27.3564	28.6225	3.75332	31.1095	1.86851	-0.476047	0.718945
T4	32.7506	28.8615	0.26141	28.5602				N4	31.109	29.3165	0.58441	29.241
T4	32.5639	28.4247						N4	34.863	29.7839
T5	29.1014	27.2355	0.20803	29.3093	2.03474	-0.642277	0.640701	N5	31.031	27.8651	0.226031	31.031	3.15365	-1.76118	0.295007
T5	29.5175	27.274	0.0393717	27.2746				N5	30.805	27.8428	0.0420131	27.8774
T5	29.309	27.3142						N5	31.257	27.9241
T6	30.364	29.83	2.14452	32.5033	3.03563	-1.64316	0.320153	N6	26.6479	23.9808	0.146927	26.5007	2.74232	-1.34985	0.392332
T6	34.653	29.467	0.362043	29.4676				N6	26.5	23.5192	0.231251	23.7584
T6	32.4928	29.1059						N6	26.3541	23.775
T7	28.1561	24.7691	0.714041	28.8899	3.98962	-2.59715	0.165264	N7	28.5729	26.617	0.698284	27.8744	1.50393	-0.111461	0.92565
T7	29.5823	25.2038	0.263646	24.9003				N7	27.874	26.37	0.246325	26.3705
T7	28.9315	24.7281						N7	27.1763	26.1244
T8	29.6754	26.897	0.389729	29.8897	2.30666	-0.914193	0.530641	N8	27.97	25.832	0.454227	28.4242	2.59155	-1.19908	0.435553
T8	30.3396	27.583	0.686131	27.5831				N8	28.424	25.8226	0.0103516	25.8326
T8	29.6542	28.2692						N8	28.8785	25.8433
T9	32.051	30.3257	0.0374397	32.0512	1.05975	0.332711	1.25938	N9	30.6909	29.1944	1.39061	29.3002	0.258184	1.13428	2.19509
T9	32.0138	31.0697	0.630326	30.9914				N9	29.3	28.8897	0.152302	29.042
T9	32.0887	31.579						N9	27.9097	29.042
T10	29.586	26.6626	0.773261	29.5861	2.78428	-1.39182	0.381084	N10	27.4797	27.5021	0.651082	28.1305	0.766299	0.626166	1.54346
T10	28.8129	26.8893	0.12186	26.8018				N10	28.7818	27.0994	0.229381	27.3642
T10	30.3594	26.8535						N10	28.13	27.4911
T11	28.625	25.6689	0.250202	28.6255	2.62751	-1.23504	0.424831	N11	25.6878	26.1379	0.658299	26.3461	0.193776	1.19869	2.29531
T11	28.3755	26.0772	0.297428	25.998				N11	27.0044	26.5622	0.402915	26.1523
T11	28.8759	26.2477						N11	26.346	25.7568
									The average expression of the control group				1.39247
							Final summary
							Sample Name	T	N
							1	0.103556	0.589081
							2	0.650447	3.83346
							3	0.139549	1.69737
							4	0.153411	0.718945		P=0.015
							5	0.640701	0.295007
							6	0.320153	0.392332
							7	0.165264	0.92565
							8	0.530641	0.435553
							9	1.25938	2.19509
							10	0.381084	1.54346
							11	0.424831	2.29531

## Sheet: GATA3-AS1
Sample Name	GATA3-AS1	GAPDH	SD	average	△CT	△△CT	2^△△CT（processing group）	Sample Name	GATA3-AS1	GAPDH	SD	average	△CT	△△CT	2^△△CT（Control group）
T1	31.3972	25.9461	0.101399	31.4984	5.44455	2.52096	5.73966	N1	32.5938	26.2322	0.683937	33.2775	6.7952	1.17032	2.25061
T1	31.498	26.1817	0.11908	26.0538				N1	33.277	27.0149	0.46156	26.4823
T1	31.6	26.0336						N1	33.9616	26.1997
T2	31.5896	26.4126	0.367943	31.9574	5.5469	2.41862	5.34658	N2	33.6468	22.6898	0.595864	33.0506	10.3377	-2.37222	0.193148
T2	31.957	26.4697	0.0602758	26.4105				N2	32.455	22.7822	0.0611581	22.7129
T2	32.3255	26.3492						N2	33.05	22.6666
T3	28.494	22.2561	0.0581342	28.4942	6.26264	1.70287	3.25547	N3	33.792	25.7423	0.0835571	33.8184	7.92231	0.0432065	1.0304
T3	28.4361	22.3015	0.0849872	22.2315				N3	33.9119	26.2107	0.272516	25.8961
T3	28.5524	22.1369						N3	33.7511	25.7352
T4	31.7715	25.2867	0.191944	31.5793	6.23178	1.73373	3.32588	N4	34.444	24.1052	0.289169	34.4441	10.4082	-2.44271	0.183938
T4	31.579	25.5466	0.176624	25.3476				N4	34.155	23.9901	0.0610397	24.0359
T4	31.3876	25.2095						N4	34.7333	24.0124
T5	33.8761	26.8168	0.4058	33.4702	6.86915	1.09636	2.13815	N5	34.83	27.0035	0.357764	34.8305	7.71632	0.249191	1.18854
T5	33.0645	26.4408	0.19405	26.601				N5	35.1885	27.1592	0.0963703	27.1142
T5	33.47	26.5456						N5	34.473	27.1798
T6	34.697	28.8587	0.0770933	34.6972	5.7061	2.25942	4.78798	N6	34.129	25.4051	0.101151	34.2301	8.89517	-0.929662	0.524981
T6	34.6202	28.9956	0.130226	28.9911				N6	34.3313	25.1461	0.165313	25.3349
T6	34.7744	29.119						N6	34.23	25.4536
T7	32.5772	26.2872	0.116888	32.6941	6.63643	1.32909	2.51243	N7	35.2359	27.6751	0.368887	34.8666	7.16096	0.804551	1.7466
T7	32.694	25.9662	0.200133	26.0576				N7	34.866	27.8008	0.0840997	27.7057
T7	32.811	25.9196						N7	34.4981	27.6412
T8	33.852	27.8186	0.546505	34.3999	6.50708	1.45843	2.74809	N8	35.5035	28.6344	0.296965	35.2064	7.0227	0.942812	1.92227
T8	34.945	27.9819	0.0826402	27.8928				N8	34.9096	27.8481	0.405618	28.1837
T8	34.4026	27.8779						N8	35.206	28.0685
T9	35.3555	30.7249	0.210408	35.5656	4.88327	3.08224	8.46928	N9	35.3123	28.7047	0.188929	35.1232	6.38338	1.58214	2.99413
T9	35.7763	30.6401	0.0423881	30.6824				N9	35.123	28.8798	0.126047	28.7399
T9	35.565	30.682						N9	34.9344	28.6351
T10	32.4743	26.7178	0.523411	32.9974	6.28744	1.67807	3.2	N10	33.987	27.6697	0.0378135	33.9872	6.35935	1.60616	3.0444
T10	32.997	26.5581	0.148205	26.71				N10	34.0251	27.5809	0.0446139	27.6278
T10	33.5211	26.8542						N10	33.9494	27.6328
T11	33.816	25.6689	0.640631	33.8162	7.8182	0.14731	1.1075	N11	34.4517	26.1379	0.320151	34.7716	8.6193	-0.653783	0.635611
T11	33.1756	26.0772	0.297428	25.998				N11	35.092	26.5622	0.402915	26.1523
T11	34.4569	26.2477						N11	34.771	25.7568
									The average expression of the control group				7.96551
							Final summary
							Sample Name	T	N
							1	5.73966	2.25061
							2	5.34658	0.193148
							3	3.25547	1.0304
							4	3.32588	0.183938		P=0.002
							5	2.13815	1.18854
							6	4.78798	0.524981
							7	2.51243	1.7466
							8	2.74809	1.92227
							9	8.46928	2.99413
							10	3.2	3.0444
							11	1.1075	0.635611

## Sheet: PWRN1
Sample Name	PWRN1	GAPDH	SD	average	△CT	△△CT	2^△△CT（processing group）	Sample Name	PWRN1	GAPDH	SD	average	△CT	△△CT	2^△△CT（Control group）
T1	27.811	26.1057	0.163864	27.7935	1.62812	2.82798	7.10079	N1	29.451	26.0949	0.0970735	29.5387	3.43242	1.02368	2.0331
T1	27.9479	26.2649	0.0867372	26.1654				N1	29.522	26.0892	0.0247399	26.1062
T1	27.6216	26.1255						N1	29.643	26.1346
T2	27.8841	26.1418	0.0229961	27.9105	1.79065	2.66545	6.34427	N2	31.1215	25.9367	0.285527	31.4001	5.38832	-0.932215	0.524053
T2	27.9264	26.099	0.0214527	26.1198				N2	31.3868	25.9865	0.0904828	26.0118
T2	27.9209	26.1187						N2	31.6921	26.1123
T3	27.8879	26.0108	0.0353587	27.909	1.84524	2.61087	6.1087	N3	30.7189	26.0663	0.101389	30.8071	4.59377	-0.137671	0.908986
T3	27.9498	26.0773	0.0476027	26.0637				N3	30.7846	26.1464	0.18961	26.2133
T3	27.8893	26.1031						N3	30.9179	26.4273
T4	26.9697	26.1478	0.00295049	26.9727	0.847053	3.60905	12.202	N4	30.2087	25.8887	0.0664981	30.2814	4.33037	0.12573	1.09106
T4	26.9756	26.0978	0.0254656	26.1257				N4	30.3393	25.9944	0.0553158	25.951
T4	26.9729	26.1313						N4	30.2961	25.9699
T5	29.2113	26.027	0.0399352	29.2539	3.23467	1.22143	2.33178	N5	30.9651	25.9395	0.0546368	31.0075	4.95204	-0.495941	0.709099
T5	29.26	26.0612	0.0463006	26.0193				N5	30.9883	26.1799	0.120384	26.0555
T5	29.2905	25.9696						N5	31.0692	26.0471
T6	27.6349	26.7178	0.381753	28.0297	1.3197	3.1364	8.79328	N6	31.526	26.2322	0.431303	31.5447	5.0624	-0.606295	0.656881
T6	28.0573	26.5581	0.148205	26.71				N6	31.985	27.0149	0.46156	26.4823
T6	28.3969	26.8542						N6	31.123	26.1997
T7	28.5385	25.6689	0.109059	28.4668	2.46886	1.98724	3.96478	N7	30.789	26.1379	0.244301	30.775	4.62272	-0.166616	0.89093
T7	28.3413	26.0772	0.297428	25.998				N7	30.524	26.5622	0.402915	26.1523
T7	28.5207	26.2477						N7	31.012	25.7568
T8	27.569	25.2867	0.233402	27.8287	2.4811	1.975	3.93129	N8	29.423	25.5192	0.0781729	29.474	3.50357	0.952529	1.93526
T8	27.896	25.5466	0.176624	25.3476				N8	29.564	25.775	0.57438	25.9704
T8	28.021	25.2095						N8	29.435	26.617
T9	29.125	26.8168	0.245561	28.855	2.25396	2.20215	4.60164	N9	29.145	26.1379	0.517556	29.7177	3.56539	0.890717	1.8541
T9	28.645	26.4408	0.19405	26.601				N9	30.152	26.5622	0.402915	26.1523
T9	28.795	26.5456						N9	29.856	25.7568
T10	29.623	25.9461	0.635203	29.4013	3.34751	1.10859	2.15635	N10	31.425	26.9943	0.301653	31.6427	4.87849	-0.422386	0.74619
T10	29.896	26.1817	0.11908	26.0538				N10	31.516	26.2025	0.489076	26.7642
T10	28.685	26.0336						N10	31.987	27.0958
T11	28.985	26.4126	0.309406	28.8247	2.41418	2.04193	4.11795	N11	30.625	25.9808	0.262227	30.446	4.68764	-0.231532	0.85173
T11	28.468	26.4697	0.0602758	26.4105				N11	30.145	25.5192	0.231251	25.7584
T11	29.021	26.3492						N11	30.568	25.775
									The average expression of the control group				4.4561
							Final summary
							Sample Name	T	N
							1	7.10079	2.0331
							2	6.34427	0.524053
							3	6.1087	0.908986
							4	12.202	1.09106
							5	2.33178	0.709099		P=0.000
							6	8.79328	0.656881
							7	3.96478	0.89093
							8	3.93129	1.93526
							9	4.60164	1.8541
							10	2.15635	0.74619
							11	4.11795	0.85173

## Sheet: LINC01551
Sample Name	LINC01551	GAPDH	SD	average	△CT	△△CT	2^△△CT（processing group）	Sample Name	LINC01551	GAPDH	SD	average	△CT	△△CT	2^△△CT（Control group）
T1	31.7913	26.1057	0.134667	31.8567	5.69132	-2.69666	0.15425	N1	29.1372	26.0949	0.0120049	29.1252	3.019	-0.0243396	0.983271
T1	32.0116	26.2649	0.0867372	26.1654				N1	29.1132	26.0892	0.0247399	26.1062
T1	31.7672	26.1255						N1	29.1253	26.1346
T2	31.9713	26.1418	0.267541	31.7189	5.59905	-2.60439	0.164437	N2	28.8858	25.9367	0.166563	28.6975	2.68573	0.308928	1.23879
T2	31.4384	26.099	0.0214527	26.1198				N2	28.5695	25.9865	0.0904828	26.0118
T2	31.7469	26.1187						N2	28.6373	26.1123
T3	30.8522	26.0108	0.0557454	30.8201	4.75633	-1.76168	0.294905	N3	28.9498	26.0663	0.180913	29.1066	2.89324	0.10142	1.07283
T3	30.7557	26.0773	0.0476027	26.0637				N3	29.0654	26.1464	0.18961	26.2133
T3	30.8523	26.1031						N3	29.3045	26.4273
T4	30.2777	26.1478	0.121596	30.4072	4.28149	-1.28684	0.409849	N4	29.4495	25.8887	0.242884	29.2433	3.29236	-0.297706	0.813545
T4	30.4249	26.0978	0.0254656	26.1257				N4	28.9756	25.9944	0.0553158	25.951
T4	30.5189	26.1313						N4	29.3049	25.9699
T5	30.4872	26.027	0.0340945	30.4802	4.46097	-1.46631	0.361907	N5	28.9716	25.9395	0.103643	28.9109	2.85537	0.139286	1.10136
T5	30.4432	26.0612	0.0463006	26.0193				N5	28.7912	26.1799	0.120384	26.0555
T5	30.5103	25.9696						N5	28.9698	26.0471
T6	31.856	26.7178	0.118395	31.7907	5.08066	-2.086	0.235533	N6	29.893	26.2322	0.392281	29.4507	2.9684	0.0262596	1.01837
T6	31.654	26.5581	0.148205	26.71				N6	29.145	27.0149	0.46156	26.4823
T6	31.862	26.8542						N6	29.314	26.1997
T7	30.145	25.6689	0.459996	30.6673	4.66938	-1.67472	0.313226	N7	29.624	26.1379	0.403287	29.5647	3.41239	-0.417728	0.748602
T7	30.845	26.0772	0.297428	25.998				N7	29.135	26.5622	0.402915	26.1523
T7	31.012	26.2477						N7	29.935	25.7568
T8	29.896	25.2867	0.323204	29.836	4.48843	-1.49377	0.355082	N8	29.215	25.5192	0.079758	29.2743	3.30391	-0.30925	0.807061
T8	30.125	25.5466	0.176624	25.3476				N8	29.365	25.775	0.57438	25.9704
T8	29.487	25.2095						N8	29.243	26.617
T9	30.258	26.8168	0.151248	30.222	3.62096	-0.626297	0.647837	N9	29.154	26.1379	0.286182	29.304	3.15172	-0.157062	0.89685
T9	30.056	26.4408	0.19405	26.601				N9	29.634	26.5622	0.402915	26.1523
T9	30.352	26.5456						N9	29.124	25.7568
T10	30.158	25.9461	0.110351	30.0827	4.02884	-1.03418	0.488292	N10	28.617	26.9943	0.765418	29.4993	2.73516	0.259502	1.19707
T10	29.956	26.1817	0.11908	26.0538				N10	29.985	26.2025	0.489076	26.7642
T10	30.134	26.0336						N10	29.896	27.0958
T11	31.259	26.4126	0.113896	31.1873	4.77684	-1.78219	0.290743	N11	28.685	25.9808	0.423	28.3823	2.62397	0.370689	1.29297
T11	31.056	26.4697	0.0602758	26.4105				N11	28.563	25.5192	0.231251	25.7584
T11	31.247	26.3492						N11	27.899	25.775
									The average expression of the control group				2.99466
							Final summary
							Sample Name	T	N
							1	0.15425	0.983271
							2	0.164437	1.23879
							3	0.294905	1.07283
							4	0.409849	0.813545		P=0.000
							5	0.361907	1.10136
							6	0.235533	1.01837
							7	0.313226	0.748602
							8	0.355082	0.807061
							9	0.647837	0.89685
							10	0.488292	1.19707
							11	0.290743	1.29297
