# Supplementary material for: Differential lncRNA/mRNA expression profiling and ceRNA network analyses in amniotic fluid from foetuses with ventricular septal defects
Source: PeerJ. 2023 Feb 27;11:e14962. doi: 10.7717/peerj.14962 (PMC9979828; doi:10.7717/peerj.14962)
Supplement: Supplemental Information 6 [file peerj-11-14962-s006.xlsx]

## Sheet: Sheet1
SERIES
title	Analysis of Amniotic Fluid-derived lncRNAs and mRNAs in Fetuses with ventricular septal defect
summary	Ventricular septal defect (VSD) is one of the most prevalent birth defects. The pathogenesis of VSD remains unknown. to analyze the expression of AF-derived lncRNAs and their roles in VSD development, Arraystar Human LncRNA Microarray V5.0 is employed for the global profiling of human lncRNAs and protein-coding transcripts.
summary	Ventricular septal defect (VSD) is one of the most prevalent birth defects. The pathogenesis of VSD remains unknown. to analyze the expression of AF-derived lncRNAs and their roles in VSD development, Arraystar Human LncRNA Microarray V5.0 is employed for the global profiling of human lncRNAs and protein-coding transcripts.
overall design	Arraystar Human LncRNA Microarray V5.0 was used to screen differentially expressed lncRNAs (DE-lncRNAs) and mRNAs (DE-mRNAs) in AF between the VSD group and the control group
contributor	H Wang	G Lyu
contributor	H Wang	G Lyu
SAMPLES
Sample name	title	CEL file	source name	organism	characteristics: tag	molecule	label	description	chip name or GEO platform id
SAMPLE 1	control sample 1		Amniotic Fluid	Homo sapiens	disease state: healthy tissue preparation: frozen tissue tissue: Amniotic Fluid	total RNA	Cy3		GPL26963
SAMPLE 2	control sample 2		Amniotic Fluid	Homo sapiens	disease state: healthy tissue preparation: frozen tissue tissue: Amniotic Fluid	total RNA	Cy3		GPL26963
SAMPLE 3	control sample 3		Amniotic Fluid	Homo sapiens	disease state: healthy tissue preparation: frozen tissue tissue: Amniotic Fluid	total RNA	Cy3		GPL26963
SAMPLE 4	control sample 4		Amniotic Fluid	Homo sapiens	disease state: healthy tissue preparation: frozen tissue tissue: Amniotic Fluid	total RNA	Cy3		GPL26963
SAMPLE 5	control sample 5		Amniotic Fluid	Homo sapiens	disease state: healthy tissue preparation: frozen tissue tissue: Amniotic Fluid	total RNA	Cy3		GPL26963
SAMPLE 6	VSD sample 1		Amniotic Fluid	Homo sapiens	disease state: VSD tissue preparation: frozen tissue tissue: Amniotic Fluid	total RNA	Cy3		GPL26963
SAMPLE 7	VSD sample 2		Amniotic Fluid	Homo sapiens	disease state: VSD tissue preparation: frozen tissue tissue: Amniotic Fluid	total RNA	Cy3		GPL26963
SAMPLE 8	VSD sample 3		Amniotic Fluid	Homo sapiens	disease state: VSD tissue preparation: frozen tissue tissue: Amniotic Fluid	total RNA	Cy3		GPL26963
SAMPLE 9	VSD sample 4		Amniotic Fluid	Homo sapiens	disease state: VSD tissue preparation: frozen tissue tissue: Amniotic Fluid	total RNA	Cy3		GPL26963
SAMPLE 10	VSD sample 5		Amniotic Fluid	Homo sapiens	disease state: VSD tissue preparation: frozen tissue tissue: Amniotic Fluid	total RNA	Cy3		GPL26963
PROTOCOLS
extract protocol	Total RNA was isolated from Amniotic Fluid using the TRIzol reagent (Invitrogen) following the manufacturer's recommendations. RNA was quantified using a NanoDrop-1000 spectrophotometer and RNA integrity was determined by 1% formaldehyde denaturing gel electrophoresis.
label protocol	Each RNA sample was amplified and transcribed into fluorescent cRNA along the entire length of the transcripts without 3' bias utilizing a random priming method (Arraystar Flash RNA Labeling Kit, Arraystar). The labeled cRNAs were purified by RNeasy Mini Kit (Qiagen). The concentration and specific activity of the labeled cRNAs (pmol Cy3/μg cRNA) were measured by NanoDrop ND-1000.
hyb protocol	Sample labeling and array hybridization were performed according to the Agilent One-Color Microarray-Based Gene Expression Analysis protocol (Agilent Technology). 1 μg of each labeled cRNA was fragmented by adding 5 μl 10 × Blocking Agent and 1 μl of 25 × Fragmentation Buffer, then heated the mixture at 60°C for 30 min, finally 25 μl 2 × GE Hybridization buffer was added to dilute the labeled cRN…
scan protocol	The hybridized arrays were washed, fixed and scanned with using the Agilent DNA Microarray Scanner (part number G2505C). 1. Assemble the slides into an slide holder. 2. Place assembled slide holders into scanner carousel. 3. Verify scan settings for one-color scans. 4. Click Scan Slot m-n on the Scan Control main window where the letter m represents the Start slot where the first slide is located…
data processing	Agilent Feature Extraction software (version 11.0.1.1) was used to analyze acquired array images. Quantile normalization and subsequent data processing were performed with using the GeneSpring GX v12.1 software package (Agilent Technologies). After quantile normalization of the raw data, LncRNAs and mRNAs that at least 5 out of 10 samples have flags in Present or Marginal (“All Targets Value”) we…
value definition	Quantile normalized signal
